# Supplementary material for: A dataset for examining trends in publication of new Australian insects
Source: Biodivers Data J. 2014 Jul 7;(2):e1160. doi: 10.3897/BDJ.2.e1160 (PMC4092321; doi:10.3897/BDJ.2.e1160)
Supplement: Supplementary material 1 — nai50 [file biodiversity_data_journal-2-e1160-s001.csv]

AFD_higher_taxon	Order	Genus	Subgenus	Species	Subspecies	Name_type	Rank	Orig_combination	Author	Year	Full_author_name	No_auths	A_in_B	Pub_ID	Citation	Pub_type	Pub_country	Pub_ento	J_title	A_publr_class	A_publr
Aleyrodoidea	Hemiptera	Aleurocanthus		ceracroceus		Valid	Species	Y	Martin	1999	Martin, J.	1	no	1878	Martin, J. 1999. The Whitefly Fauna of Australia (Sternorrhyncha: Aleyrodidae). A taxonomic account and identification guide. Technical Paper No. 38. Canberra : CSIRO Publishing; pp. 1-197.	Book	Australia	yes	na	agency	CSIRO
Aleyrodoidea	Hemiptera	Aleurocanthus		froggatti		Valid	Species	Y	Martin	1999	Martin, J.	1	no	1878	Martin, J. 1999. The Whitefly Fauna of Australia (Sternorrhyncha: Aleyrodidae). A taxonomic account and identification guide. Technical Paper No. 38. Canberra : CSIRO Publishing; pp. 1-197.	Book	Australia	yes	na	agency	CSIRO
Aleyrodoidea	Hemiptera	Aleurocanthus		luteus		Valid	Species	Y	Martin	1985	Martin, J.	1	no	1877	Martin, J. 1985. The whitefly of New Guinea. Bulletin of the British Museum (Natural History) Entomology 50(3): 303-351	Article in Journal	UK	yes	Bulletin of the British Museum (Natural History) Entomology	na	na
Aleyrodoidea	Hemiptera	Aleurocanthus		valenciae		Valid	Species	Y	Martin & Carver in Martin	1999	Martin, J. & Carver, M. in Martin, J.	2	yes	1878	Martin, J. 1999. The Whitefly Fauna of Australia (Sternorrhyncha: Aleyrodidae). A taxonomic account and identification guide. Technical Paper No. 38. Canberra : CSIRO Publishing; pp. 1-197.	Book	Australia	yes	na	agency	CSIRO
Aleyrodoidea	Hemiptera	Aleuroclava		bagahformis		Valid	Species	Y	Gillespie	2008	Gillespie, P.S.	1	no	1128	Gillespie, P.S. 2008. Aleuroclava bagahformis, a new species of whitefly (Hemiptera: Aleyrodidae) from Southeastern Queensland. Australian Entomologist 35(4): 145-152	Article in Journal	Australia	yes	Australian Entomologist	society	EntSocQld
Aleyrodoidea	Hemiptera	Aleurodicus		dispersus		Valid	Species	Y	Russell	1965	Russell, L.M.	1	no	2646	Russell, L.M. 1965. A new species of Aleurodicus Douglas and two close relatives (Homoptera: Aleyrodidae). Florida Entomologist 48(1): 47-55	Article in Journal	USA	yes	Florida Entomologist	na	na
Aleyrodoidea	Hemiptera	Aleuroduplidens		carverae		Valid	Species	Y	Martin	1999	Martin, J.	1	no	1878	Martin, J. 1999. The Whitefly Fauna of Australia (Sternorrhyncha: Aleyrodidae). A taxonomic account and identification guide. Technical Paper No. 38. Canberra : CSIRO Publishing; pp. 1-197.	Book	Australia	yes	na	agency	CSIRO
Aleyrodoidea	Hemiptera	Aleuroduplidens		eucalyptifolia		Valid	Species	Y	Martin	1999	Martin, J.	1	no	1878	Martin, J. 1999. The Whitefly Fauna of Australia (Sternorrhyncha: Aleyrodidae). A taxonomic account and identification guide. Technical Paper No. 38. Canberra : CSIRO Publishing; pp. 1-197.	Book	Australia	yes	na	agency	CSIRO
Aleyrodoidea	Hemiptera	Aleuroduplidens		santali		Valid	Species	Y	Martin	1999	Martin, J.	1	no	1878	Martin, J. 1999. The Whitefly Fauna of Australia (Sternorrhyncha: Aleyrodidae). A taxonomic account and identification guide. Technical Paper No. 38. Canberra : CSIRO Publishing; pp. 1-197.	Book	Australia	yes	na	agency	CSIRO
Aleyrodoidea	Hemiptera	Aleuroduplidens		triangularis		Valid	Species	Y	Martin	1999	Martin, J.	1	no	1878	Martin, J. 1999. The Whitefly Fauna of Australia (Sternorrhyncha: Aleyrodidae). A taxonomic account and identification guide. Technical Paper No. 38. Canberra : CSIRO Publishing; pp. 1-197.	Book	Australia	yes	na	agency	CSIRO
Aleyrodoidea	Hemiptera	Aleuroduplidens		wellsae		Valid	Species	Y	Martin	1999	Martin, J.	1	no	1878	Martin, J. 1999. The Whitefly Fauna of Australia (Sternorrhyncha: Aleyrodidae). A taxonomic account and identification guide. Technical Paper No. 38. Canberra : CSIRO Publishing; pp. 1-197.	Book	Australia	yes	na	agency	CSIRO
Aleyrodoidea	Hemiptera	Aleuroinanis		myrtacei		Valid	Species	Y	Martin	1999	Martin, J.	1	no	1878	Martin, J. 1999. The Whitefly Fauna of Australia (Sternorrhyncha: Aleyrodidae). A taxonomic account and identification guide. Technical Paper No. 38. Canberra : CSIRO Publishing; pp. 1-197.	Book	Australia	yes	na	agency	CSIRO
Aleyrodoidea	Hemiptera	Aleuromarginatus		marginiquus		Valid	Species	Y	Martin	1999	Martin, J.	1	no	1878	Martin, J. 1999. The Whitefly Fauna of Australia (Sternorrhyncha: Aleyrodidae). A taxonomic account and identification guide. Technical Paper No. 38. Canberra : CSIRO Publishing; pp. 1-197.	Book	Australia	yes	na	agency	CSIRO
Aleyrodoidea	Hemiptera	Aleuromarginatus		moundi		Valid	Species	Y	Martin	1999	Martin, J.	1	no	1878	Martin, J. 1999. The Whitefly Fauna of Australia (Sternorrhyncha: Aleyrodidae). A taxonomic account and identification guide. Technical Paper No. 38. Canberra : CSIRO Publishing; pp. 1-197.	Book	Australia	yes	na	agency	CSIRO
Aleyrodoidea	Hemiptera	Aleuromarginatus		nemciae		Valid	Species	Y	Martin	1999	Martin, J.	1	no	1878	Martin, J. 1999. The Whitefly Fauna of Australia (Sternorrhyncha: Aleyrodidae). A taxonomic account and identification guide. Technical Paper No. 38. Canberra : CSIRO Publishing; pp. 1-197.	Book	Australia	yes	na	agency	CSIRO
Aleyrodoidea	Hemiptera	Aleuromarginatus		nigrus		Valid	Species	Y	Martin	1999	Martin, J.	1	no	1878	Martin, J. 1999. The Whitefly Fauna of Australia (Sternorrhyncha: Aleyrodidae). A taxonomic account and identification guide. Technical Paper No. 38. Canberra : CSIRO Publishing; pp. 1-197.	Book	Australia	yes	na	agency	CSIRO
Aleyrodoidea	Hemiptera	Aleuroplatus		buchananiae		Synonym of Aleuroplatus pectiniferus Quaintance & Baker, 1917	Species	Y	Jesudasan & David	1991	Jesudasan, R.W.A. & David, B.V.	2	no	1417	Jesudasan, R.W.A. & David, B.V. 1991. Taxonomic studies on Indian Aleyrodidae (Insecta: Homoptera). Oriental Insects 25: 231-434	Article in Journal	India	yes	Oriental Insects	na	na
Aleyrodoidea	Hemiptera	Aleuroplatus		cinnamomi		Synonym of Aleuroplatus pectiniferus Quaintance & Baker, 1917	Species	Y	Jesudasan & David	1991	Jesudasan, R.W.A. & David, B.V.	2	no	1417	Jesudasan, R.W.A. & David, B.V. 1991. Taxonomic studies on Indian Aleyrodidae (Insecta: Homoptera). Oriental Insects 25: 231-434	Article in Journal	India	yes	Oriental Insects	na	na
Aleyrodoidea	Hemiptera	Aleuroplatus		distinctus		Synonym of Aleuroplatus pectiniferus Quaintance & Baker, 1917	Species	Y	Jesudasan & David	1991	Jesudasan, R.W.A. & David, B.V.	2	no	1417	Jesudasan, R.W.A. & David, B.V. 1991. Taxonomic studies on Indian Aleyrodidae (Insecta: Homoptera). Oriental Insects 25: 231-434	Article in Journal	India	yes	Oriental Insects	na	na
Aleyrodoidea	Hemiptera	Aleuroplatus		walayarensis		Synonym of Aleuroplatus pectiniferus Quaintance & Baker, 1917	Species	Y	Jesudasan & David	1991	Jesudasan, R.W.A. & David, B.V.	2	no	1417	Jesudasan, R.W.A. & David, B.V. 1991. Taxonomic studies on Indian Aleyrodidae (Insecta: Homoptera). Oriental Insects 25: 231-434	Article in Journal	India	yes	Oriental Insects	na	na
Aleyrodoidea	Hemiptera	Australeurodes		operculobata		Valid	Species	N	Martin & Carver in Martin	1999	Martin, J. & Carver, M. in Martin, J.	2	yes	1878	Martin, J. 1999. The Whitefly Fauna of Australia (Sternorrhyncha: Aleyrodidae). A taxonomic account and identification guide. Technical Paper No. 38. Canberra : CSIRO Publishing; pp. 1-197.	Book	Australia	yes	na	agency	CSIRO
Aleyrodoidea	Hemiptera	Bemisia		argentifolii		Synonym of Bemisia tabaci (Gennadius, 1889)	Species	Y	Bellows & Perring in Bellows, Perring, Gill & Headrick	1994	Bellows, T.S., Jr. & Perring, T.M. in Bellows, T.S., Jr., Perring, T.M., Gill, R.J. & Headrick, D.H.	2	yes	269	Bellows, T.S., Jr., Perring, T.M., Gill, R.J. & Headrick, D.H. 1994. Description of a Species of Bemisia (Homoptera: Aleyrodidae). Annals of the Entomological Society of America 87: 195-206	Article in Journal	USA	yes	Annals of the Entomological Society of America	na	na
Aleyrodoidea	Hemiptera	Bemisia		capitata		Valid	Species	Y	Regu & David	1991	Regu, K. & David, B.V.	2	no	2525	Regu, K. & David, B.V. 1991. A new species of Bemisia (Homoptera: Aleyrodidae) from India with a key to Indian species. Entomon 16: 77-81	Article in Journal	India	yes	Entomon	na	na
Aleyrodoidea	Hemiptera	Bemisia		euphorbiae		Valid	Species	Y	David & Subramaniam	1976	David, B.V. & Subramaniam, T.R.	2	no	756	David, B.V. & Subramaniam, T.R. 1976. Studies on some Indian Aleyrodidae. Records of the Zoological Survey of India 70: 133-233	Article in Journal	India	no	Records of the Zoological Survey of India	na	na
Aleyrodoidea	Hemiptera	Bemisia		gigantea		Valid	Species	Y	Martin	1999	Martin, J.	1	no	1878	Martin, J. 1999. The Whitefly Fauna of Australia (Sternorrhyncha: Aleyrodidae). A taxonomic account and identification guide. Technical Paper No. 38. Canberra : CSIRO Publishing; pp. 1-197.	Book	Australia	yes	na	agency	CSIRO
Aleyrodoidea	Hemiptera	Bemisia		jasminum		Synonym of Bemisia giffardi (Kotinsky, 1907)	Species	Y	David & Subramaniam	1976	David, B.V. & Subramaniam, T.R.	2	no	756	David, B.V. & Subramaniam, T.R. 1976. Studies on some Indian Aleyrodidae. Records of the Zoological Survey of India 70: 133-233	Article in Journal	India	no	Records of the Zoological Survey of India	na	na
Aleyrodoidea	Hemiptera	Bemisia		minima		Synonym of Bemisia tabaci (Gennadius, 1889)	Species	Y	Danzig	1964	Danzig, E.M.	1	no	738	Danzig, E.M. 1964. The whiteflies (Homoptera, Aleyrodoidea) of the Caucasus. [in Russian]. Entomologicheskoe Obozrenie (English translation as Entomological Reviews) 43: 633-646	Article in Journal	Russia	yes	Entomologicheskoe Obozrenie	na	na
Aleyrodoidea	Hemiptera	Bemisia		miniscula		Synonym of Bemisia tabaci (Gennadius, 1889)	Species	Y	Danzig	1964	Danzig, E.M.	1	no	738	Danzig, E.M. 1964. The whiteflies (Homoptera, Aleyrodoidea) of the Caucasus. [in Russian]. Entomologicheskoe Obozrenie (English translation as Entomological Reviews) 43: 633-646	Article in Journal	Russia	yes	Entomologicheskoe Obozrenie	na	na
Aleyrodoidea	Hemiptera	Bemisia		subdecipiens		Valid	Species	Y	Martin	1999	Martin, J.	1	no	1878	Martin, J. 1999. The Whitefly Fauna of Australia (Sternorrhyncha: Aleyrodidae). A taxonomic account and identification guide. Technical Paper No. 38. Canberra : CSIRO Publishing; pp. 1-197.	Book	Australia	yes	na	agency	CSIRO
Aleyrodoidea	Hemiptera	Chitonaleyrodes		canberrensis		Valid	Species	Y	Martin	1999	Martin, J.	1	no	1878	Martin, J. 1999. The Whitefly Fauna of Australia (Sternorrhyncha: Aleyrodidae). A taxonomic account and identification guide. Technical Paper No. 38. Canberra : CSIRO Publishing; pp. 1-197.	Book	Australia	yes	na	agency	CSIRO
Aleyrodoidea	Hemiptera	Cortesiana		restonicae		Synonym of Bemisia tabaci (Gennadius, 1889)	Species	Y	Goux	1987	Goux, L.	1	no	1162	Goux, L. 1987. Aleurodes de France - VII Description de deux espèces nouvelles constituant des genres nouveaux. Bulletin de la Société Linnéenne de Provence 39: 63-66	Article in Journal	France	no	Bulletin de la Société Linnéenne de Provence	na	na
Aleyrodoidea	Hemiptera	Crenidorsum		millenium		Valid	Species	Y	Martin	1999	Martin, J.	1	no	1878	Martin, J. 1999. The Whitefly Fauna of Australia (Sternorrhyncha: Aleyrodidae). A taxonomic account and identification guide. Technical Paper No. 38. Canberra : CSIRO Publishing; pp. 1-197.	Book	Australia	yes	na	agency	CSIRO
Aleyrodoidea	Hemiptera	Cryptolingula		perplexa		Valid	Species	Y	Martin & Carver in Martin	1999	Martin, J. & Carver, M. in Martin, J.	2	yes	1878	Martin, J. 1999. The Whitefly Fauna of Australia (Sternorrhyncha: Aleyrodidae). A taxonomic account and identification guide. Technical Paper No. 38. Canberra : CSIRO Publishing; pp. 1-197.	Book	Australia	yes	na	agency	CSIRO
Aleyrodoidea	Hemiptera	Dialeurodes		bicornicauda		Valid	Species	Y	Martin	1999	Martin, J.	1	no	1878	Martin, J. 1999. The Whitefly Fauna of Australia (Sternorrhyncha: Aleyrodidae). A taxonomic account and identification guide. Technical Paper No. 38. Canberra : CSIRO Publishing; pp. 1-197.	Book	Australia	yes	na	agency	CSIRO
Aleyrodoidea	Hemiptera	Dialeurodes		dothioensis		Synonym of Dialeuropora decempuncta Quaintance & Baker, 1917	Species	Y	Dumbleton	1961	Dumbleton, L.J.	1	no	877	Dumbleton, L.J. 1961. The Aleyrodidae (Hemiptera - Homoptera) of New Caledonia. Pacific Science 15: 114-136	Article in Journal	USA	no	Pacific Science	na	na
Aleyrodoidea	Hemiptera	Dialeurolonga		rusostigmoides		Valid	Species	Y	Martin	1999	Martin, J.	1	no	1878	Martin, J. 1999. The Whitefly Fauna of Australia (Sternorrhyncha: Aleyrodidae). A taxonomic account and identification guide. Technical Paper No. 38. Canberra : CSIRO Publishing; pp. 1-197.	Book	Australia	yes	na	agency	CSIRO
Aleyrodoidea	Hemiptera	Dumbletoniella		callistemoni		Valid	Species	Y	Martin	1999	Martin, J.	1	no	1878	Martin, J. 1999. The Whitefly Fauna of Australia (Sternorrhyncha: Aleyrodidae). A taxonomic account and identification guide. Technical Paper No. 38. Canberra : CSIRO Publishing; pp. 1-197.	Book	Australia	yes	na	agency	CSIRO
Aleyrodoidea	Hemiptera	Dumbletoniella		pittospori		Valid	Species	Y	Martin & Carver in Martin	1999	Martin, J. & Carver, M. in Martin, J.	2	yes	1878	Martin, J. 1999. The Whitefly Fauna of Australia (Sternorrhyncha: Aleyrodidae). A taxonomic account and identification guide. Technical Paper No. 38. Canberra : CSIRO Publishing; pp. 1-197.	Book	Australia	yes	na	agency	CSIRO
Aleyrodoidea	Hemiptera	Dumbletoniella		rotunda		Valid	Species	Y	Martin & Carver in Martin	1999	Martin, J. & Carver, M. in Martin, J.	2	yes	1878	Martin, J. 1999. The Whitefly Fauna of Australia (Sternorrhyncha: Aleyrodidae). A taxonomic account and identification guide. Technical Paper No. 38. Canberra : CSIRO Publishing; pp. 1-197.	Book	Australia	yes	na	agency	CSIRO
Aleyrodoidea	Hemiptera	Dumbletoniella		xanthorrhoeae		Valid	Species	Y	Martin	1999	Martin, J.	1	no	1878	Martin, J. 1999. The Whitefly Fauna of Australia (Sternorrhyncha: Aleyrodidae). A taxonomic account and identification guide. Technical Paper No. 38. Canberra : CSIRO Publishing; pp. 1-197.	Book	Australia	yes	na	agency	CSIRO
Aleyrodoidea	Hemiptera	Gagudjuia		allosyncarpiae		Valid	Species	Y	Martin	1999	Martin, J.	1	no	1878	Martin, J. 1999. The Whitefly Fauna of Australia (Sternorrhyncha: Aleyrodidae). A taxonomic account and identification guide. Technical Paper No. 38. Canberra : CSIRO Publishing; pp. 1-197.	Book	Australia	yes	na	agency	CSIRO
Aleyrodoidea	Hemiptera	Indoaleyrodes		glochidioni		Valid	Species	Y	Martin & Carver in Martin	1999	Martin, J. & Carver, M. in Martin, J.	2	yes	1878	Martin, J. 1999. The Whitefly Fauna of Australia (Sternorrhyncha: Aleyrodidae). A taxonomic account and identification guide. Technical Paper No. 38. Canberra : CSIRO Publishing; pp. 1-197.	Book	Australia	yes	na	agency	CSIRO
Aleyrodoidea	Hemiptera	Neopealius		nilgiriensis		Synonym of Pealius azaleae (Baker & Moles, 1920)	Species	Y	David & Subramaniam	1976	David, B.V. & Subramaniam, T.R.	2	no	756	David, B.V. & Subramaniam, T.R. 1976. Studies on some Indian Aleyrodidae. Records of the Zoological Survey of India 70: 133-233	Article in Journal	India	no	Records of the Zoological Survey of India	na	na
Aleyrodoidea	Hemiptera	Nigrasialeyrodes		convexus		Valid	Species	Y	Martin & Carver in Martin	1999	Martin, J. & Carver, M. in Martin, J.	2	yes	1878	Martin, J. 1999. The Whitefly Fauna of Australia (Sternorrhyncha: Aleyrodidae). A taxonomic account and identification guide. Technical Paper No. 38. Canberra : CSIRO Publishing; pp. 1-197.	Book	Australia	yes	na	agency	CSIRO
Aleyrodoidea	Hemiptera	Orchamoplatus		louiserussellae		Valid	Species	Y	Martin	1999	Martin, J.	1	no	1878	Martin, J. 1999. The Whitefly Fauna of Australia (Sternorrhyncha: Aleyrodidae). A taxonomic account and identification guide. Technical Paper No. 38. Canberra : CSIRO Publishing; pp. 1-197.	Book	Australia	yes	na	agency	CSIRO
Aleyrodoidea	Hemiptera	Pealius		cryptus		Valid	Species	Y	Martin	1999	Martin, J.	1	no	1878	Martin, J. 1999. The Whitefly Fauna of Australia (Sternorrhyncha: Aleyrodidae). A taxonomic account and identification guide. Technical Paper No. 38. Canberra : CSIRO Publishing; pp. 1-197.	Book	Australia	yes	na	agency	CSIRO
Aleyrodoidea	Hemiptera	Pseudaleuroplatus		kiensis		Valid	Species	Y	Martin	1999	Martin, J.	1	no	1878	Martin, J. 1999. The Whitefly Fauna of Australia (Sternorrhyncha: Aleyrodidae). A taxonomic account and identification guide. Technical Paper No. 38. Canberra : CSIRO Publishing; pp. 1-197.	Book	Australia	yes	na	agency	CSIRO
Aleyrodoidea	Hemiptera	Pseudosynaleurodicus		mayoi		Valid	Species	Y	Gillespie	2006	Gillespie, P.S.	1	no	1127	Gillespie, P.S. 2006. A new genus and two new species of whitefly from Australia (Hemiptera: Aleyrodidae). Zootaxa 1306: 1-23	Article in Journal	New Zealand	no	Zootaxa	na	na
Aleyrodoidea	Hemiptera	Pseudosynaleurodicus		nigrimarginatus		Valid	Species	Y	Gillespie	2006	Gillespie, P.S.	1	no	1127	Gillespie, P.S. 2006. A new genus and two new species of whitefly from Australia (Hemiptera: Aleyrodidae). Zootaxa 1306: 1-23	Article in Journal	New Zealand	no	Zootaxa	na	na
Aleyrodoidea	Hemiptera	Pseudozaphanera		papyrocarpae		Valid	Species	N	Martin in Bailey, Martin, Noyes & Austin	2001	Martin, J.H. in Bailey, P.T., Martin, J.H., Noyes, J.S. & Austin, A.D.	1	yes	212	Bailey, P.T., Martin, J.H., Noyes, J.S. & Austin, A.D. 2001. Taxonomy and biology of a new species of Zaphanera (Hemiptera: Aleyrodidae) and its association with the widespread death of Western Myall trees, Acacia papyrocarpa, near Roxby Downs, South Australia. Transactions of the Royal Society of South Australia 125(2): 83-96	Article in Journal	Australia	no	Transactions of the Royal Society of South Australia	society	RoySocSA
Aleyrodoidea	Hemiptera	Pseudozaphanera		rhachisreticulata		Valid	Species	N	Martin	1999	Martin, J.	1	no	1878	Martin, J. 1999. The Whitefly Fauna of Australia (Sternorrhyncha: Aleyrodidae). A taxonomic account and identification guide. Technical Paper No. 38. Canberra : CSIRO Publishing; pp. 1-197.	Book	Australia	yes	na	agency	CSIRO
Aleyrodoidea	Hemiptera	Pseudozaphanera		splendida		Valid	Species	N	Martin	1999	Martin, J.	1	no	1878	Martin, J. 1999. The Whitefly Fauna of Australia (Sternorrhyncha: Aleyrodidae). A taxonomic account and identification guide. Technical Paper No. 38. Canberra : CSIRO Publishing; pp. 1-197.	Book	Australia	yes	na	agency	CSIRO
Aleyrodoidea	Hemiptera	Pseudozaphanera		wariensis		Valid	Species	N	Martin	1999	Martin, J.	1	no	1878	Martin, J. 1999. The Whitefly Fauna of Australia (Sternorrhyncha: Aleyrodidae). A taxonomic account and identification guide. Technical Paper No. 38. Canberra : CSIRO Publishing; pp. 1-197.	Book	Australia	yes	na	agency	CSIRO
Aleyrodoidea	Hemiptera	Rhachisphora		franksae		Valid	Species	Y	Martin	1999	Martin, J.	1	no	1878	Martin, J. 1999. The Whitefly Fauna of Australia (Sternorrhyncha: Aleyrodidae). A taxonomic account and identification guide. Technical Paper No. 38. Canberra : CSIRO Publishing; pp. 1-197.	Book	Australia	yes	na	agency	CSIRO
Aleyrodoidea	Hemiptera	Rhachisphora		queenslandica		Valid	Species	Y	Martin	1999	Martin, J.	1	no	1878	Martin, J. 1999. The Whitefly Fauna of Australia (Sternorrhyncha: Aleyrodidae). A taxonomic account and identification guide. Technical Paper No. 38. Canberra : CSIRO Publishing; pp. 1-197.	Book	Australia	yes	na	agency	CSIRO
Aleyrodoidea	Hemiptera	Septemaleurodes		swainei		Valid	Species	N	Martin	1999	Martin, J.	1	no	1878	Martin, J. 1999. The Whitefly Fauna of Australia (Sternorrhyncha: Aleyrodidae). A taxonomic account and identification guide. Technical Paper No. 38. Canberra : CSIRO Publishing; pp. 1-197.	Book	Australia	yes	na	agency	CSIRO
Aleyrodoidea	Hemiptera	Setaleyrodes		thretaonai		Valid	Species	Y	David	1981	David, B.V.	1	no	755	David, B.V. 1981. A new species of Setaleyrodes (Homoptera: Aleyrodidae) from India. Colemania 1: 37-38	Article in Journal	USA	yes	Colemania	na	na
Aleyrodoidea	Hemiptera	Setaleyrodes		vigintiseta		Valid	Species	Y	Martin	1999	Martin, J.	1	no	1878	Martin, J. 1999. The Whitefly Fauna of Australia (Sternorrhyncha: Aleyrodidae). A taxonomic account and identification guide. Technical Paper No. 38. Canberra : CSIRO Publishing; pp. 1-197.	Book	Australia	yes	na	agency	CSIRO
Aleyrodoidea	Hemiptera	Singhiella		premnae		Valid	Species	Y	Martin	1999	Martin, J.	1	no	1878	Martin, J. 1999. The Whitefly Fauna of Australia (Sternorrhyncha: Aleyrodidae). A taxonomic account and identification guide. Technical Paper No. 38. Canberra : CSIRO Publishing; pp. 1-197.	Book	Australia	yes	na	agency	CSIRO
Aleyrodoidea	Hemiptera	Synaleurodicus		serratus		Valid	Species	Y	Martin	1999	Martin, J.	1	no	1878	Martin, J. 1999. The Whitefly Fauna of Australia (Sternorrhyncha: Aleyrodidae). A taxonomic account and identification guide. Technical Paper No. 38. Canberra : CSIRO Publishing; pp. 1-197.	Book	Australia	yes	na	agency	CSIRO
Aleyrodoidea	Hemiptera	Tetraleurodes		banksiae		Valid	Species	Y	Martin	1999	Martin, J.	1	no	1878	Martin, J. 1999. The Whitefly Fauna of Australia (Sternorrhyncha: Aleyrodidae). A taxonomic account and identification guide. Technical Paper No. 38. Canberra : CSIRO Publishing; pp. 1-197.	Book	Australia	yes	na	agency	CSIRO
Aleyrodoidea	Hemiptera	Tetraleurodes		stirlingiae		Valid	Species	Y	Martin	1999	Martin, J.	1	no	1878	Martin, J. 1999. The Whitefly Fauna of Australia (Sternorrhyncha: Aleyrodidae). A taxonomic account and identification guide. Technical Paper No. 38. Canberra : CSIRO Publishing; pp. 1-197.	Book	Australia	yes	na	agency	CSIRO
Aleyrodoidea	Hemiptera	Tetraleurodes		sulcistriatus		Valid	Species	Y	Martin	1999	Martin, J.	1	no	1878	Martin, J. 1999. The Whitefly Fauna of Australia (Sternorrhyncha: Aleyrodidae). A taxonomic account and identification guide. Technical Paper No. 38. Canberra : CSIRO Publishing; pp. 1-197.	Book	Australia	yes	na	agency	CSIRO
Aleyrodoidea	Hemiptera	Tetraleurodes		supraxialis		Valid	Species	Y	Martin	1999	Martin, J.	1	no	1878	Martin, J. 1999. The Whitefly Fauna of Australia (Sternorrhyncha: Aleyrodidae). A taxonomic account and identification guide. Technical Paper No. 38. Canberra : CSIRO Publishing; pp. 1-197.	Book	Australia	yes	na	agency	CSIRO
Aleyrodoidea	Hemiptera	Tetralicia		debarroi		Valid	Species	Y	Martin & Carver in Martin	1999	Martin, J. & Carver, M. in Martin, J.	2	yes	1878	Martin, J. 1999. The Whitefly Fauna of Australia (Sternorrhyncha: Aleyrodidae). A taxonomic account and identification guide. Technical Paper No. 38. Canberra : CSIRO Publishing; pp. 1-197.	Book	Australia	yes	na	agency	CSIRO
Aleyrodoidea	Hemiptera	Trialeurodes		darwiniensis		Valid	Species	Y	Martin	1999	Martin, J.	1	no	1878	Martin, J. 1999. The Whitefly Fauna of Australia (Sternorrhyncha: Aleyrodidae). A taxonomic account and identification guide. Technical Paper No. 38. Canberra : CSIRO Publishing; pp. 1-197.	Book	Australia	yes	na	agency	CSIRO
Aleyrodoidea	Hemiptera	Trialeurodes		dicksoniae		Valid	Species	Y	Martin	1999	Martin, J.	1	no	1878	Martin, J. 1999. The Whitefly Fauna of Australia (Sternorrhyncha: Aleyrodidae). A taxonomic account and identification guide. Technical Paper No. 38. Canberra : CSIRO Publishing; pp. 1-197.	Book	Australia	yes	na	agency	CSIRO
Aleyrodoidea	Hemiptera	Vasdavidius		cobarensis		Valid	Species	N	Martin	1999	Martin, J.	1	no	1878	Martin, J. 1999. The Whitefly Fauna of Australia (Sternorrhyncha: Aleyrodidae). A taxonomic account and identification guide. Technical Paper No. 38. Canberra : CSIRO Publishing; pp. 1-197.	Book	Australia	yes	na	agency	CSIRO
Aleyrodoidea	Hemiptera	Vasdavidius		indicus		Valid	Species	N	David & Subramaniam	1976	David, B.V. & Subramaniam, T.R.	2	no	756	David, B.V. & Subramaniam, T.R. 1976. Studies on some Indian Aleyrodidae. Records of the Zoological Survey of India 70: 133-233	Article in Journal	India	no	Records of the Zoological Survey of India	na	na
Aleyrodoidea	Hemiptera	Viennotaleyrodes		bicolorata		Valid	Species	Y	Martin	1999	Martin, J.	1	no	1878	Martin, J. 1999. The Whitefly Fauna of Australia (Sternorrhyncha: Aleyrodidae). A taxonomic account and identification guide. Technical Paper No. 38. Canberra : CSIRO Publishing; pp. 1-197.	Book	Australia	yes	na	agency	CSIRO
Aleyrodoidea	Hemiptera	Viennotaleyrodes		curvisetosus		Valid	Species	Y	Martin	1999	Martin, J.	1	no	1878	Martin, J. 1999. The Whitefly Fauna of Australia (Sternorrhyncha: Aleyrodidae). A taxonomic account and identification guide. Technical Paper No. 38. Canberra : CSIRO Publishing; pp. 1-197.	Book	Australia	yes	na	agency	CSIRO
Aleyrodoidea	Hemiptera	Viennotaleyrodes		incomptus		Valid	Species	Y	Martin	1999	Martin, J.	1	no	1878	Martin, J. 1999. The Whitefly Fauna of Australia (Sternorrhyncha: Aleyrodidae). A taxonomic account and identification guide. Technical Paper No. 38. Canberra : CSIRO Publishing; pp. 1-197.	Book	Australia	yes	na	agency	CSIRO
Aleyrodoidea	Hemiptera	Viennotaleyrodes		lacunae		Valid	Species	Y	Martin	1999	Martin, J.	1	no	1878	Martin, J. 1999. The Whitefly Fauna of Australia (Sternorrhyncha: Aleyrodidae). A taxonomic account and identification guide. Technical Paper No. 38. Canberra : CSIRO Publishing; pp. 1-197.	Book	Australia	yes	na	agency	CSIRO
Aleyrodoidea	Hemiptera	Xenaleyrodes		fauceregius		Valid	Species	Y	Martin	1999	Martin, J.	1	no	1878	Martin, J. 1999. The Whitefly Fauna of Australia (Sternorrhyncha: Aleyrodidae). A taxonomic account and identification guide. Technical Paper No. 38. Canberra : CSIRO Publishing; pp. 1-197.	Book	Australia	yes	na	agency	CSIRO
Aleyrodoidea	Hemiptera	Xenaleyrodes		timonii		Valid	Species	Y	Martin	1985	Martin, J.	1	no	1877	Martin, J. 1985. The whitefly of New Guinea. Bulletin of the British Museum (Natural History) Entomology 50(3): 303-351	Article in Journal	UK	yes	Bulletin of the British Museum (Natural History) Entomology	na	na
Aphidoidea	Hemiptera	Anomalaphis		casimiri		Valid	Species	Y	Carver	1971	Carver, M.	1	no	567	Carver, M. 1971. New species of Anomalaphis Baker, 1920 and Neophyllaphis Takahashi, 1920 (Homoptera: Aphididae). Journal of Entomology B 40: 31-42	Article in Journal	UK	yes	Journal of Entomology	na	na
Aphidoidea	Hemiptera	Aphis	Aphis	acaenovinae		Valid	Species	Y	Eastop	1961	Eastop, V.F.	1	no	888	Eastop, V.F. 1961. Two new Aphis species (Hemiptera: Aphididae) from Australia. Entomologist's Monthly Magazine 96: 173-176	Article in Journal	UK	yes	Entomologist's Monthly Magazine	na	na
Aphidoidea	Hemiptera	Aphis	Aphis	platylobii		Valid	Species	Y	Carver & White	1970	Carver, M. & White, D.	2	no	573	Carver, M. & White, D. 1970. A new species of Aphis L. from Australia (Homoptera: Aphididae). Journal of the Australian Entomological Society 9: 223-226 [Date published December 31, 1970]	Article in Journal	Australia	yes	Journal of the Australian Entomological Society	society	AustEntSoc
Aphidoidea	Hemiptera	Aphis		hardyi		Synonym of Aphis (Aphis) eugeniae van der Goot, 1917	Species	Y	Eastop	1966	Eastop, V.F.	1	no	889	Eastop, V.F. 1966. A taxonomic study of Australian Aphidoidea (Homoptera). Australian Journal of Zoology 14: 399-592	Article in Journal	Australia	no	Australian Journal of Zoology	agency	CSIRO
Aphidoidea	Hemiptera	Casimira		canberrae		Valid	Species	N	Eastop	1961	Eastop, V.F.	1	no	888	Eastop, V.F. 1961. Two new Aphis species (Hemiptera: Aphididae) from Australia. Entomologist's Monthly Magazine 96: 173-176	Article in Journal	UK	yes	Entomologist's Monthly Magazine	na	na
Aphidoidea	Hemiptera	Ceriferella		dossuaria		Valid	Species	Y	Carver & Martyn	1965	Carver, M. & Martyn, E.J.	2	no	571	Carver, M. & Martyn, E.J. 1965. Description of a new aphid genus from Australia and of the alate viviparous female of Sensoriaphis tasmaniae Carver & Martyn, 1962 (Homoptera: Aphididae). Proceedings of the Royal Entomological Society of London (B) 34: 38-47	Article in Journal	UK	yes	Proceedings of the Royal Entomological Society of London (B)	na	na
Aphidoidea	Hemiptera	Ceriferella		leucopogonis		Valid	Species	Y	Carver & Martyn	1965	Carver, M. & Martyn, E.J.	2	no	571	Carver, M. & Martyn, E.J. 1965. Description of a new aphid genus from Australia and of the alate viviparous female of Sensoriaphis tasmaniae Carver & Martyn, 1962 (Homoptera: Aphididae). Proceedings of the Royal Entomological Society of London (B) 34: 38-47	Article in Journal	UK	yes	Proceedings of the Royal Entomological Society of London (B)	na	na
Aphidoidea	Hemiptera	Melanaphis		vandergooti		Synonym of Brachysiphoniella montana (van der Goot, 1917)	Species	Y	Raychaudhuri & Banerjee	1974	Raychaudhuri, D.N. & Banerjee, C.	2	no	2523	Raychaudhuri, D.N. & Banerjee, C. 1974. A study of the genus Melanaphis (Homoptera: Aphididae) with descriptions of new taxa from India. Oriental Insects 8: 365-384	Article in Journal	India	yes	Oriental Insects	na	na
Aphidoidea	Hemiptera	Micromyzella		judenkoi		Valid	Species	N	Carver	1965	Carver, M.	1	no	566	Carver, M. 1965. Two new species of Micromyzus van der Goot, 1917 (Homoptera: Aphididae). Proceedings of the Royal Entomological Society of London B 34: 113-116	Article in Journal	UK	yes	Proceedings of the Royal Entomological Society of London (B)	na	na
Aphidoidea	Hemiptera	Micromyzus		eastopi		Synonym of Ipuka dispersa (van der Goot, 1917)	Species	Y	Carver	1965	Carver, M.	1	no	566	Carver, M. 1965. Two new species of Micromyzus van der Goot, 1917 (Homoptera: Aphididae). Proceedings of the Royal Entomological Society of London B 34: 113-116	Article in Journal	UK	yes	Proceedings of the Royal Entomological Society of London (B)	na	na
Aphidoidea	Hemiptera	Myzus	Myzus	dycei		Valid	Species	Y	Carver	1961	Carver, M.	1	no	565	Carver, M. 1961. A new species of Myzus Passerini (Homoptera: Aphididae) from Australia. Proceedings of the Royal Entomological Society of London B 30: 69-71	Article in Journal	UK	yes	Proceedings of the Royal Entomological Society of London (B)	na	na
Aphidoidea	Hemiptera	Myzus		urticae		Synonym of Myzus (Myzus) dycei Miyazaki, 1971	Species	Y	Tao	1963	Tao, C.C.-c.	1	no	2954	Tao, C.C.-c. 1963. Revision of Chinese Macrosiphinae (Aphidae, Homoptera). Plant Protection Bulletin of Taiwan 5: 162-205	Article in Journal	Taiwan	no	Plant Protection Bulletin of Taiwan	na	na
Aphidoidea	Hemiptera	Neophyllaphis	Neophyllaphis	brimblecombei		Valid	Species	Y	Carver	1971	Carver, M.	1	no	567	Carver, M. 1971. New species of Anomalaphis Baker, 1920 and Neophyllaphis Takahashi, 1920 (Homoptera: Aphididae). Journal of Entomology B 40: 31-42	Article in Journal	UK	yes	Journal of Entomology	na	na
Aphidoidea	Hemiptera	Neophyllaphis	Neophyllaphis	lanata		Valid	Species	Y	Hales & Lardner	1988	Hales, D.F. & Lardner, R.M.	2	no	1206	Hales, D.F. & Lardner, R.M. 1988. Genetic evidence for the occurrence of a new species of Neophyllaphis Takahashi (Homoptera: Aphididae) in Australia. Journal of the Australian Entomological Society 27: 81-85	Article in Journal	Australia	yes	Journal of the Australian Entomological Society	society	AustEntSoc
Aphidoidea	Hemiptera	Pentalonia		gavarri		Valid	Species	Y	Eastop	1967	Eastop, V.F.	1	no	890	Eastop, V.F. 1967. A new species of Pentalonia Coquerel (Hem., Aphididae). Entomologist's Monthly Magazine 102: 145-146	Article in Journal	UK	yes	Entomologist's Monthly Magazine	na	na
Aphidoidea	Hemiptera	Schizaphis	Schizaphis	hypersiphonata		Valid	Species	Y	Basu	1970	Basu, A.N.	1	no	254	Basu, A.N. [1969] 1970. Further records of new and little known aphids (Homoptera) from West Bengal, India. Oriental Insects 3: 355-371	Article in Journal	India	yes	Oriental Insects	na	na
Aphidoidea	Hemiptera	Sensoriaphis		furcifera		Valid	Species	Y	Carver & Hales	1974	Carver, M. & Hales, D.	2	no	569	Carver, M. & Hales, D. 1974. A new species of Sensoriaphis Cottier, 1953 (Homoptera: Aphididae) from New South Wales. Journal of Entomology B 42: 113-125	Article in Journal	UK	yes	Journal of Entomology	na	na
Aphidoidea	Hemiptera	Sensoriaphis		tasmaniae		Valid	Species	Y	Carver & Martyn	1962	Carver, M. & Martyn, E.J.	2	no	570	Carver, M. & Martyn, E.J. 1962. A new species of Sensoriaphis Cottier (Homoptera: Aphididae) from Tasmania. Proceedings of the Royal Entomological Society of London (B) 31: 95-99	Article in Journal	UK	yes	Proceedings of the Royal Entomological Society of London (B)	na	na
Apoidea	Hymenoptera	Aha		evansi		Valid	Species	Y	Menke	1977	Menke, A.S.	1	no	1995	Menke, A.S. 1977. Aha, a new genus of Australian Sphecidae, and revised key to the world genera of the tribe Miscophini (Hymenoptera, Sphecidae, Larrinae). Polskie Pismo Entomologiczne 47: 671-681	Article in Journal	Poland	yes	Polskie Pismo Entomologiczne	na	na
Apoidea	Hymenoptera	Aha		ha		Valid	Species	Y	Menke	1977	Menke, A.S.	1	no	1995	Menke, A.S. 1977. Aha, a new genus of Australian Sphecidae, and revised key to the world genera of the tribe Miscophini (Hymenoptera, Sphecidae, Larrinae). Polskie Pismo Entomologiczne 47: 671-681	Article in Journal	Poland	yes	Polskie Pismo Entomologiczne	na	na
Apoidea	Hymenoptera	Allodapula		perkinsiella		Synonym of Braunsapis clarissima(Cockerell, 1929)	Species	Y	Michener & Syed	1962	Michener, C.D. & Syed, I.H.	2	no	2016	Michener, C.D. & Syed, I.H. 1962. Specific characters of the larvae and adults of Allodapula in the Australian region (Hymenoptera: Ceratinini). Journal of the Entomological Society of Queensland 1: 30-41 [Date published 31/12/1962]	Article in Journal	Australia	yes	Journal of the Entomological Society of Queensland	society	EntSocQld
Apoidea	Hymenoptera	Allostigmus		alexanderi		Valid	Species	Y	Melo & Naumann	1999	Melo, G.A.R. & Naumann, I.	2	no	1994	Melo, G.A.R. & Naumann, I. 1999. Two new genera of Pemphredonine wasps from Australia (Hymenoptera: Apoidea, Crabronidae). University of Kansas Museum of Natural History Special Publications 24: 221-229	Article in Journal	USA	no	University of Kansas Museum of Natural History Special Publications	na	na
Apoidea	Hymenoptera	Allostigmus		provisorius		Valid	Species	Y	Melo & Naumann	1999	Melo, G.A.R. & Naumann, I.	2	no	1994	Melo, G.A.R. & Naumann, I. 1999. Two new genera of Pemphredonine wasps from Australia (Hymenoptera: Apoidea, Crabronidae). University of Kansas Museum of Natural History Special Publications 24: 221-229	Article in Journal	USA	no	University of Kansas Museum of Natural History Special Publications	na	na
Apoidea	Hymenoptera	Amegilla	Asaropoda	epaphrodita		Valid	Species	Y	Brooks	1988	Brooks, R.W.	1	no	460	Brooks, R.W. 1988. Systematics and phylogeny of the anthophorine bees (Hymenoptera: Anthophoridae; Anthophorini). University of Kansas Science Bulletin 53: 436-575 [Date published 31/12/1988]	Article in Journal	USA	no	University of Kansas Science Bulletin	na	na
Apoidea	Hymenoptera	Amegilla	Asaropoda	houstoni		Valid	Species	Y	Brooks	1988	Brooks, R.W.	1	no	460	Brooks, R.W. 1988. Systematics and phylogeny of the anthophorine bees (Hymenoptera: Anthophoridae; Anthophorini). University of Kansas Science Bulletin 53: 436-575 [Date published 31/12/1988]	Article in Journal	USA	no	University of Kansas Science Bulletin	na	na
Apoidea	Hymenoptera	Amegilla	Asaropoda	paracalva		Valid	Species	Y	Brooks	1993	Brooks, R.W.	1	no	461	Brooks, R.W. 1993. A new Amegilla (Hymenoptera: Anthophoridae) from Western Australia. Records of the Western Australian Museum 16(2): 279-282 [Date published June]	Article in Journal	Australia	no	Records of the Western Australian Museum	museum	WAMus
Apoidea	Hymenoptera	Amphylaeus	Agogenohylaeus	flavicans		Valid	Species	Y	Houston	1975	Houston, T.F.	1	no	1334	Houston, T.F. 1975. A revision of the Australian hylaeine bees (Hymenoptera: Colletidae). I. Australian Journal of Zoology Supplementary Series 36: 1-135 [Date published 31/12/1975]	Article in Journal	Australia	no	Australian Journal of Zoology Supplementary Series	agency	CSIRO
Apoidea	Hymenoptera	Arpactophilus		deakinus		Valid	Species	Y	Matthews & Naumann	2002	Matthews, R.W. & Naumann, I.D.	2	no	1913	Matthews, R.W. & Naumann, I.D. 2002. Descriptions and biology of nine new species of Arpactophilus (Hymenoptera: Crabronidae), with a key to described Australian species. Journal of Hymenoptera Research 11: 101-133	Article in Journal	USA	yes	Journal of Hymenoptera Research	na	na
Apoidea	Hymenoptera	Arpactophilus		flavifrons		Valid	Species	Y	Matthews & Naumann	2002	Matthews, R.W. & Naumann, I.D.	2	no	1913	Matthews, R.W. & Naumann, I.D. 2002. Descriptions and biology of nine new species of Arpactophilus (Hymenoptera: Crabronidae), with a key to described Australian species. Journal of Hymenoptera Research 11: 101-133	Article in Journal	USA	yes	Journal of Hymenoptera Research	na	na
Apoidea	Hymenoptera	Arpactophilus		hursti		Valid	Species	Y	Matthews & Naumann	2002	Matthews, R.W. & Naumann, I.D.	2	no	1913	Matthews, R.W. & Naumann, I.D. 2002. Descriptions and biology of nine new species of Arpactophilus (Hymenoptera: Crabronidae), with a key to described Australian species. Journal of Hymenoptera Research 11: 101-133	Article in Journal	USA	yes	Journal of Hymenoptera Research	na	na
Apoidea	Hymenoptera	Arpactophilus		kakaduensis		Valid	Species	Y	Matthews & Naumann	2002	Matthews, R.W. & Naumann, I.D.	2	no	1913	Matthews, R.W. & Naumann, I.D. 2002. Descriptions and biology of nine new species of Arpactophilus (Hymenoptera: Crabronidae), with a key to described Australian species. Journal of Hymenoptera Research 11: 101-133	Article in Journal	USA	yes	Journal of Hymenoptera Research	na	na
Apoidea	Hymenoptera	Arpactophilus		magneticus		Valid	Species	Y	Matthews & Naumann	2002	Matthews, R.W. & Naumann, I.D.	2	no	1913	Matthews, R.W. & Naumann, I.D. 2002. Descriptions and biology of nine new species of Arpactophilus (Hymenoptera: Crabronidae), with a key to described Australian species. Journal of Hymenoptera Research 11: 101-133	Article in Journal	USA	yes	Journal of Hymenoptera Research	na	na
Apoidea	Hymenoptera	Arpactophilus		mimi		Valid	Species	Y	Naumann in Matthews & Naumann	1988	Naumann, I.D. in Matthews, R.W. & Naumann, I.D.	1	yes	1912	Matthews, R.W. & Naumann, I.D. 1988. Nesting biology and taxonomy of Arpactophilus mimi, a new species of social sphecid (Hymenoptera: Sphecidae) from northern Australia. Australian Journal of Zoology 36: 585-597	Article in Journal	Australia	no	Australian Journal of Zoology	agency	CSIRO
Apoidea	Hymenoptera	Arpactophilus		platycephalus		Valid	Species	Y	Matthews & Naumann	2002	Matthews, R.W. & Naumann, I.D.	2	no	1913	Matthews, R.W. & Naumann, I.D. 2002. Descriptions and biology of nine new species of Arpactophilus (Hymenoptera: Crabronidae), with a key to described Australian species. Journal of Hymenoptera Research 11: 101-133	Article in Journal	USA	yes	Journal of Hymenoptera Research	na	na
Apoidea	Hymenoptera	Arpactophilus		similus		Valid	Species	Y	Matthews & Naumann	2002	Matthews, R.W. & Naumann, I.D.	2	no	1913	Matthews, R.W. & Naumann, I.D. 2002. Descriptions and biology of nine new species of Arpactophilus (Hymenoptera: Crabronidae), with a key to described Australian species. Journal of Hymenoptera Research 11: 101-133	Article in Journal	USA	yes	Journal of Hymenoptera Research	na	na
Apoidea	Hymenoptera	Arpactophilus		termes		Valid	Species	Y	Matthews & Naumann	2002	Matthews, R.W. & Naumann, I.D.	2	no	1913	Matthews, R.W. & Naumann, I.D. 2002. Descriptions and biology of nine new species of Arpactophilus (Hymenoptera: Crabronidae), with a key to described Australian species. Journal of Hymenoptera Research 11: 101-133	Article in Journal	USA	yes	Journal of Hymenoptera Research	na	na
Apoidea	Hymenoptera	Arpactophilus		transversus		Valid	Species	Y	Matthews & Naumann	2002	Matthews, R.W. & Naumann, I.D.	2	no	1913	Matthews, R.W. & Naumann, I.D. 2002. Descriptions and biology of nine new species of Arpactophilus (Hymenoptera: Crabronidae), with a key to described Australian species. Journal of Hymenoptera Research 11: 101-133	Article in Journal	USA	yes	Journal of Hymenoptera Research	na	na
Apoidea	Hymenoptera	Austrogorytes		cardaleae		Valid	Species	Y	Bohart	1984	Bohart, R.M.	1	no	343	Bohart, R.M. 1984. A revision of the genus Austrogorytes Bohart (Hymenoptera: Sphecidae). Australian Journal of Zoology 32: 391-412	Article in Journal	Australia	no	Australian Journal of Zoology	agency	CSIRO
Apoidea	Hymenoptera	Austrogorytes		carinatus		Valid	Species	Y	Bohart	1984	Bohart, R.M.	1	no	343	Bohart, R.M. 1984. A revision of the genus Austrogorytes Bohart (Hymenoptera: Sphecidae). Australian Journal of Zoology 32: 391-412	Article in Journal	Australia	no	Australian Journal of Zoology	agency	CSIRO
Apoidea	Hymenoptera	Austrogorytes		evansi		Valid	Species	Y	Bohart	1984	Bohart, R.M.	1	no	343	Bohart, R.M. 1984. A revision of the genus Austrogorytes Bohart (Hymenoptera: Sphecidae). Australian Journal of Zoology 32: 391-412	Article in Journal	Australia	no	Australian Journal of Zoology	agency	CSIRO
Apoidea	Hymenoptera	Austrogorytes		exleyae		Valid	Species	Y	Bohart	1984	Bohart, R.M.	1	no	343	Bohart, R.M. 1984. A revision of the genus Austrogorytes Bohart (Hymenoptera: Sphecidae). Australian Journal of Zoology 32: 391-412	Article in Journal	Australia	no	Australian Journal of Zoology	agency	CSIRO
Apoidea	Hymenoptera	Austrogorytes		fimbriatus		Valid	Species	Y	Bohart	1984	Bohart, R.M.	1	no	343	Bohart, R.M. 1984. A revision of the genus Austrogorytes Bohart (Hymenoptera: Sphecidae). Australian Journal of Zoology 32: 391-412	Article in Journal	Australia	no	Australian Journal of Zoology	agency	CSIRO
Apoidea	Hymenoptera	Austrogorytes		grahami		Valid	Species	Y	Bohart	1984	Bohart, R.M.	1	no	343	Bohart, R.M. 1984. A revision of the genus Austrogorytes Bohart (Hymenoptera: Sphecidae). Australian Journal of Zoology 32: 391-412	Article in Journal	Australia	no	Australian Journal of Zoology	agency	CSIRO
Apoidea	Hymenoptera	Austrogorytes		houstoni		Valid	Species	Y	Bohart	1984	Bohart, R.M.	1	no	343	Bohart, R.M. 1984. A revision of the genus Austrogorytes Bohart (Hymenoptera: Sphecidae). Australian Journal of Zoology 32: 391-412	Article in Journal	Australia	no	Australian Journal of Zoology	agency	CSIRO
Apoidea	Hymenoptera	Austrogorytes		humphreysi		Valid	Species	Y	Bohart	1984	Bohart, R.M.	1	no	343	Bohart, R.M. 1984. A revision of the genus Austrogorytes Bohart (Hymenoptera: Sphecidae). Australian Journal of Zoology 32: 391-412	Article in Journal	Australia	no	Australian Journal of Zoology	agency	CSIRO
Apoidea	Hymenoptera	Austrogorytes		interruptus		Valid	Species	Y	Bohart	1984	Bohart, R.M.	1	no	343	Bohart, R.M. 1984. A revision of the genus Austrogorytes Bohart (Hymenoptera: Sphecidae). Australian Journal of Zoology 32: 391-412	Article in Journal	Australia	no	Australian Journal of Zoology	agency	CSIRO
Apoidea	Hymenoptera	Austrogorytes		meesi		Valid	Species	Y	Bohart	1984	Bohart, R.M.	1	no	343	Bohart, R.M. 1984. A revision of the genus Austrogorytes Bohart (Hymenoptera: Sphecidae). Australian Journal of Zoology 32: 391-412	Article in Journal	Australia	no	Australian Journal of Zoology	agency	CSIRO
Apoidea	Hymenoptera	Austrogorytes		musgravei		Valid	Species	Y	Bohart	1984	Bohart, R.M.	1	no	343	Bohart, R.M. 1984. A revision of the genus Austrogorytes Bohart (Hymenoptera: Sphecidae). Australian Journal of Zoology 32: 391-412	Article in Journal	Australia	no	Australian Journal of Zoology	agency	CSIRO
Apoidea	Hymenoptera	Austrogorytes		naumanni		Valid	Species	Y	Bohart	1984	Bohart, R.M.	1	no	343	Bohart, R.M. 1984. A revision of the genus Austrogorytes Bohart (Hymenoptera: Sphecidae). Australian Journal of Zoology 32: 391-412	Article in Journal	Australia	no	Australian Journal of Zoology	agency	CSIRO
Apoidea	Hymenoptera	Austrogorytes		norrisi		Valid	Species	Y	Bohart	1984	Bohart, R.M.	1	no	343	Bohart, R.M. 1984. A revision of the genus Austrogorytes Bohart (Hymenoptera: Sphecidae). Australian Journal of Zoology 32: 391-412	Article in Journal	Australia	no	Australian Journal of Zoology	agency	CSIRO
Apoidea	Hymenoptera	Austrogorytes		occidentalis		Valid	Species	Y	Bohart	1984	Bohart, R.M.	1	no	343	Bohart, R.M. 1984. A revision of the genus Austrogorytes Bohart (Hymenoptera: Sphecidae). Australian Journal of Zoology 32: 391-412	Article in Journal	Australia	no	Australian Journal of Zoology	agency	CSIRO
Apoidea	Hymenoptera	Austrogorytes		permaculatus		Valid	Species	Y	Bohart	1984	Bohart, R.M.	1	no	343	Bohart, R.M. 1984. A revision of the genus Austrogorytes Bohart (Hymenoptera: Sphecidae). Australian Journal of Zoology 32: 391-412	Article in Journal	Australia	no	Australian Journal of Zoology	agency	CSIRO
Apoidea	Hymenoptera	Austrogorytes		rieki		Valid	Species	Y	Bohart	1984	Bohart, R.M.	1	no	343	Bohart, R.M. 1984. A revision of the genus Austrogorytes Bohart (Hymenoptera: Sphecidae). Australian Journal of Zoology 32: 391-412	Article in Journal	Australia	no	Australian Journal of Zoology	agency	CSIRO
Apoidea	Hymenoptera	Austrogorytes		rufidulus		Valid	Species	Y	Bohart	1984	Bohart, R.M.	1	no	343	Bohart, R.M. 1984. A revision of the genus Austrogorytes Bohart (Hymenoptera: Sphecidae). Australian Journal of Zoology 32: 391-412	Article in Journal	Australia	no	Australian Journal of Zoology	agency	CSIRO
Apoidea	Hymenoptera	Austrogorytes		tindalei		Valid	Species	Y	Bohart	1984	Bohart, R.M.	1	no	343	Bohart, R.M. 1984. A revision of the genus Austrogorytes Bohart (Hymenoptera: Sphecidae). Australian Journal of Zoology 32: 391-412	Article in Journal	Australia	no	Australian Journal of Zoology	agency	CSIRO
Apoidea	Hymenoptera	Austrogorytes		turneri		Valid	Species	Y	Bohart	1984	Bohart, R.M.	1	no	343	Bohart, R.M. 1984. A revision of the genus Austrogorytes Bohart (Hymenoptera: Sphecidae). Australian Journal of Zoology 32: 391-412	Article in Journal	Australia	no	Australian Journal of Zoology	agency	CSIRO
Apoidea	Hymenoptera	Bembecinus		tinkeri		Valid	Species	Y	Bohart	1997	Bohart, R.M.	1	no	346	Bohart, R.M. 1997. Notes on Bembecinus of southern Africa, Madagascar, and Australia with descriptions of new species (Hymenoptera, Sphecidae, Nyssoninae, Stizini). Journal of Hymenoptera Research 6: 163-177	Article in Journal	USA	yes	Journal of Hymenoptera Research	na	na
Apoidea	Hymenoptera	Bembix		allunga		Valid	Species	Y	Evans & Matthews	1973	Evans, H.E. & Matthews, R.W.	2	no	952	Evans, H.E. & Matthews, R.W. 1973. Systematics and nesting behavior of Australian Bembix sand wasps (Hymenoptera, Sphecidae). Memoirs of the American Entomological Institute 20: iv, 1-387 [Date published 31/12/1973]	Article in Journal	USA	yes	Memoirs of the American Entomological Institute	na	na
Apoidea	Hymenoptera	Bembix		baringa		Valid	Species	Y	Evans & Matthews	1973	Evans, H.E. & Matthews, R.W.	2	no	952	Evans, H.E. & Matthews, R.W. 1973. Systematics and nesting behavior of Australian Bembix sand wasps (Hymenoptera, Sphecidae). Memoirs of the American Entomological Institute 20: iv, 1-387 [Date published 31/12/1973]	Article in Journal	USA	yes	Memoirs of the American Entomological Institute	na	na
Apoidea	Hymenoptera	Bembix		berontha		Valid	Species	Y	Evans & Matthews	1973	Evans, H.E. & Matthews, R.W.	2	no	952	Evans, H.E. & Matthews, R.W. 1973. Systematics and nesting behavior of Australian Bembix sand wasps (Hymenoptera, Sphecidae). Memoirs of the American Entomological Institute 20: iv, 1-387 [Date published 31/12/1973]	Article in Journal	USA	yes	Memoirs of the American Entomological Institute	na	na
Apoidea	Hymenoptera	Bembix		boaliri		Valid	Species	Y	Evans & Matthews	1973	Evans, H.E. & Matthews, R.W.	2	no	952	Evans, H.E. & Matthews, R.W. 1973. Systematics and nesting behavior of Australian Bembix sand wasps (Hymenoptera, Sphecidae). Memoirs of the American Entomological Institute 20: iv, 1-387 [Date published 31/12/1973]	Article in Journal	USA	yes	Memoirs of the American Entomological Institute	na	na
Apoidea	Hymenoptera	Bembix		boonamin		Valid	Species	Y	Evans & Matthews	1973	Evans, H.E. & Matthews, R.W.	2	no	952	Evans, H.E. & Matthews, R.W. 1973. Systematics and nesting behavior of Australian Bembix sand wasps (Hymenoptera, Sphecidae). Memoirs of the American Entomological Institute 20: iv, 1-387 [Date published 31/12/1973]	Article in Journal	USA	yes	Memoirs of the American Entomological Institute	na	na
Apoidea	Hymenoptera	Bembix		buntor		Valid	Species	Y	Evans & Matthews	1973	Evans, H.E. & Matthews, R.W.	2	no	952	Evans, H.E. & Matthews, R.W. 1973. Systematics and nesting behavior of Australian Bembix sand wasps (Hymenoptera, Sphecidae). Memoirs of the American Entomological Institute 20: iv, 1-387 [Date published 31/12/1973]	Article in Journal	USA	yes	Memoirs of the American Entomological Institute	na	na
Apoidea	Hymenoptera	Bembix		burando		Valid	Species	Y	Evans & Matthews	1973	Evans, H.E. & Matthews, R.W.	2	no	952	Evans, H.E. & Matthews, R.W. 1973. Systematics and nesting behavior of Australian Bembix sand wasps (Hymenoptera, Sphecidae). Memoirs of the American Entomological Institute 20: iv, 1-387 [Date published 31/12/1973]	Article in Journal	USA	yes	Memoirs of the American Entomological Institute	na	na
Apoidea	Hymenoptera	Bembix		burraburra		Valid	Species	Y	Evans & Matthews	1973	Evans, H.E. & Matthews, R.W.	2	no	952	Evans, H.E. & Matthews, R.W. 1973. Systematics and nesting behavior of Australian Bembix sand wasps (Hymenoptera, Sphecidae). Memoirs of the American Entomological Institute 20: iv, 1-387 [Date published 31/12/1973]	Article in Journal	USA	yes	Memoirs of the American Entomological Institute	na	na
Apoidea	Hymenoptera	Bembix		carripan		Valid	Species	Y	Evans & Matthews	1973	Evans, H.E. & Matthews, R.W.	2	no	952	Evans, H.E. & Matthews, R.W. 1973. Systematics and nesting behavior of Australian Bembix sand wasps (Hymenoptera, Sphecidae). Memoirs of the American Entomological Institute 20: iv, 1-387 [Date published 31/12/1973]	Article in Journal	USA	yes	Memoirs of the American Entomological Institute	na	na
Apoidea	Hymenoptera	Bembix		cooba		Valid	Species	Y	Evans & Matthews	1973	Evans, H.E. & Matthews, R.W.	2	no	952	Evans, H.E. & Matthews, R.W. 1973. Systematics and nesting behavior of Australian Bembix sand wasps (Hymenoptera, Sphecidae). Memoirs of the American Entomological Institute 20: iv, 1-387 [Date published 31/12/1973]	Article in Journal	USA	yes	Memoirs of the American Entomological Institute	na	na
Apoidea	Hymenoptera	Bembix		coonundura		Valid	Species	Y	Evans & Matthews	1973	Evans, H.E. & Matthews, R.W.	2	no	952	Evans, H.E. & Matthews, R.W. 1973. Systematics and nesting behavior of Australian Bembix sand wasps (Hymenoptera, Sphecidae). Memoirs of the American Entomological Institute 20: iv, 1-387 [Date published 31/12/1973]	Article in Journal	USA	yes	Memoirs of the American Entomological Institute	na	na
Apoidea	Hymenoptera	Bembix		eleebana		Valid	Species	Y	Evans & Matthews	1973	Evans, H.E. & Matthews, R.W.	2	no	952	Evans, H.E. & Matthews, R.W. 1973. Systematics and nesting behavior of Australian Bembix sand wasps (Hymenoptera, Sphecidae). Memoirs of the American Entomological Institute 20: iv, 1-387 [Date published 31/12/1973]	Article in Journal	USA	yes	Memoirs of the American Entomological Institute	na	na
Apoidea	Hymenoptera	Bembix		eucla		Valid	Species	Y	Evans	1990	Evans, H.E.	1	no	951	Evans, H.E. 1990. New Australian species and records of the promontorii group of the genus Bembix F. (Hymenoptera: Sphecidae: Nyssoninae). Journal of the Australian Entomological Society 29: 27-30	Article in Journal	Australia	yes	Journal of the Australian Entomological Society	society	AustEntSoc
Apoidea	Hymenoptera	Bembix		gelane		Valid	Species	Y	Evans & Matthews	1973	Evans, H.E. & Matthews, R.W.	2	no	952	Evans, H.E. & Matthews, R.W. 1973. Systematics and nesting behavior of Australian Bembix sand wasps (Hymenoptera, Sphecidae). Memoirs of the American Entomological Institute 20: iv, 1-387 [Date published 31/12/1973]	Article in Journal	USA	yes	Memoirs of the American Entomological Institute	na	na
Apoidea	Hymenoptera	Bembix		ginjulla		Valid	Species	Y	Evans & Matthews	1973	Evans, H.E. & Matthews, R.W.	2	no	952	Evans, H.E. & Matthews, R.W. 1973. Systematics and nesting behavior of Australian Bembix sand wasps (Hymenoptera, Sphecidae). Memoirs of the American Entomological Institute 20: iv, 1-387 [Date published 31/12/1973]	Article in Journal	USA	yes	Memoirs of the American Entomological Institute	na	na
Apoidea	Hymenoptera	Bembix		goyarra		Valid	Species	Y	Evans & Matthews	1973	Evans, H.E. & Matthews, R.W.	2	no	952	Evans, H.E. & Matthews, R.W. 1973. Systematics and nesting behavior of Australian Bembix sand wasps (Hymenoptera, Sphecidae). Memoirs of the American Entomological Institute 20: iv, 1-387 [Date published 31/12/1973]	Article in Journal	USA	yes	Memoirs of the American Entomological Institute	na	na
Apoidea	Hymenoptera	Bembix		gunamarra		Valid	Species	Y	Evans & Matthews	1973	Evans, H.E. & Matthews, R.W.	2	no	952	Evans, H.E. & Matthews, R.W. 1973. Systematics and nesting behavior of Australian Bembix sand wasps (Hymenoptera, Sphecidae). Memoirs of the American Entomological Institute 20: iv, 1-387 [Date published 31/12/1973]	Article in Journal	USA	yes	Memoirs of the American Entomological Institute	na	na
Apoidea	Hymenoptera	Bembix		gurindji		Valid	Species	Y	Evans	1982	Evans, H.E.	1	no	948	Evans, H.E. 1982. Two new species of Australian Bembix sand wasps, with notes on other species of the genus (Hymenoptera, Sphecidae). Australian Entomological Magazine 9: 7-12	Article in Journal	Australia	yes	Australian Entomological Magazine	society	EntSocQld
Apoidea	Hymenoptera	Bembix		hokarra		Valid	Species	Y	Evans & Matthews	1973	Evans, H.E. & Matthews, R.W.	2	no	952	Evans, H.E. & Matthews, R.W. 1973. Systematics and nesting behavior of Australian Bembix sand wasps (Hymenoptera, Sphecidae). Memoirs of the American Entomological Institute 20: iv, 1-387 [Date published 31/12/1973]	Article in Journal	USA	yes	Memoirs of the American Entomological Institute	na	na
Apoidea	Hymenoptera	Bembix		kamulla		Valid	Species	Y	Evans & Matthews	1973	Evans, H.E. & Matthews, R.W.	2	no	952	Evans, H.E. & Matthews, R.W. 1973. Systematics and nesting behavior of Australian Bembix sand wasps (Hymenoptera, Sphecidae). Memoirs of the American Entomological Institute 20: iv, 1-387 [Date published 31/12/1973]	Article in Journal	USA	yes	Memoirs of the American Entomological Institute	na	na
Apoidea	Hymenoptera	Bembix		kora		Valid	Species	Y	Evans & Matthews	1973	Evans, H.E. & Matthews, R.W.	2	no	952	Evans, H.E. & Matthews, R.W. 1973. Systematics and nesting behavior of Australian Bembix sand wasps (Hymenoptera, Sphecidae). Memoirs of the American Entomological Institute 20: iv, 1-387 [Date published 31/12/1973]	Article in Journal	USA	yes	Memoirs of the American Entomological Institute	na	na
Apoidea	Hymenoptera	Bembix		kununurra		Valid	Species	Y	Evans & Matthews	1973	Evans, H.E. & Matthews, R.W.	2	no	952	Evans, H.E. & Matthews, R.W. 1973. Systematics and nesting behavior of Australian Bembix sand wasps (Hymenoptera, Sphecidae). Memoirs of the American Entomological Institute 20: iv, 1-387 [Date published 31/12/1973]	Article in Journal	USA	yes	Memoirs of the American Entomological Institute	na	na
Apoidea	Hymenoptera	Bembix		loorea		Valid	Species	Y	Evans & Matthews	1973	Evans, H.E. & Matthews, R.W.	2	no	952	Evans, H.E. & Matthews, R.W. 1973. Systematics and nesting behavior of Australian Bembix sand wasps (Hymenoptera, Sphecidae). Memoirs of the American Entomological Institute 20: iv, 1-387 [Date published 31/12/1973]	Article in Journal	USA	yes	Memoirs of the American Entomological Institute	na	na
Apoidea	Hymenoptera	Bembix		magarra		Valid	Species	Y	Evans & Matthews	1973	Evans, H.E. & Matthews, R.W.	2	no	952	Evans, H.E. & Matthews, R.W. 1973. Systematics and nesting behavior of Australian Bembix sand wasps (Hymenoptera, Sphecidae). Memoirs of the American Entomological Institute 20: iv, 1-387 [Date published 31/12/1973]	Article in Journal	USA	yes	Memoirs of the American Entomological Institute	na	na
Apoidea	Hymenoptera	Bembix		maliki		Valid	Species	Y	Evans & Matthews	1973	Evans, H.E. & Matthews, R.W.	2	no	952	Evans, H.E. & Matthews, R.W. 1973. Systematics and nesting behavior of Australian Bembix sand wasps (Hymenoptera, Sphecidae). Memoirs of the American Entomological Institute 20: iv, 1-387 [Date published 31/12/1973]	Article in Journal	USA	yes	Memoirs of the American Entomological Institute	na	na
Apoidea	Hymenoptera	Bembix		mareeba		Valid	Species	Y	Evans & Matthews	1973	Evans, H.E. & Matthews, R.W.	2	no	952	Evans, H.E. & Matthews, R.W. 1973. Systematics and nesting behavior of Australian Bembix sand wasps (Hymenoptera, Sphecidae). Memoirs of the American Entomological Institute 20: iv, 1-387 [Date published 31/12/1973]	Article in Journal	USA	yes	Memoirs of the American Entomological Institute	na	na
Apoidea	Hymenoptera	Bembix		marhra		Valid	Species	Y	Evans & Matthews	1973	Evans, H.E. & Matthews, R.W.	2	no	952	Evans, H.E. & Matthews, R.W. 1973. Systematics and nesting behavior of Australian Bembix sand wasps (Hymenoptera, Sphecidae). Memoirs of the American Entomological Institute 20: iv, 1-387 [Date published 31/12/1973]	Article in Journal	USA	yes	Memoirs of the American Entomological Institute	na	na
Apoidea	Hymenoptera	Bembix		mianga		Valid	Species	Y	Evans & Matthews	1973	Evans, H.E. & Matthews, R.W.	2	no	952	Evans, H.E. & Matthews, R.W. 1973. Systematics and nesting behavior of Australian Bembix sand wasps (Hymenoptera, Sphecidae). Memoirs of the American Entomological Institute 20: iv, 1-387 [Date published 31/12/1973]	Article in Journal	USA	yes	Memoirs of the American Entomological Institute	na	na
Apoidea	Hymenoptera	Bembix		minya		Valid	Species	Y	Evans & Matthews	1973	Evans, H.E. & Matthews, R.W.	2	no	952	Evans, H.E. & Matthews, R.W. 1973. Systematics and nesting behavior of Australian Bembix sand wasps (Hymenoptera, Sphecidae). Memoirs of the American Entomological Institute 20: iv, 1-387 [Date published 31/12/1973]	Article in Journal	USA	yes	Memoirs of the American Entomological Institute	na	na
Apoidea	Hymenoptera	Bembix		mokari		Valid	Species	Y	Evans & Matthews	1973	Evans, H.E. & Matthews, R.W.	2	no	952	Evans, H.E. & Matthews, R.W. 1973. Systematics and nesting behavior of Australian Bembix sand wasps (Hymenoptera, Sphecidae). Memoirs of the American Entomological Institute 20: iv, 1-387 [Date published 31/12/1973]	Article in Journal	USA	yes	Memoirs of the American Entomological Institute	na	na
Apoidea	Hymenoptera	Bembix		moma		Valid	Species	Y	Evans & Matthews	1973	Evans, H.E. & Matthews, R.W.	2	no	952	Evans, H.E. & Matthews, R.W. 1973. Systematics and nesting behavior of Australian Bembix sand wasps (Hymenoptera, Sphecidae). Memoirs of the American Entomological Institute 20: iv, 1-387 [Date published 31/12/1973]	Article in Journal	USA	yes	Memoirs of the American Entomological Institute	na	na
Apoidea	Hymenoptera	Bembix		moonga		Valid	Species	Y	Evans & Matthews	1973	Evans, H.E. & Matthews, R.W.	2	no	952	Evans, H.E. & Matthews, R.W. 1973. Systematics and nesting behavior of Australian Bembix sand wasps (Hymenoptera, Sphecidae). Memoirs of the American Entomological Institute 20: iv, 1-387 [Date published 31/12/1973]	Article in Journal	USA	yes	Memoirs of the American Entomological Institute	na	na
Apoidea	Hymenoptera	Bembix		mundurra		Valid	Species	Y	Evans & Matthews	1973	Evans, H.E. & Matthews, R.W.	2	no	952	Evans, H.E. & Matthews, R.W. 1973. Systematics and nesting behavior of Australian Bembix sand wasps (Hymenoptera, Sphecidae). Memoirs of the American Entomological Institute 20: iv, 1-387 [Date published 31/12/1973]	Article in Journal	USA	yes	Memoirs of the American Entomological Institute	na	na
Apoidea	Hymenoptera	Bembix		munta		Valid	Species	Y	Evans & Matthews	1973	Evans, H.E. & Matthews, R.W.	2	no	952	Evans, H.E. & Matthews, R.W. 1973. Systematics and nesting behavior of Australian Bembix sand wasps (Hymenoptera, Sphecidae). Memoirs of the American Entomological Institute 20: iv, 1-387 [Date published 31/12/1973]	Article in Journal	USA	yes	Memoirs of the American Entomological Institute	na	na
Apoidea	Hymenoptera	Bembix		obiri		Valid	Species	Y	Evans	1982	Evans, H.E.	1	no	948	Evans, H.E. 1982. Two new species of Australian Bembix sand wasps, with notes on other species of the genus (Hymenoptera, Sphecidae). Australian Entomological Magazine 9: 7-12	Article in Journal	Australia	yes	Australian Entomological Magazine	society	EntSocQld
Apoidea	Hymenoptera	Bembix		olba		Valid	Species	Y	Evans & Matthews	1973	Evans, H.E. & Matthews, R.W.	2	no	952	Evans, H.E. & Matthews, R.W. 1973. Systematics and nesting behavior of Australian Bembix sand wasps (Hymenoptera, Sphecidae). Memoirs of the American Entomological Institute 20: iv, 1-387 [Date published 31/12/1973]	Article in Journal	USA	yes	Memoirs of the American Entomological Institute	na	na
Apoidea	Hymenoptera	Bembix		oomborra		Valid	Species	Y	Evans & Matthews	1973	Evans, H.E. & Matthews, R.W.	2	no	952	Evans, H.E. & Matthews, R.W. 1973. Systematics and nesting behavior of Australian Bembix sand wasps (Hymenoptera, Sphecidae). Memoirs of the American Entomological Institute 20: iv, 1-387 [Date published 31/12/1973]	Article in Journal	USA	yes	Memoirs of the American Entomological Institute	na	na
Apoidea	Hymenoptera	Bembix		ourapilla		Valid	Species	Y	Evans & Matthews	1973	Evans, H.E. & Matthews, R.W.	2	no	952	Evans, H.E. & Matthews, R.W. 1973. Systematics and nesting behavior of Australian Bembix sand wasps (Hymenoptera, Sphecidae). Memoirs of the American Entomological Institute 20: iv, 1-387 [Date published 31/12/1973]	Article in Journal	USA	yes	Memoirs of the American Entomological Institute	na	na
Apoidea	Hymenoptera	Bembix		palona		Valid	Species	Y	Evans & Matthews	1973	Evans, H.E. & Matthews, R.W.	2	no	952	Evans, H.E. & Matthews, R.W. 1973. Systematics and nesting behavior of Australian Bembix sand wasps (Hymenoptera, Sphecidae). Memoirs of the American Entomological Institute 20: iv, 1-387 [Date published 31/12/1973]	Article in Journal	USA	yes	Memoirs of the American Entomological Institute	na	na
Apoidea	Hymenoptera	Bembix		pikati		Valid	Species	Y	Evans & Matthews	1973	Evans, H.E. & Matthews, R.W.	2	no	952	Evans, H.E. & Matthews, R.W. 1973. Systematics and nesting behavior of Australian Bembix sand wasps (Hymenoptera, Sphecidae). Memoirs of the American Entomological Institute 20: iv, 1-387 [Date published 31/12/1973]	Article in Journal	USA	yes	Memoirs of the American Entomological Institute	na	na
Apoidea	Hymenoptera	Bembix		pillara		Valid	Species	Y	Evans & Matthews	1973	Evans, H.E. & Matthews, R.W.	2	no	952	Evans, H.E. & Matthews, R.W. 1973. Systematics and nesting behavior of Australian Bembix sand wasps (Hymenoptera, Sphecidae). Memoirs of the American Entomological Institute 20: iv, 1-387 [Date published 31/12/1973]	Article in Journal	USA	yes	Memoirs of the American Entomological Institute	na	na
Apoidea	Hymenoptera	Bembix		pulka		Valid	Species	Y	Evans & Matthews	1973	Evans, H.E. & Matthews, R.W.	2	no	952	Evans, H.E. & Matthews, R.W. 1973. Systematics and nesting behavior of Australian Bembix sand wasps (Hymenoptera, Sphecidae). Memoirs of the American Entomological Institute 20: iv, 1-387 [Date published 31/12/1973]	Article in Journal	USA	yes	Memoirs of the American Entomological Institute	na	na
Apoidea	Hymenoptera	Bembix		tangadee		Valid	Species	Y	Evans	1990	Evans, H.E.	1	no	951	Evans, H.E. 1990. New Australian species and records of the promontorii group of the genus Bembix F. (Hymenoptera: Sphecidae: Nyssoninae). Journal of the Australian Entomological Society 29: 27-30	Article in Journal	Australia	yes	Journal of the Australian Entomological Society	society	AustEntSoc
Apoidea	Hymenoptera	Bembix		thooma		Valid	Species	Y	Evans & Matthews	1973	Evans, H.E. & Matthews, R.W.	2	no	952	Evans, H.E. & Matthews, R.W. 1973. Systematics and nesting behavior of Australian Bembix sand wasps (Hymenoptera, Sphecidae). Memoirs of the American Entomological Institute 20: iv, 1-387 [Date published 31/12/1973]	Article in Journal	USA	yes	Memoirs of the American Entomological Institute	na	na
Apoidea	Hymenoptera	Bembix		tibooburra		Valid	Species	Y	Evans & Matthews	1973	Evans, H.E. & Matthews, R.W.	2	no	952	Evans, H.E. & Matthews, R.W. 1973. Systematics and nesting behavior of Australian Bembix sand wasps (Hymenoptera, Sphecidae). Memoirs of the American Entomological Institute 20: iv, 1-387 [Date published 31/12/1973]	Article in Journal	USA	yes	Memoirs of the American Entomological Institute	na	na
Apoidea	Hymenoptera	Bembix		uloola		Valid	Species	Y	Evans & Matthews	1973	Evans, H.E. & Matthews, R.W.	2	no	952	Evans, H.E. & Matthews, R.W. 1973. Systematics and nesting behavior of Australian Bembix sand wasps (Hymenoptera, Sphecidae). Memoirs of the American Entomological Institute 20: iv, 1-387 [Date published 31/12/1973]	Article in Journal	USA	yes	Memoirs of the American Entomological Institute	na	na
Apoidea	Hymenoptera	Bembix		undeneya		Valid	Species	Y	Evans & Matthews	1973	Evans, H.E. & Matthews, R.W.	2	no	952	Evans, H.E. & Matthews, R.W. 1973. Systematics and nesting behavior of Australian Bembix sand wasps (Hymenoptera, Sphecidae). Memoirs of the American Entomological Institute 20: iv, 1-387 [Date published 31/12/1973]	Article in Journal	USA	yes	Memoirs of the American Entomological Institute	na	na
Apoidea	Hymenoptera	Bembix		wadamiri		Valid	Species	Y	Evans & Matthews	1973	Evans, H.E. & Matthews, R.W.	2	no	952	Evans, H.E. & Matthews, R.W. 1973. Systematics and nesting behavior of Australian Bembix sand wasps (Hymenoptera, Sphecidae). Memoirs of the American Entomological Institute 20: iv, 1-387 [Date published 31/12/1973]	Article in Journal	USA	yes	Memoirs of the American Entomological Institute	na	na
Apoidea	Hymenoptera	Bembix		wangoola		Valid	Species	Y	Evans & Matthews	1973	Evans, H.E. & Matthews, R.W.	2	no	952	Evans, H.E. & Matthews, R.W. 1973. Systematics and nesting behavior of Australian Bembix sand wasps (Hymenoptera, Sphecidae). Memoirs of the American Entomological Institute 20: iv, 1-387 [Date published 31/12/1973]	Article in Journal	USA	yes	Memoirs of the American Entomological Institute	na	na
Apoidea	Hymenoptera	Bembix		wanna		Valid	Species	Y	Evans & Matthews	1973	Evans, H.E. & Matthews, R.W.	2	no	952	Evans, H.E. & Matthews, R.W. 1973. Systematics and nesting behavior of Australian Bembix sand wasps (Hymenoptera, Sphecidae). Memoirs of the American Entomological Institute 20: iv, 1-387 [Date published 31/12/1973]	Article in Journal	USA	yes	Memoirs of the American Entomological Institute	na	na
Apoidea	Hymenoptera	Bembix		warawara		Valid	Species	Y	Evans & Matthews	1973	Evans, H.E. & Matthews, R.W.	2	no	952	Evans, H.E. & Matthews, R.W. 1973. Systematics and nesting behavior of Australian Bembix sand wasps (Hymenoptera, Sphecidae). Memoirs of the American Entomological Institute 20: iv, 1-387 [Date published 31/12/1973]	Article in Journal	USA	yes	Memoirs of the American Entomological Institute	na	na
Apoidea	Hymenoptera	Bembix		weema		Valid	Species	Y	Evans & Matthews	1973	Evans, H.E. & Matthews, R.W.	2	no	952	Evans, H.E. & Matthews, R.W. 1973. Systematics and nesting behavior of Australian Bembix sand wasps (Hymenoptera, Sphecidae). Memoirs of the American Entomological Institute 20: iv, 1-387 [Date published 31/12/1973]	Article in Journal	USA	yes	Memoirs of the American Entomological Institute	na	na
Apoidea	Hymenoptera	Bembix		wilcannia		Valid	Species	Y	Evans & Matthews	1973	Evans, H.E. & Matthews, R.W.	2	no	952	Evans, H.E. & Matthews, R.W. 1973. Systematics and nesting behavior of Australian Bembix sand wasps (Hymenoptera, Sphecidae). Memoirs of the American Entomological Institute 20: iv, 1-387 [Date published 31/12/1973]	Article in Journal	USA	yes	Memoirs of the American Entomological Institute	na	na
Apoidea	Hymenoptera	Bembix		wiluna		Valid	Species	Y	Evans & Matthews	1973	Evans, H.E. & Matthews, R.W.	2	no	952	Evans, H.E. & Matthews, R.W. 1973. Systematics and nesting behavior of Australian Bembix sand wasps (Hymenoptera, Sphecidae). Memoirs of the American Entomological Institute 20: iv, 1-387 [Date published 31/12/1973]	Article in Journal	USA	yes	Memoirs of the American Entomological Institute	na	na
Apoidea	Hymenoptera	Bembix		wollowra		Valid	Species	Y	Evans & Matthews	1973	Evans, H.E. & Matthews, R.W.	2	no	952	Evans, H.E. & Matthews, R.W. 1973. Systematics and nesting behavior of Australian Bembix sand wasps (Hymenoptera, Sphecidae). Memoirs of the American Entomological Institute 20: iv, 1-387 [Date published 31/12/1973]	Article in Journal	USA	yes	Memoirs of the American Entomological Institute	na	na
Apoidea	Hymenoptera	Bembix		wolpa		Valid	Species	Y	Evans & Matthews	1973	Evans, H.E. & Matthews, R.W.	2	no	952	Evans, H.E. & Matthews, R.W. 1973. Systematics and nesting behavior of Australian Bembix sand wasps (Hymenoptera, Sphecidae). Memoirs of the American Entomological Institute 20: iv, 1-387 [Date published 31/12/1973]	Article in Journal	USA	yes	Memoirs of the American Entomological Institute	na	na
Apoidea	Hymenoptera	Bembix		wowine		Valid	Species	Y	Evans & Matthews	1973	Evans, H.E. & Matthews, R.W.	2	no	952	Evans, H.E. & Matthews, R.W. 1973. Systematics and nesting behavior of Australian Bembix sand wasps (Hymenoptera, Sphecidae). Memoirs of the American Entomological Institute 20: iv, 1-387 [Date published 31/12/1973]	Article in Journal	USA	yes	Memoirs of the American Entomological Institute	na	na
Apoidea	Hymenoptera	Bembix		yalta		Valid	Species	Y	Evans & Matthews	1973	Evans, H.E. & Matthews, R.W.	2	no	952	Evans, H.E. & Matthews, R.W. 1973. Systematics and nesting behavior of Australian Bembix sand wasps (Hymenoptera, Sphecidae). Memoirs of the American Entomological Institute 20: iv, 1-387 [Date published 31/12/1973]	Article in Journal	USA	yes	Memoirs of the American Entomological Institute	na	na
Apoidea	Hymenoptera	Bembix		yunkara		Valid	Species	Y	Evans & Matthews	1973	Evans, H.E. & Matthews, R.W.	2	no	952	Evans, H.E. & Matthews, R.W. 1973. Systematics and nesting behavior of Australian Bembix sand wasps (Hymenoptera, Sphecidae). Memoirs of the American Entomological Institute 20: iv, 1-387 [Date published 31/12/1973]	Article in Journal	USA	yes	Memoirs of the American Entomological Institute	na	na
Apoidea	Hymenoptera	Brachyhesma	Anomalohesma	scapata		Valid	Species	Y	Exley	1977	Exley, E.M.	1	no	994	Exley, E.M. 1977. The Australian genus Brachyhesma (Apoidea: Colletidae) revised and reviewed. Australian Journal of Zoology Supplementary Series 53: 1-54 [Date published 31/12/1977]	Article in Journal	Australia	no	Australian Journal of Zoology Supplementary Series	agency	CSIRO
Apoidea	Hymenoptera	Brachyhesma	Brachyhesma	angularis		Valid	Species	Y	Exley	1977	Exley, E.M.	1	no	994	Exley, E.M. 1977. The Australian genus Brachyhesma (Apoidea: Colletidae) revised and reviewed. Australian Journal of Zoology Supplementary Series 53: 1-54 [Date published 31/12/1977]	Article in Journal	Australia	no	Australian Journal of Zoology Supplementary Series	agency	CSIRO
Apoidea	Hymenoptera	Brachyhesma	Brachyhesma	antennata		Valid	Species	Y	Exley	1977	Exley, E.M.	1	no	994	Exley, E.M. 1977. The Australian genus Brachyhesma (Apoidea: Colletidae) revised and reviewed. Australian Journal of Zoology Supplementary Series 53: 1-54 [Date published 31/12/1977]	Article in Journal	Australia	no	Australian Journal of Zoology Supplementary Series	agency	CSIRO
Apoidea	Hymenoptera	Brachyhesma	Brachyhesma	apicalis		Valid	Species	Y	Exley	1969	Exley, E.M.	1	no	979	Exley, E.M. 1969. A new species of Brachyhesma (Apoidea: Colletidae). Journal of the Australian Entomological Society 8: 134-136 [Date published 31/12/1969]	Article in Journal	Australia	yes	Journal of the Australian Entomological Society	society	AustEntSoc
Apoidea	Hymenoptera	Brachyhesma	Brachyhesma	aurata		Valid	Species	Y	Exley	1977	Exley, E.M.	1	no	994	Exley, E.M. 1977. The Australian genus Brachyhesma (Apoidea: Colletidae) revised and reviewed. Australian Journal of Zoology Supplementary Series 53: 1-54 [Date published 31/12/1977]	Article in Journal	Australia	no	Australian Journal of Zoology Supplementary Series	agency	CSIRO
Apoidea	Hymenoptera	Brachyhesma	Brachyhesma	barrowensis		Valid	Species	Y	Exley	1968	Exley, E.M.	1	no	975	Exley, E.M. 1968. Revision of the genus Brachyhesma Michener (Apoidea: Colletidae). Australian Journal of Zoology 16: 167-201 [Date published 31/12/1968]	Article in Journal	Australia	no	Australian Journal of Zoology	agency	CSIRO
Apoidea	Hymenoptera	Brachyhesma	Brachyhesma	carnarvonensis		Valid	Species	Y	Exley	1977	Exley, E.M.	1	no	994	Exley, E.M. 1977. The Australian genus Brachyhesma (Apoidea: Colletidae) revised and reviewed. Australian Journal of Zoology Supplementary Series 53: 1-54 [Date published 31/12/1977]	Article in Journal	Australia	no	Australian Journal of Zoology Supplementary Series	agency	CSIRO
Apoidea	Hymenoptera	Brachyhesma	Brachyhesma	dedari		Valid	Species	Y	Exley	1968	Exley, E.M.	1	no	975	Exley, E.M. 1968. Revision of the genus Brachyhesma Michener (Apoidea: Colletidae). Australian Journal of Zoology 16: 167-201 [Date published 31/12/1968]	Article in Journal	Australia	no	Australian Journal of Zoology	agency	CSIRO
Apoidea	Hymenoptera	Brachyhesma	Brachyhesma	femoralis		Valid	Species	Y	Exley	1977	Exley, E.M.	1	no	994	Exley, E.M. 1977. The Australian genus Brachyhesma (Apoidea: Colletidae) revised and reviewed. Australian Journal of Zoology Supplementary Series 53: 1-54 [Date published 31/12/1977]	Article in Journal	Australia	no	Australian Journal of Zoology Supplementary Series	agency	CSIRO
Apoidea	Hymenoptera	Brachyhesma	Brachyhesma	grossopedalis		Valid	Species	Y	Exley	1977	Exley, E.M.	1	no	994	Exley, E.M. 1977. The Australian genus Brachyhesma (Apoidea: Colletidae) revised and reviewed. Australian Journal of Zoology Supplementary Series 53: 1-54 [Date published 31/12/1977]	Article in Journal	Australia	no	Australian Journal of Zoology Supplementary Series	agency	CSIRO
Apoidea	Hymenoptera	Brachyhesma	Brachyhesma	houstoni		Valid	Species	Y	Exley	1968	Exley, E.M.	1	no	978	Exley, E.M. 1968. Three new species of Brachyhesma (Apoidea: Colletidae). Journal of the Australian Entomological Society 7: 135-141 [Date published 31/12/1968]	Article in Journal	Australia	yes	Journal of the Australian Entomological Society	society	AustEntSoc
Apoidea	Hymenoptera	Brachyhesma	Brachyhesma	isae		Valid	Species	Y	Exley	1977	Exley, E.M.	1	no	994	Exley, E.M. 1977. The Australian genus Brachyhesma (Apoidea: Colletidae) revised and reviewed. Australian Journal of Zoology Supplementary Series 53: 1-54 [Date published 31/12/1977]	Article in Journal	Australia	no	Australian Journal of Zoology Supplementary Series	agency	CSIRO
Apoidea	Hymenoptera	Brachyhesma	Brachyhesma	longicornis		Valid	Species	Y	Exley	1968	Exley, E.M.	1	no	975	Exley, E.M. 1968. Revision of the genus Brachyhesma Michener (Apoidea: Colletidae). Australian Journal of Zoology 16: 167-201 [Date published 31/12/1968]	Article in Journal	Australia	no	Australian Journal of Zoology	agency	CSIRO
Apoidea	Hymenoptera	Brachyhesma	Brachyhesma	matarankae		Valid	Species	Y	Exley	1977	Exley, E.M.	1	no	994	Exley, E.M. 1977. The Australian genus Brachyhesma (Apoidea: Colletidae) revised and reviewed. Australian Journal of Zoology Supplementary Series 53: 1-54 [Date published 31/12/1977]	Article in Journal	Australia	no	Australian Journal of Zoology Supplementary Series	agency	CSIRO
Apoidea	Hymenoptera	Brachyhesma	Brachyhesma	monteithae		Valid	Species	Y	Exley	1975	Exley, E.M.	1	no	989	Exley, E.M. 1975. New species and records of Brachyhesma Michener (Apoidea: Colletidae: Euryglossinae). Journal of the Australian Entomological Society 14: 139-144 [Date published 31/12/1975]	Article in Journal	Australia	yes	Journal of the Australian Entomological Society	society	AustEntSoc
Apoidea	Hymenoptera	Brachyhesma	Brachyhesma	morvenensis		Valid	Species	Y	Exley	1974	Exley, E.M.	1	no	987	Exley, E.M. 1974. A contribution to our knowledge of the bee fauna (Colletidae: Euryglossinae) of remote areas of Australia with descriptions of new species. Proceedings of the Royal Society of Queensland 85: 95-110 [Date published 31/12/1974]	Article in Journal	Australia	no	Proceedings of the Royal Society of Queensland	society	RoySocQld
Apoidea	Hymenoptera	Brachyhesma	Brachyhesma	nigricornis		Valid	Species	Y	Exley	1975	Exley, E.M.	1	no	989	Exley, E.M. 1975. New species and records of Brachyhesma Michener (Apoidea: Colletidae: Euryglossinae). Journal of the Australian Entomological Society 14: 139-144 [Date published 31/12/1975]	Article in Journal	Australia	yes	Journal of the Australian Entomological Society	society	AustEntSoc
Apoidea	Hymenoptera	Brachyhesma	Brachyhesma	renneri		Valid	Species	Y	Exley	1968	Exley, E.M.	1	no	975	Exley, E.M. 1968. Revision of the genus Brachyhesma Michener (Apoidea: Colletidae). Australian Journal of Zoology 16: 167-201 [Date published 31/12/1968]	Article in Journal	Australia	no	Australian Journal of Zoology	agency	CSIRO
Apoidea	Hymenoptera	Brachyhesma	Brachyhesma	triangularis		Valid	Species	Y	Exley	1977	Exley, E.M.	1	no	994	Exley, E.M. 1977. The Australian genus Brachyhesma (Apoidea: Colletidae) revised and reviewed. Australian Journal of Zoology Supplementary Series 53: 1-54 [Date published 31/12/1977]	Article in Journal	Australia	no	Australian Journal of Zoology Supplementary Series	agency	CSIRO
Apoidea	Hymenoptera	Brachyhesma	Brachyhesma	wyndhami		Valid	Species	Y	Exley	1968	Exley, E.M.	1	no	975	Exley, E.M. 1968. Revision of the genus Brachyhesma Michener (Apoidea: Colletidae). Australian Journal of Zoology 16: 167-201 [Date published 31/12/1968]	Article in Journal	Australia	no	Australian Journal of Zoology	agency	CSIRO
Apoidea	Hymenoptera	Brachyhesma	Henicohesma	deserticola		Valid	Species	Y	Exley	1968	Exley, E.M.	1	no	978	Exley, E.M. 1968. Three new species of Brachyhesma (Apoidea: Colletidae). Journal of the Australian Entomological Society 7: 135-141 [Date published 31/12/1968]	Article in Journal	Australia	yes	Journal of the Australian Entomological Society	society	AustEntSoc
Apoidea	Hymenoptera	Brachyhesma	Henicohesma	macdonaldensis		Valid	Species	Y	Exley	1968	Exley, E.M.	1	no	975	Exley, E.M. 1968. Revision of the genus Brachyhesma Michener (Apoidea: Colletidae). Australian Journal of Zoology 16: 167-201 [Date published 31/12/1968]	Article in Journal	Australia	no	Australian Journal of Zoology	agency	CSIRO
Apoidea	Hymenoptera	Brachyhesma	Microhesma	bitrichopedalis		Valid	Species	Y	Exley	1968	Exley, E.M.	1	no	975	Exley, E.M. 1968. Revision of the genus Brachyhesma Michener (Apoidea: Colletidae). Australian Journal of Zoology 16: 167-201 [Date published 31/12/1968]	Article in Journal	Australia	no	Australian Journal of Zoology	agency	CSIRO
Apoidea	Hymenoptera	Brachyhesma	Microhesma	cavagnari		Valid	Species	Y	Exley	1968	Exley, E.M.	1	no	975	Exley, E.M. 1968. Revision of the genus Brachyhesma Michener (Apoidea: Colletidae). Australian Journal of Zoology 16: 167-201 [Date published 31/12/1968]	Article in Journal	Australia	no	Australian Journal of Zoology	agency	CSIRO
Apoidea	Hymenoptera	Brachyhesma	Microhesma	cooki		Valid	Species	Y	Michener	1965	Michener, C.D.	1	no	2014	Michener, C.D. 1965. A classification of the bees of the Australian and South Pacific regions. Bulletin of the American Museum of Natural History 130: 1-362 [Date published 31/12/1965]	Article in Journal	USA	no	Bulletin of the American Museum of Natural History	na	na
Apoidea	Hymenoptera	Brachyhesma	Microhesma	dichaeta		Synonym of Brachyhesma (Brachyhesma) hypoxantha Michener, 1965	Species	Y	Michener	1965	Michener, C.D.	1	no	2014	Michener, C.D. 1965. A classification of the bees of the Australian and South Pacific regions. Bulletin of the American Museum of Natural History 130: 1-362 [Date published 31/12/1965]	Article in Journal	USA	no	Bulletin of the American Museum of Natural History	na	na
Apoidea	Hymenoptera	Brachyhesma	Microhesma	healesvillensis		Valid	Species	Y	Exley	1968	Exley, E.M.	1	no	975	Exley, E.M. 1968. Revision of the genus Brachyhesma Michener (Apoidea: Colletidae). Australian Journal of Zoology 16: 167-201 [Date published 31/12/1968]	Article in Journal	Australia	no	Australian Journal of Zoology	agency	CSIRO
Apoidea	Hymenoptera	Brachyhesma	Microhesma	incompleta		Valid	Species	Y	Michener	1965	Michener, C.D.	1	no	2014	Michener, C.D. 1965. A classification of the bees of the Australian and South Pacific regions. Bulletin of the American Museum of Natural History 130: 1-362 [Date published 31/12/1965]	Article in Journal	USA	no	Bulletin of the American Museum of Natural History	na	na
Apoidea	Hymenoptera	Brachyhesma	Microhesma	josephinae		Valid	Species	Y	Exley	1968	Exley, E.M.	1	no	975	Exley, E.M. 1968. Revision of the genus Brachyhesma Michener (Apoidea: Colletidae). Australian Journal of Zoology 16: 167-201 [Date published 31/12/1968]	Article in Journal	Australia	no	Australian Journal of Zoology	agency	CSIRO
Apoidea	Hymenoptera	Brachyhesma	Microhesma	katherinensis		Valid	Species	Y	Exley	1974	Exley, E.M.	1	no	987	Exley, E.M. 1974. A contribution to our knowledge of the bee fauna (Colletidae: Euryglossinae) of remote areas of Australia with descriptions of new species. Proceedings of the Royal Society of Queensland 85: 95-110 [Date published 31/12/1974]	Article in Journal	Australia	no	Proceedings of the Royal Society of Queensland	society	RoySocQld
Apoidea	Hymenoptera	Brachyhesma	Microhesma	minya		Valid	Species	Y	Exley	1975	Exley, E.M.	1	no	989	Exley, E.M. 1975. New species and records of Brachyhesma Michener (Apoidea: Colletidae: Euryglossinae). Journal of the Australian Entomological Society 14: 139-144 [Date published 31/12/1975]	Article in Journal	Australia	yes	Journal of the Australian Entomological Society	society	AustEntSoc
Apoidea	Hymenoptera	Brachyhesma	Microhesma	nabarleki		Valid	Species	Y	Exley	1977	Exley, E.M.	1	no	994	Exley, E.M. 1977. The Australian genus Brachyhesma (Apoidea: Colletidae) revised and reviewed. Australian Journal of Zoology Supplementary Series 53: 1-54 [Date published 31/12/1977]	Article in Journal	Australia	no	Australian Journal of Zoology Supplementary Series	agency	CSIRO
Apoidea	Hymenoptera	Brachyhesma	Microhesma	newmanensis		Valid	Species	Y	Exley	1977	Exley, E.M.	1	no	994	Exley, E.M. 1977. The Australian genus Brachyhesma (Apoidea: Colletidae) revised and reviewed. Australian Journal of Zoology Supplementary Series 53: 1-54 [Date published 31/12/1977]	Article in Journal	Australia	no	Australian Journal of Zoology Supplementary Series	agency	CSIRO
Apoidea	Hymenoptera	Brachyhesma	Microhesma	paucivenata		Valid	Species	Y	Exley	1977	Exley, E.M.	1	no	994	Exley, E.M. 1977. The Australian genus Brachyhesma (Apoidea: Colletidae) revised and reviewed. Australian Journal of Zoology Supplementary Series 53: 1-54 [Date published 31/12/1977]	Article in Journal	Australia	no	Australian Journal of Zoology Supplementary Series	agency	CSIRO
Apoidea	Hymenoptera	Brachyhesma	Microhesma	rossi		Valid	Species	Y	Exley	1968	Exley, E.M.	1	no	975	Exley, E.M. 1968. Revision of the genus Brachyhesma Michener (Apoidea: Colletidae). Australian Journal of Zoology 16: 167-201 [Date published 31/12/1968]	Article in Journal	Australia	no	Australian Journal of Zoology	agency	CSIRO
Apoidea	Hymenoptera	Brachyhesma	Microhesma	storeyi		Valid	Species	Y	Exley	1977	Exley, E.M.	1	no	994	Exley, E.M. 1977. The Australian genus Brachyhesma (Apoidea: Colletidae) revised and reviewed. Australian Journal of Zoology Supplementary Series 53: 1-54 [Date published 31/12/1977]	Article in Journal	Australia	no	Australian Journal of Zoology Supplementary Series	agency	CSIRO
Apoidea	Hymenoptera	Brachyhesma	Microhesma	trichopterota		Valid	Species	Y	Exley	1968	Exley, E.M.	1	no	978	Exley, E.M. 1968. Three new species of Brachyhesma (Apoidea: Colletidae). Journal of the Australian Entomological Society 7: 135-141 [Date published 31/12/1968]	Article in Journal	Australia	yes	Journal of the Australian Entomological Society	society	AustEntSoc
Apoidea	Hymenoptera	Brachyhesma	Microhesma	ventralis		Valid	Species	Y	Exley	1977	Exley, E.M.	1	no	994	Exley, E.M. 1977. The Australian genus Brachyhesma (Apoidea: Colletidae) revised and reviewed. Australian Journal of Zoology Supplementary Series 53: 1-54 [Date published 31/12/1977]	Article in Journal	Australia	no	Australian Journal of Zoology Supplementary Series	agency	CSIRO
Apoidea	Hymenoptera	Braunsapis		anthracina		Valid	Species	Y	Reyes	1993	Reyes, S.G.	1	no	2567	Reyes, S.G. 1993. Revision of the bee genus Braunsapis in the Australian region (Hymenoptera: Xylocopinae: Allodapini). University of Kansas Science Bulletin 55(3): 97-121 [Date published August]	Article in Journal	USA	no	University of Kansas Science Bulletin	na	na
Apoidea	Hymenoptera	Braunsapis		associata		Valid	Species	N	Michener	1961	Michener, C.D.	1	no	2011	Michener, C.D. 1961. Probable parasitism among Australian bees of the genus Allodapula (Hymenoptera, Apoidea, Ceratinini). Annals of the Entomological Society of America 54: 532-534 [Date published 31/12/1961]	Article in Journal	USA	yes	Annals of the Entomological Society of America	na	na
Apoidea	Hymenoptera	Braunsapis		diminutoides		Valid	Species	Y	Reyes	1993	Reyes, S.G.	1	no	2567	Reyes, S.G. 1993. Revision of the bee genus Braunsapis in the Australian region (Hymenoptera: Xylocopinae: Allodapini). University of Kansas Science Bulletin 55(3): 97-121 [Date published August]	Article in Journal	USA	no	University of Kansas Science Bulletin	na	na
Apoidea	Hymenoptera	Braunsapis		dolichocephala		Valid	Species	Y	Reyes	1993	Reyes, S.G.	1	no	2567	Reyes, S.G. 1993. Revision of the bee genus Braunsapis in the Australian region (Hymenoptera: Xylocopinae: Allodapini). University of Kansas Science Bulletin 55(3): 97-121 [Date published August]	Article in Journal	USA	no	University of Kansas Science Bulletin	na	na
Apoidea	Hymenoptera	Braunsapis		eximia		Valid	Species	Y	Reyes	1993	Reyes, S.G.	1	no	2567	Reyes, S.G. 1993. Revision of the bee genus Braunsapis in the Australian region (Hymenoptera: Xylocopinae: Allodapini). University of Kansas Science Bulletin 55(3): 97-121 [Date published August]	Article in Journal	USA	no	University of Kansas Science Bulletin	na	na
Apoidea	Hymenoptera	Braunsapis		falcata		Valid	Species	Y	Reyes	1993	Reyes, S.G.	1	no	2567	Reyes, S.G. 1993. Revision of the bee genus Braunsapis in the Australian region (Hymenoptera: Xylocopinae: Allodapini). University of Kansas Science Bulletin 55(3): 97-121 [Date published August]	Article in Journal	USA	no	University of Kansas Science Bulletin	na	na
Apoidea	Hymenoptera	Braunsapis		hirsuta		Valid	Species	Y	Reyes	1993	Reyes, S.G.	1	no	2567	Reyes, S.G. 1993. Revision of the bee genus Braunsapis in the Australian region (Hymenoptera: Xylocopinae: Allodapini). University of Kansas Science Bulletin 55(3): 97-121 [Date published August]	Article in Journal	USA	no	University of Kansas Science Bulletin	na	na
Apoidea	Hymenoptera	Braunsapis		hyalina		Valid	Species	Y	Reyes	1993	Reyes, S.G.	1	no	2567	Reyes, S.G. 1993. Revision of the bee genus Braunsapis in the Australian region (Hymenoptera: Xylocopinae: Allodapini). University of Kansas Science Bulletin 55(3): 97-121 [Date published August]	Article in Journal	USA	no	University of Kansas Science Bulletin	na	na
Apoidea	Hymenoptera	Braunsapis		minor		Valid	Species	N	Michener & Syed	1962	Michener, C.D. & Syed, I.H.	2	no	2016	Michener, C.D. & Syed, I.H. 1962. Specific characters of the larvae and adults of Allodapula in the Australian region (Hymenoptera: Ceratinini). Journal of the Entomological Society of Queensland 1: 30-41 [Date published 31/12/1962]	Article in Journal	Australia	yes	Journal of the Entomological Society of Queensland	society	EntSocQld
Apoidea	Hymenoptera	Braunsapis		occidentalis		Valid	Species	N	Michener & Syed	1962	Michener, C.D. & Syed, I.H.	2	no	2016	Michener, C.D. & Syed, I.H. 1962. Specific characters of the larvae and adults of Allodapula in the Australian region (Hymenoptera: Ceratinini). Journal of the Entomological Society of Queensland 1: 30-41 [Date published 31/12/1962]	Article in Journal	Australia	yes	Journal of the Entomological Society of Queensland	society	EntSocQld
Apoidea	Hymenoptera	Braunsapis		platyura		Valid	Species	Y	Reyes	1993	Reyes, S.G.	1	no	2567	Reyes, S.G. 1993. Revision of the bee genus Braunsapis in the Australian region (Hymenoptera: Xylocopinae: Allodapini). University of Kansas Science Bulletin 55(3): 97-121 [Date published August]	Article in Journal	USA	no	University of Kansas Science Bulletin	na	na
Apoidea	Hymenoptera	Braunsapis		plumosa		Valid	Species	Y	Reyes	1993	Reyes, S.G.	1	no	2567	Reyes, S.G. 1993. Revision of the bee genus Braunsapis in the Australian region (Hymenoptera: Xylocopinae: Allodapini). University of Kansas Science Bulletin 55(3): 97-121 [Date published August]	Article in Journal	USA	no	University of Kansas Science Bulletin	na	na
Apoidea	Hymenoptera	Braunsapis		praesumptiosa		Valid	Species	N	Michener	1961	Michener, C.D.	1	no	2011	Michener, C.D. 1961. Probable parasitism among Australian bees of the genus Allodapula (Hymenoptera, Apoidea, Ceratinini). Annals of the Entomological Society of America 54: 532-534 [Date published 31/12/1961]	Article in Journal	USA	yes	Annals of the Entomological Society of America	na	na
Apoidea	Hymenoptera	Braunsapis		protuberans		Valid	Species	Y	Reyes	1993	Reyes, S.G.	1	no	2567	Reyes, S.G. 1993. Revision of the bee genus Braunsapis in the Australian region (Hymenoptera: Xylocopinae: Allodapini). University of Kansas Science Bulletin 55(3): 97-121 [Date published August]	Article in Journal	USA	no	University of Kansas Science Bulletin	na	na
Apoidea	Hymenoptera	Braunsapis		verticalis		Valid	Species	Y	Reyes	1993	Reyes, S.G.	1	no	2567	Reyes, S.G. 1993. Revision of the bee genus Braunsapis in the Australian region (Hymenoptera: Xylocopinae: Allodapini). University of Kansas Science Bulletin 55(3): 97-121 [Date published August]	Article in Journal	USA	no	University of Kansas Science Bulletin	na	na
Apoidea	Hymenoptera	Callohesma		albiceris		Valid	Species	N	Exley	1974	Exley, E.M.	1	no	988	Exley, E.M. 1974. Revision of the subgenus Callohesma Michener (Apoidea: Colletidae). Australian Journal of Zoology Supplementary Series 26: 1-58 [Date published 31/12/1974]	Article in Journal	Australia	no	Australian Journal of Zoology Supplementary Series	agency	CSIRO
Apoidea	Hymenoptera	Callohesma		chlora		Valid	Species	N	Exley	1974	Exley, E.M.	1	no	988	Exley, E.M. 1974. Revision of the subgenus Callohesma Michener (Apoidea: Colletidae). Australian Journal of Zoology Supplementary Series 26: 1-58 [Date published 31/12/1974]	Article in Journal	Australia	no	Australian Journal of Zoology Supplementary Series	agency	CSIRO
Apoidea	Hymenoptera	Callohesma		coolgardensis		Valid	Species	N	Exley	1974	Exley, E.M.	1	no	988	Exley, E.M. 1974. Revision of the subgenus Callohesma Michener (Apoidea: Colletidae). Australian Journal of Zoology Supplementary Series 26: 1-58 [Date published 31/12/1974]	Article in Journal	Australia	no	Australian Journal of Zoology Supplementary Series	agency	CSIRO
Apoidea	Hymenoptera	Callohesma		eustonensis		Valid	Species	N	Exley	1974	Exley, E.M.	1	no	988	Exley, E.M. 1974. Revision of the subgenus Callohesma Michener (Apoidea: Colletidae). Australian Journal of Zoology Supplementary Series 26: 1-58 [Date published 31/12/1974]	Article in Journal	Australia	no	Australian Journal of Zoology Supplementary Series	agency	CSIRO
Apoidea	Hymenoptera	Callohesma		flava		Valid	Species	N	Exley	1974	Exley, E.M.	1	no	988	Exley, E.M. 1974. Revision of the subgenus Callohesma Michener (Apoidea: Colletidae). Australian Journal of Zoology Supplementary Series 26: 1-58 [Date published 31/12/1974]	Article in Journal	Australia	no	Australian Journal of Zoology Supplementary Series	agency	CSIRO
Apoidea	Hymenoptera	Callohesma		karratha		Valid	Species	N	Exley	1974	Exley, E.M.	1	no	988	Exley, E.M. 1974. Revision of the subgenus Callohesma Michener (Apoidea: Colletidae). Australian Journal of Zoology Supplementary Series 26: 1-58 [Date published 31/12/1974]	Article in Journal	Australia	no	Australian Journal of Zoology Supplementary Series	agency	CSIRO
Apoidea	Hymenoptera	Callohesma		lacteipennis		Valid	Species	N	Michener	1965	Michener, C.D.	1	no	2014	Michener, C.D. 1965. A classification of the bees of the Australian and South Pacific regions. Bulletin of the American Museum of Natural History 130: 1-362 [Date published 31/12/1965]	Article in Journal	USA	no	Bulletin of the American Museum of Natural History	na	na
Apoidea	Hymenoptera	Callohesma		lucida		Valid	Species	N	Exley	1974	Exley, E.M.	1	no	988	Exley, E.M. 1974. Revision of the subgenus Callohesma Michener (Apoidea: Colletidae). Australian Journal of Zoology Supplementary Series 26: 1-58 [Date published 31/12/1974]	Article in Journal	Australia	no	Australian Journal of Zoology Supplementary Series	agency	CSIRO
Apoidea	Hymenoptera	Callohesma		matthewsi		Valid	Species	N	Exley	1974	Exley, E.M.	1	no	988	Exley, E.M. 1974. Revision of the subgenus Callohesma Michener (Apoidea: Colletidae). Australian Journal of Zoology Supplementary Series 26: 1-58 [Date published 31/12/1974]	Article in Journal	Australia	no	Australian Journal of Zoology Supplementary Series	agency	CSIRO
Apoidea	Hymenoptera	Callohesma		megachlora		Valid	Species	N	Exley	1974	Exley, E.M.	1	no	988	Exley, E.M. 1974. Revision of the subgenus Callohesma Michener (Apoidea: Colletidae). Australian Journal of Zoology Supplementary Series 26: 1-58 [Date published 31/12/1974]	Article in Journal	Australia	no	Australian Journal of Zoology Supplementary Series	agency	CSIRO
Apoidea	Hymenoptera	Callohesma		nigripicta		Valid	Species	N	Exley	1974	Exley, E.M.	1	no	988	Exley, E.M. 1974. Revision of the subgenus Callohesma Michener (Apoidea: Colletidae). Australian Journal of Zoology Supplementary Series 26: 1-58 [Date published 31/12/1974]	Article in Journal	Australia	no	Australian Journal of Zoology Supplementary Series	agency	CSIRO
Apoidea	Hymenoptera	Callohesma		occidentalis		Valid	Species	N	Exley	1974	Exley, E.M.	1	no	988	Exley, E.M. 1974. Revision of the subgenus Callohesma Michener (Apoidea: Colletidae). Australian Journal of Zoology Supplementary Series 26: 1-58 [Date published 31/12/1974]	Article in Journal	Australia	no	Australian Journal of Zoology Supplementary Series	agency	CSIRO
Apoidea	Hymenoptera	Callohesma		pedalis		Valid	Species	N	Exley	1974	Exley, E.M.	1	no	988	Exley, E.M. 1974. Revision of the subgenus Callohesma Michener (Apoidea: Colletidae). Australian Journal of Zoology Supplementary Series 26: 1-58 [Date published 31/12/1974]	Article in Journal	Australia	no	Australian Journal of Zoology Supplementary Series	agency	CSIRO
Apoidea	Hymenoptera	Callohesma		queenslandensis		Valid	Species	N	Exley	1974	Exley, E.M.	1	no	988	Exley, E.M. 1974. Revision of the subgenus Callohesma Michener (Apoidea: Colletidae). Australian Journal of Zoology Supplementary Series 26: 1-58 [Date published 31/12/1974]	Article in Journal	Australia	no	Australian Journal of Zoology Supplementary Series	agency	CSIRO
Apoidea	Hymenoptera	Callohesma		recta		Valid	Species	N	Exley	1974	Exley, E.M.	1	no	988	Exley, E.M. 1974. Revision of the subgenus Callohesma Michener (Apoidea: Colletidae). Australian Journal of Zoology Supplementary Series 26: 1-58 [Date published 31/12/1974]	Article in Journal	Australia	no	Australian Journal of Zoology Supplementary Series	agency	CSIRO
Apoidea	Hymenoptera	Callohesma		rieki		Valid	Species	N	Exley	1974	Exley, E.M.	1	no	988	Exley, E.M. 1974. Revision of the subgenus Callohesma Michener (Apoidea: Colletidae). Australian Journal of Zoology Supplementary Series 26: 1-58 [Date published 31/12/1974]	Article in Journal	Australia	no	Australian Journal of Zoology Supplementary Series	agency	CSIRO
Apoidea	Hymenoptera	Callohesma		setula		Valid	Species	N	Exley	1974	Exley, E.M.	1	no	988	Exley, E.M. 1974. Revision of the subgenus Callohesma Michener (Apoidea: Colletidae). Australian Journal of Zoology Supplementary Series 26: 1-58 [Date published 31/12/1974]	Article in Journal	Australia	no	Australian Journal of Zoology Supplementary Series	agency	CSIRO
Apoidea	Hymenoptera	Callohesma		skermani		Valid	Species	N	Exley	1974	Exley, E.M.	1	no	988	Exley, E.M. 1974. Revision of the subgenus Callohesma Michener (Apoidea: Colletidae). Australian Journal of Zoology Supplementary Series 26: 1-58 [Date published 31/12/1974]	Article in Journal	Australia	no	Australian Journal of Zoology Supplementary Series	agency	CSIRO
Apoidea	Hymenoptera	Callohesma		splendens		Valid	Species	N	Exley	1974	Exley, E.M.	1	no	988	Exley, E.M. 1974. Revision of the subgenus Callohesma Michener (Apoidea: Colletidae). Australian Journal of Zoology Supplementary Series 26: 1-58 [Date published 31/12/1974]	Article in Journal	Australia	no	Australian Journal of Zoology Supplementary Series	agency	CSIRO
Apoidea	Hymenoptera	Callohesma		sulphurea		Valid	Species	N	Michener	1965	Michener, C.D.	1	no	2014	Michener, C.D. 1965. A classification of the bees of the Australian and South Pacific regions. Bulletin of the American Museum of Natural History 130: 1-362 [Date published 31/12/1965]	Article in Journal	USA	no	Bulletin of the American Museum of Natural History	na	na
Apoidea	Hymenoptera	Callohesma		townsvillensis		Valid	Species	N	Exley	1974	Exley, E.M.	1	no	988	Exley, E.M. 1974. Revision of the subgenus Callohesma Michener (Apoidea: Colletidae). Australian Journal of Zoology Supplementary Series 26: 1-58 [Date published 31/12/1974]	Article in Journal	Australia	no	Australian Journal of Zoology Supplementary Series	agency	CSIRO
Apoidea	Hymenoptera	Ceratostigmus		tasmanicus		Valid	Species	Y	Melo & Naumann	1999	Melo, G.A.R. & Naumann, I.	2	no	1994	Melo, G.A.R. & Naumann, I. 1999. Two new genera of Pemphredonine wasps from Australia (Hymenoptera: Apoidea, Crabronidae). University of Kansas Museum of Natural History Special Publications 24: 221-229	Article in Journal	USA	no	University of Kansas Museum of Natural History Special Publications	na	na
Apoidea	Hymenoptera	Cerceris		anthicivora		Valid	Species	Y	Evans	1982	Evans, H.E.	1	no	947	Evans, H.E. 1982. The genus Cerceris in eastern Australia (Hymenoptera: Sphecidae). Transactions of the American Entomological Society 107: 299-380	Article in Journal	USA	yes	Transactions of the American Entomological Society	na	na
Apoidea	Hymenoptera	Cerceris		balteata		Valid	Species	Y	Evans	1982	Evans, H.E.	1	no	947	Evans, H.E. 1982. The genus Cerceris in eastern Australia (Hymenoptera: Sphecidae). Transactions of the American Entomological Society 107: 299-380	Article in Journal	USA	yes	Transactions of the American Entomological Society	na	na
Apoidea	Hymenoptera	Cerceris		cunnamulla		Valid	Species	Y	Evans	1982	Evans, H.E.	1	no	947	Evans, H.E. 1982. The genus Cerceris in eastern Australia (Hymenoptera: Sphecidae). Transactions of the American Entomological Society 107: 299-380	Article in Journal	USA	yes	Transactions of the American Entomological Society	na	na
Apoidea	Hymenoptera	Cerceris		eungella		Valid	Species	Y	Evans	1982	Evans, H.E.	1	no	947	Evans, H.E. 1982. The genus Cerceris in eastern Australia (Hymenoptera: Sphecidae). Transactions of the American Entomological Society 107: 299-380	Article in Journal	USA	yes	Transactions of the American Entomological Society	na	na
Apoidea	Hymenoptera	Cerceris		exleyae		Valid	Species	Y	Evans	1982	Evans, H.E.	1	no	947	Evans, H.E. 1982. The genus Cerceris in eastern Australia (Hymenoptera: Sphecidae). Transactions of the American Entomological Society 107: 299-380	Article in Journal	USA	yes	Transactions of the American Entomological Society	na	na
Apoidea	Hymenoptera	Cerceris		forficata		Valid	Species	Y	Evans	1982	Evans, H.E.	1	no	947	Evans, H.E. 1982. The genus Cerceris in eastern Australia (Hymenoptera: Sphecidae). Transactions of the American Entomological Society 107: 299-380	Article in Journal	USA	yes	Transactions of the American Entomological Society	na	na
Apoidea	Hymenoptera	Cerceris		insulicola		Synonym of Cerceris goddardi Cockerell, 1930	Species	Y	Tsuneki	1968	Tsuneki, K.	1	no	3121	Tsuneki, K. 1968. On some Cerceris from Australia, with a tentative key to the Australian species (Hymenoptera, Sphecidae). Etizenia 28: 1-32	Article in Journal	Japan	no	Etizenia	na	na
Apoidea	Hymenoptera	Cerceris		iridis		Valid	Species	Y	Evans	1982	Evans, H.E.	1	no	947	Evans, H.E. 1982. The genus Cerceris in eastern Australia (Hymenoptera: Sphecidae). Transactions of the American Entomological Society 107: 299-380	Article in Journal	USA	yes	Transactions of the American Entomological Society	na	na
Apoidea	Hymenoptera	Cerceris		koala		Synonym of Cerceris praedura Turner, 1908	Species	Y	Tsuneki	1968	Tsuneki, K.	1	no	3121	Tsuneki, K. 1968. On some Cerceris from Australia, with a tentative key to the Australian species (Hymenoptera, Sphecidae). Etizenia 28: 1-32	Article in Journal	Japan	no	Etizenia	na	na
Apoidea	Hymenoptera	Cerceris		latiberbis		Valid	Species	Y	Tsuneki	1968	Tsuneki, K.	1	no	3121	Tsuneki, K. 1968. On some Cerceris from Australia, with a tentative key to the Australian species (Hymenoptera, Sphecidae). Etizenia 28: 1-32	Article in Journal	Japan	no	Etizenia	na	na
Apoidea	Hymenoptera	Cerceris		listrognatha		Valid	Species	Y	Evans	1982	Evans, H.E.	1	no	947	Evans, H.E. 1982. The genus Cerceris in eastern Australia (Hymenoptera: Sphecidae). Transactions of the American Entomological Society 107: 299-380	Article in Journal	USA	yes	Transactions of the American Entomological Society	na	na
Apoidea	Hymenoptera	Cerceris		luculenta		Valid	Species	Y	Evans	1982	Evans, H.E.	1	no	947	Evans, H.E. 1982. The genus Cerceris in eastern Australia (Hymenoptera: Sphecidae). Transactions of the American Entomological Society 107: 299-380	Article in Journal	USA	yes	Transactions of the American Entomological Society	na	na
Apoidea	Hymenoptera	Cerceris		megacantha		Valid	Species	Y	Evans	1982	Evans, H.E.	1	no	947	Evans, H.E. 1982. The genus Cerceris in eastern Australia (Hymenoptera: Sphecidae). Transactions of the American Entomological Society 107: 299-380	Article in Journal	USA	yes	Transactions of the American Entomological Society	na	na
Apoidea	Hymenoptera	Cerceris		osculata		Valid	Species	Y	Evans	1982	Evans, H.E.	1	no	947	Evans, H.E. 1982. The genus Cerceris in eastern Australia (Hymenoptera: Sphecidae). Transactions of the American Entomological Society 107: 299-380	Article in Journal	USA	yes	Transactions of the American Entomological Society	na	na
Apoidea	Hymenoptera	Cerceris		ropalidioides		Valid	Species	Y	Evans	1982	Evans, H.E.	1	no	947	Evans, H.E. 1982. The genus Cerceris in eastern Australia (Hymenoptera: Sphecidae). Transactions of the American Entomological Society 107: 299-380	Article in Journal	USA	yes	Transactions of the American Entomological Society	na	na
Apoidea	Hymenoptera	Cerceris		sculleni		Synonym of Cerceris antipodes Smith, 1856	Species	Y	Tsuneki	1968	Tsuneki, K.	1	no	3121	Tsuneki, K. 1968. On some Cerceris from Australia, with a tentative key to the Australian species (Hymenoptera, Sphecidae). Etizenia 28: 1-32	Article in Journal	Japan	no	Etizenia	na	na
Apoidea	Hymenoptera	Cerceris		sedula		Valid	Species	Y	Evans	1982	Evans, H.E.	1	no	947	Evans, H.E. 1982. The genus Cerceris in eastern Australia (Hymenoptera: Sphecidae). Transactions of the American Entomological Society 107: 299-380	Article in Journal	USA	yes	Transactions of the American Entomological Society	na	na
Apoidea	Hymenoptera	Cerceris		siccata		Valid	Species	Y	Evans	1982	Evans, H.E.	1	no	947	Evans, H.E. 1982. The genus Cerceris in eastern Australia (Hymenoptera: Sphecidae). Transactions of the American Entomological Society 107: 299-380	Article in Journal	USA	yes	Transactions of the American Entomological Society	na	na
Apoidea	Hymenoptera	Cerceris		spilota		Valid	Species	Y	Evans	1982	Evans, H.E.	1	no	947	Evans, H.E. 1982. The genus Cerceris in eastern Australia (Hymenoptera: Sphecidae). Transactions of the American Entomological Society 107: 299-380	Article in Journal	USA	yes	Transactions of the American Entomological Society	na	na
Apoidea	Hymenoptera	Cerceris		storeyi		Valid	Species	Y	Evans	1988	Evans, H.E.	1	no	950	Evans, H.E. 1988. Further studies on the systematics and nesting behavior of eastern Australian Cerceris wasps (Hymenoptera: Sphecidae). Transactions of the American Entomological Society 114: 1-13	Article in Journal	USA	yes	Transactions of the American Entomological Society	na	na
Apoidea	Hymenoptera	Cerceris		trifida		Valid	Species	Y	Evans	1982	Evans, H.E.	1	no	947	Evans, H.E. 1982. The genus Cerceris in eastern Australia (Hymenoptera: Sphecidae). Transactions of the American Entomological Society 107: 299-380	Article in Journal	USA	yes	Transactions of the American Entomological Society	na	na
Apoidea	Hymenoptera	Cerceris		windorum		Valid	Species	Y	Tsuneki	1968	Tsuneki, K.	1	no	3121	Tsuneki, K. 1968. On some Cerceris from Australia, with a tentative key to the Australian species (Hymenoptera, Sphecidae). Etizenia 28: 1-32	Article in Journal	Japan	no	Etizenia	na	na
Apoidea	Hymenoptera	Cerceris		xanthura		Valid	Species	Y	Evans	1982	Evans, H.E.	1	no	947	Evans, H.E. 1982. The genus Cerceris in eastern Australia (Hymenoptera: Sphecidae). Transactions of the American Entomological Society 107: 299-380	Article in Journal	USA	yes	Transactions of the American Entomological Society	na	na
Apoidea	Hymenoptera	Chrysocolletes		enigma		Valid	Species	Y	Maynard	1996	Maynard, G.	1	no	1919	Maynard, G. 1996. Revision of Chrysocolletes Michener stat. nov. (Hymenoptera: Colletidae), and descriptions of four new species. Australian Journal of Entomology 35(1): 1-8	Article in Journal	Australia	yes	Australian Journal of Entomology	society	AustEntSoc
Apoidea	Hymenoptera	Chrysocolletes		houstoni		Valid	Species	Y	Maynard	1996	Maynard, G.	1	no	1919	Maynard, G. 1996. Revision of Chrysocolletes Michener stat. nov. (Hymenoptera: Colletidae), and descriptions of four new species. Australian Journal of Entomology 35(1): 1-8	Article in Journal	Australia	yes	Australian Journal of Entomology	society	AustEntSoc
Apoidea	Hymenoptera	Chrysocolletes		pilosus		Valid	Species	Y	Maynard	1996	Maynard, G.	1	no	1919	Maynard, G. 1996. Revision of Chrysocolletes Michener stat. nov. (Hymenoptera: Colletidae), and descriptions of four new species. Australian Journal of Entomology 35(1): 1-8	Article in Journal	Australia	yes	Australian Journal of Entomology	society	AustEntSoc
Apoidea	Hymenoptera	Chrysocolletes		strangomeles		Valid	Species	Y	Maynard	1996	Maynard, G.	1	no	1919	Maynard, G. 1996. Revision of Chrysocolletes Michener stat. nov. (Hymenoptera: Colletidae), and descriptions of four new species. Australian Journal of Entomology 35(1): 1-8	Article in Journal	Australia	yes	Australian Journal of Entomology	society	AustEntSoc
Apoidea	Hymenoptera	Clitemnestra		menkei		Valid	Species	N	Pagliano	1995	Pagliano, G.	1	no	2325	Pagliano, G. 1995. Una nuova specie di Larrisson Menke dell'Australia (Hymenoptera: Sphecidae, Larrinae). Bollettino della Società Veneziana Storia Naturale 13: 385-388	Article in Journal	Italy	no	Bollettino della Società Veneziana Storia Naturale	na	na
Apoidea	Hymenoptera	Ctenocolletes		albomarginatus		Valid	Species	Y	Michener	1965	Michener, C.D.	1	no	2014	Michener, C.D. 1965. A classification of the bees of the Australian and South Pacific regions. Bulletin of the American Museum of Natural History 130: 1-362 [Date published 31/12/1965]	Article in Journal	USA	no	Bulletin of the American Museum of Natural History	na	na
Apoidea	Hymenoptera	Ctenocolletes		centralis		Valid	Species	Y	Houston	1983	Houston, T.F.	1	no	1339	Houston, T.F. 1983. A revision of the bee genus Ctenocolletes (Hymenoptera: Stenotritidae). Records of the Western Australian Museum 10: 269-306 [Date published 31/12/1983]	Article in Journal	Australia	no	Records of the Western Australian Museum	museum	WAMus
Apoidea	Hymenoptera	Ctenocolletes		fulvescens		Valid	Species	Y	Houston	1983	Houston, T.F.	1	no	1339	Houston, T.F. 1983. A revision of the bee genus Ctenocolletes (Hymenoptera: Stenotritidae). Records of the Western Australian Museum 10: 269-306 [Date published 31/12/1983]	Article in Journal	Australia	no	Records of the Western Australian Museum	museum	WAMus
Apoidea	Hymenoptera	Ctenocolletes		nigricans		Valid	Species	Y	Houston	1985	Houston, T.F.	1	no	1340	Houston, T.F. 1985. Supplement to a revision of the bee genus Ctenocolletes (Hymenoptera: Stenotritidae). Records of the Western Australian Museum 12: 293-305 [Date published 31/12/1985]	Article in Journal	Australia	no	Records of the Western Australian Museum	museum	WAMus
Apoidea	Hymenoptera	Ctenocolletes		notabilis		Synonym of Ctenocolletes nicholsoni (Cockerell, 1929)	Species	Y	Michener	1965	Michener, C.D.	1	no	2014	Michener, C.D. 1965. A classification of the bees of the Australian and South Pacific regions. Bulletin of the American Museum of Natural History 130: 1-362 [Date published 31/12/1965]	Article in Journal	USA	no	Bulletin of the American Museum of Natural History	na	na
Apoidea	Hymenoptera	Ctenocolletes		ordensis		Valid	Species	Y	Michener	1965	Michener, C.D.	1	no	2014	Michener, C.D. 1965. A classification of the bees of the Australian and South Pacific regions. Bulletin of the American Museum of Natural History 130: 1-362 [Date published 31/12/1965]	Article in Journal	USA	no	Bulletin of the American Museum of Natural History	na	na
Apoidea	Hymenoptera	Ctenocolletes		rufescens		Valid	Species	Y	Houston	1983	Houston, T.F.	1	no	1339	Houston, T.F. 1983. A revision of the bee genus Ctenocolletes (Hymenoptera: Stenotritidae). Records of the Western Australian Museum 10: 269-306 [Date published 31/12/1983]	Article in Journal	Australia	no	Records of the Western Australian Museum	museum	WAMus
Apoidea	Hymenoptera	Ctenocolletes		tigris		Valid	Species	Y	Houston	1983	Houston, T.F.	1	no	1337	Houston, T.F. 1983. A new species of Ctenocolletes (Hymenoptera: Stenotritidae). Records of the Western Australian Museum 10: 307-313 [Date published 31/12/1983]	Article in Journal	Australia	no	Records of the Western Australian Museum	museum	WAMus
Apoidea	Hymenoptera	Ctenocolletes		tricolor		Valid	Species	Y	Houston	1983	Houston, T.F.	1	no	1339	Houston, T.F. 1983. A revision of the bee genus Ctenocolletes (Hymenoptera: Stenotritidae). Records of the Western Australian Museum 10: 269-306 [Date published 31/12/1983]	Article in Journal	Australia	no	Records of the Western Australian Museum	museum	WAMus
Apoidea	Hymenoptera	Dasyhesma		albula		Valid	Species	Y	Exley	2004	Exley, E.M.	1	no	1006	Exley, E.M. 2004. Revision of the genus Dasyhesma Michener (Apoidea: Colletidae: Euryglossinae). Records of the Western Australian Museum 22: 129-146	Article in Journal	Australia	no	Records of the Western Australian Museum	museum	WAMus
Apoidea	Hymenoptera	Dasyhesma		areola		Valid	Species	Y	Exley	2004	Exley, E.M.	1	no	1006	Exley, E.M. 2004. Revision of the genus Dasyhesma Michener (Apoidea: Colletidae: Euryglossinae). Records of the Western Australian Museum 22: 129-146	Article in Journal	Australia	no	Records of the Western Australian Museum	museum	WAMus
Apoidea	Hymenoptera	Dasyhesma		argentea		Valid	Species	Y	Exley	2004	Exley, E.M.	1	no	1006	Exley, E.M. 2004. Revision of the genus Dasyhesma Michener (Apoidea: Colletidae: Euryglossinae). Records of the Western Australian Museum 22: 129-146	Article in Journal	Australia	no	Records of the Western Australian Museum	museum	WAMus
Apoidea	Hymenoptera	Dasyhesma		aurea		Valid	Species	Y	Exley	2004	Exley, E.M.	1	no	1006	Exley, E.M. 2004. Revision of the genus Dasyhesma Michener (Apoidea: Colletidae: Euryglossinae). Records of the Western Australian Museum 22: 129-146	Article in Journal	Australia	no	Records of the Western Australian Museum	museum	WAMus
Apoidea	Hymenoptera	Dasyhesma		baeckea		Valid	Species	Y	Exley	2004	Exley, E.M.	1	no	1006	Exley, E.M. 2004. Revision of the genus Dasyhesma Michener (Apoidea: Colletidae: Euryglossinae). Records of the Western Australian Museum 22: 129-146	Article in Journal	Australia	no	Records of the Western Australian Museum	museum	WAMus
Apoidea	Hymenoptera	Dasyhesma		boharti		Valid	Species	Y	Exley	2004	Exley, E.M.	1	no	1006	Exley, E.M. 2004. Revision of the genus Dasyhesma Michener (Apoidea: Colletidae: Euryglossinae). Records of the Western Australian Museum 22: 129-146	Article in Journal	Australia	no	Records of the Western Australian Museum	museum	WAMus
Apoidea	Hymenoptera	Dasyhesma		brevipalpa		Valid	Species	Y	Exley	2004	Exley, E.M.	1	no	1006	Exley, E.M. 2004. Revision of the genus Dasyhesma Michener (Apoidea: Colletidae: Euryglossinae). Records of the Western Australian Museum 22: 129-146	Article in Journal	Australia	no	Records of the Western Australian Museum	museum	WAMus
Apoidea	Hymenoptera	Dasyhesma		clypeata		Valid	Species	Y	Exley	2004	Exley, E.M.	1	no	1006	Exley, E.M. 2004. Revision of the genus Dasyhesma Michener (Apoidea: Colletidae: Euryglossinae). Records of the Western Australian Museum 22: 129-146	Article in Journal	Australia	no	Records of the Western Australian Museum	museum	WAMus
Apoidea	Hymenoptera	Dasyhesma		coolgardensis		Valid	Species	Y	Exley	2004	Exley, E.M.	1	no	1006	Exley, E.M. 2004. Revision of the genus Dasyhesma Michener (Apoidea: Colletidae: Euryglossinae). Records of the Western Australian Museum 22: 129-146	Article in Journal	Australia	no	Records of the Western Australian Museum	museum	WAMus
Apoidea	Hymenoptera	Dasyhesma		depressa		Valid	Species	Y	Exley	2004	Exley, E.M.	1	no	1006	Exley, E.M. 2004. Revision of the genus Dasyhesma Michener (Apoidea: Colletidae: Euryglossinae). Records of the Western Australian Museum 22: 129-146	Article in Journal	Australia	no	Records of the Western Australian Museum	museum	WAMus
Apoidea	Hymenoptera	Dasyhesma		dilata		Valid	Species	Y	Exley	2004	Exley, E.M.	1	no	1006	Exley, E.M. 2004. Revision of the genus Dasyhesma Michener (Apoidea: Colletidae: Euryglossinae). Records of the Western Australian Museum 22: 129-146	Article in Journal	Australia	no	Records of the Western Australian Museum	museum	WAMus
Apoidea	Hymenoptera	Dasyhesma		forestii		Valid	Species	Y	Exley	2004	Exley, E.M.	1	no	1006	Exley, E.M. 2004. Revision of the genus Dasyhesma Michener (Apoidea: Colletidae: Euryglossinae). Records of the Western Australian Museum 22: 129-146	Article in Journal	Australia	no	Records of the Western Australian Museum	museum	WAMus
Apoidea	Hymenoptera	Dasyhesma		galbina		Valid	Species	Y	Exley	2004	Exley, E.M.	1	no	1006	Exley, E.M. 2004. Revision of the genus Dasyhesma Michener (Apoidea: Colletidae: Euryglossinae). Records of the Western Australian Museum 22: 129-146	Article in Journal	Australia	no	Records of the Western Australian Museum	museum	WAMus
Apoidea	Hymenoptera	Dasyhesma		lepidophyllae		Valid	Species	Y	Exley	2004	Exley, E.M.	1	no	1006	Exley, E.M. 2004. Revision of the genus Dasyhesma Michener (Apoidea: Colletidae: Euryglossinae). Records of the Western Australian Museum 22: 129-146	Article in Journal	Australia	no	Records of the Western Australian Museum	museum	WAMus
Apoidea	Hymenoptera	Dasyhesma		muelleriana		Valid	Species	Y	Exley	2004	Exley, E.M.	1	no	1006	Exley, E.M. 2004. Revision of the genus Dasyhesma Michener (Apoidea: Colletidae: Euryglossinae). Records of the Western Australian Museum 22: 129-146	Article in Journal	Australia	no	Records of the Western Australian Museum	museum	WAMus
Apoidea	Hymenoptera	Dasyhesma		robusta		Valid	Species	Y	Michener	1965	Michener, C.D.	1	no	2014	Michener, C.D. 1965. A classification of the bees of the Australian and South Pacific regions. Bulletin of the American Museum of Natural History 130: 1-362 [Date published 31/12/1965]	Article in Journal	USA	no	Bulletin of the American Museum of Natural History	na	na
Apoidea	Hymenoptera	Dasyhesma		scholtziae		Valid	Species	Y	Exley	2004	Exley, E.M.	1	no	1006	Exley, E.M. 2004. Revision of the genus Dasyhesma Michener (Apoidea: Colletidae: Euryglossinae). Records of the Western Australian Museum 22: 129-146	Article in Journal	Australia	no	Records of the Western Australian Museum	museum	WAMus
Apoidea	Hymenoptera	Dasyhesma		simulata		Valid	Species	Y	Exley	2004	Exley, E.M.	1	no	1006	Exley, E.M. 2004. Revision of the genus Dasyhesma Michener (Apoidea: Colletidae: Euryglossinae). Records of the Western Australian Museum 22: 129-146	Article in Journal	Australia	no	Records of the Western Australian Museum	museum	WAMus
Apoidea	Hymenoptera	Dasyhesma		spicata		Valid	Species	Y	Exley	2004	Exley, E.M.	1	no	1006	Exley, E.M. 2004. Revision of the genus Dasyhesma Michener (Apoidea: Colletidae: Euryglossinae). Records of the Western Australian Museum 22: 129-146	Article in Journal	Australia	no	Records of the Western Australian Museum	museum	WAMus
Apoidea	Hymenoptera	Dasyhesma		syntoma		Valid	Species	Y	Exley	2004	Exley, E.M.	1	no	1006	Exley, E.M. 2004. Revision of the genus Dasyhesma Michener (Apoidea: Colletidae: Euryglossinae). Records of the Western Australian Museum 22: 129-146	Article in Journal	Australia	no	Records of the Western Australian Museum	museum	WAMus
Apoidea	Hymenoptera	Dasyproctus		austragilis		Valid	Species	Y	Leclercq	1972	Leclercq, J.	1	no	1713	Leclercq, J. 1972. Crabroniens du genre Dasyproctus trouvés en Asie et en Océanie. Bulletin de la Société Royale des Sciences de Liège 41: 101-122	Article in Journal	Belgium	no	Bulletin de la Société Royale des Sciences de Liège	na	na
Apoidea	Hymenoptera	Dolichurus		astos		Valid	Species	Y	Ohl	2002	Ohl, M.	1	no	2278	Ohl, M. 2002. A revision of the wasp genus Dolichurus Latreille, 1809 in Australia (Hymenoptera: Apoidea: Ampulicidae). Insect Systematics and Evolution 33(1): 35-51	Article in Journal	Denmark	yes	Insect Systematics and Evolution	na	na
Apoidea	Hymenoptera	Dolichurus		crenatus		Valid	Species	Y	Ohl	2002	Ohl, M.	1	no	2278	Ohl, M. 2002. A revision of the wasp genus Dolichurus Latreille, 1809 in Australia (Hymenoptera: Apoidea: Ampulicidae). Insect Systematics and Evolution 33(1): 35-51	Article in Journal	Denmark	yes	Insect Systematics and Evolution	na	na
Apoidea	Hymenoptera	Dolichurus		yungaburra		Valid	Species	Y	Ohl	2002	Ohl, M.	1	no	2278	Ohl, M. 2002. A revision of the wasp genus Dolichurus Latreille, 1809 in Australia (Hymenoptera: Apoidea: Ampulicidae). Insect Systematics and Evolution 33(1): 35-51	Article in Journal	Denmark	yes	Insect Systematics and Evolution	na	na
Apoidea	Hymenoptera	Euhesma	Euhesma	acantha		Valid	Species	Y	Exley	2004	Exley, E.M.	1	no	1005	Exley, E.M. 2004. A new group of Euryglossine bees from Australia (Hymenoptera: Apoidea: Colletidae). Journal of the Kansas Entomological Society 77(4): 796-804	Article in Journal	USA	yes	Journal of the Kansas Entomological Society	na	na
Apoidea	Hymenoptera	Euhesma	Euhesma	alicia		Valid	Species	N	Exley	1998	Exley, E.M.	1	no	1002	Exley, E.M. 1998. New Euryglossa (Euhesma) bees (Hymenoptera: Colletidae: Euryglossinae) associated with the Australian plant genus Eremophila (Myoporaceae). Records of the Western Australian Museum 18: 419-437	Article in Journal	Australia	no	Records of the Western Australian Museum	museum	WAMus
Apoidea	Hymenoptera	Euhesma	Euhesma	allunga		Valid	Species	Y	Exley	2001	Exley, E.M.	1	no	1003	Exley, E.M. 2001. The walkeriana species-group of Euhesma Michener (Hymenoptera: Colletidae: Euryglossinae). Australian Journal of Entomology 40: 102-112	Article in Journal	Australia	yes	Australian Journal of Entomology	society	AustEntSoc
Apoidea	Hymenoptera	Euhesma	Euhesma	atra		Valid	Species	N	Exley	1998	Exley, E.M.	1	no	1002	Exley, E.M. 1998. New Euryglossa (Euhesma) bees (Hymenoptera: Colletidae: Euryglossinae) associated with the Australian plant genus Eremophila (Myoporaceae). Records of the Western Australian Museum 18: 419-437	Article in Journal	Australia	no	Records of the Western Australian Museum	museum	WAMus
Apoidea	Hymenoptera	Euhesma	Euhesma	aurata		Valid	Species	N	Exley	1998	Exley, E.M.	1	no	1002	Exley, E.M. 1998. New Euryglossa (Euhesma) bees (Hymenoptera: Colletidae: Euryglossinae) associated with the Australian plant genus Eremophila (Myoporaceae). Records of the Western Australian Museum 18: 419-437	Article in Journal	Australia	no	Records of the Western Australian Museum	museum	WAMus
Apoidea	Hymenoptera	Euhesma	Euhesma	aureophila		Valid	Species	N	Houston	1992	Houston, T.F.	1	no	1344	Houston, T.F. 1992. Three new, monolectic species of Euryglossa (Euhesma) from Western Australia (Hymenoptera: Colletidae). Records of the Western Australian Museum 15: 719-728 [Date published 31/12/1992]	Article in Journal	Australia	no	Records of the Western Australian Museum	museum	WAMus
Apoidea	Hymenoptera	Euhesma	Euhesma	australis		Valid	Species	N	Michener	1965	Michener, C.D.	1	no	2014	Michener, C.D. 1965. A classification of the bees of the Australian and South Pacific regions. Bulletin of the American Museum of Natural History 130: 1-362 [Date published 31/12/1965]	Article in Journal	USA	no	Bulletin of the American Museum of Natural History	na	na
Apoidea	Hymenoptera	Euhesma	Euhesma	balladonia		Valid	Species	N	Exley	1998	Exley, E.M.	1	no	1002	Exley, E.M. 1998. New Euryglossa (Euhesma) bees (Hymenoptera: Colletidae: Euryglossinae) associated with the Australian plant genus Eremophila (Myoporaceae). Records of the Western Australian Museum 18: 419-437	Article in Journal	Australia	no	Records of the Western Australian Museum	museum	WAMus
Apoidea	Hymenoptera	Euhesma	Euhesma	banksia		Valid	Species	Y	Exley	2001	Exley, E.M.	1	no	1003	Exley, E.M. 2001. The walkeriana species-group of Euhesma Michener (Hymenoptera: Colletidae: Euryglossinae). Australian Journal of Entomology 40: 102-112	Article in Journal	Australia	yes	Australian Journal of Entomology	society	AustEntSoc
Apoidea	Hymenoptera	Euhesma	Euhesma	bronzus		Valid	Species	Y	Exley	2001	Exley, E.M.	1	no	1003	Exley, E.M. 2001. The walkeriana species-group of Euhesma Michener (Hymenoptera: Colletidae: Euryglossinae). Australian Journal of Entomology 40: 102-112	Article in Journal	Australia	yes	Australian Journal of Entomology	society	AustEntSoc
Apoidea	Hymenoptera	Euhesma	Euhesma	collaris		Valid	Species	Y	Exley	2004	Exley, E.M.	1	no	1005	Exley, E.M. 2004. A new group of Euryglossine bees from Australia (Hymenoptera: Apoidea: Colletidae). Journal of the Kansas Entomological Society 77(4): 796-804	Article in Journal	USA	yes	Journal of the Kansas Entomological Society	na	na
Apoidea	Hymenoptera	Euhesma	Euhesma	coppinensis		Valid	Species	N	Exley	1998	Exley, E.M.	1	no	1002	Exley, E.M. 1998. New Euryglossa (Euhesma) bees (Hymenoptera: Colletidae: Euryglossinae) associated with the Australian plant genus Eremophila (Myoporaceae). Records of the Western Australian Museum 18: 419-437	Article in Journal	Australia	no	Records of the Western Australian Museum	museum	WAMus
Apoidea	Hymenoptera	Euhesma	Euhesma	cuneifolia		Valid	Species	N	Exley	1998	Exley, E.M.	1	no	1002	Exley, E.M. 1998. New Euryglossa (Euhesma) bees (Hymenoptera: Colletidae: Euryglossinae) associated with the Australian plant genus Eremophila (Myoporaceae). Records of the Western Australian Museum 18: 419-437	Article in Journal	Australia	no	Records of the Western Australian Museum	museum	WAMus
Apoidea	Hymenoptera	Euhesma	Euhesma	dongara		Valid	Species	Y	Exley	2001	Exley, E.M.	1	no	1003	Exley, E.M. 2001. The walkeriana species-group of Euhesma Michener (Hymenoptera: Colletidae: Euryglossinae). Australian Journal of Entomology 40: 102-112	Article in Journal	Australia	yes	Australian Journal of Entomology	society	AustEntSoc
Apoidea	Hymenoptera	Euhesma	Euhesma	evansi		Valid	Species	Y	Exley	2002	Exley, E.M.	1	no	1004	Exley, E.M. 2002. Bees of the Euhesma crabronica species-group (Hymenoptera: Colletidae: Euryglossinae). Records of the Western Australian Museum 21: 203-211	Article in Journal	Australia	no	Records of the Western Australian Museum	museum	WAMus
Apoidea	Hymenoptera	Euhesma	Euhesma	granitica		Valid	Species	N	Exley	1998	Exley, E.M.	1	no	1002	Exley, E.M. 1998. New Euryglossa (Euhesma) bees (Hymenoptera: Colletidae: Euryglossinae) associated with the Australian plant genus Eremophila (Myoporaceae). Records of the Western Australian Museum 18: 419-437	Article in Journal	Australia	no	Records of the Western Australian Museum	museum	WAMus
Apoidea	Hymenoptera	Euhesma	Euhesma	hyphesmoides		Valid	Species	N	Michener	1965	Michener, C.D.	1	no	2014	Michener, C.D. 1965. A classification of the bees of the Australian and South Pacific regions. Bulletin of the American Museum of Natural History 130: 1-362 [Date published 31/12/1965]	Article in Journal	USA	no	Bulletin of the American Museum of Natural History	na	na
Apoidea	Hymenoptera	Euhesma	Euhesma	leonora		Valid	Species	N	Exley	1998	Exley, E.M.	1	no	1002	Exley, E.M. 1998. New Euryglossa (Euhesma) bees (Hymenoptera: Colletidae: Euryglossinae) associated with the Australian plant genus Eremophila (Myoporaceae). Records of the Western Australian Museum 18: 419-437	Article in Journal	Australia	no	Records of the Western Australian Museum	museum	WAMus
Apoidea	Hymenoptera	Euhesma	Euhesma	lobata		Valid	Species	Y	Exley	2001	Exley, E.M.	1	no	1003	Exley, E.M. 2001. The walkeriana species-group of Euhesma Michener (Hymenoptera: Colletidae: Euryglossinae). Australian Journal of Entomology 40: 102-112	Article in Journal	Australia	yes	Australian Journal of Entomology	society	AustEntSoc
Apoidea	Hymenoptera	Euhesma	Euhesma	loorea		Valid	Species	Y	Exley	2004	Exley, E.M.	1	no	1005	Exley, E.M. 2004. A new group of Euryglossine bees from Australia (Hymenoptera: Apoidea: Colletidae). Journal of the Kansas Entomological Society 77(4): 796-804	Article in Journal	USA	yes	Journal of the Kansas Entomological Society	na	na
Apoidea	Hymenoptera	Euhesma	Euhesma	lucida		Valid	Species	Y	Exley	2002	Exley, E.M.	1	no	1004	Exley, E.M. 2002. Bees of the Euhesma crabronica species-group (Hymenoptera: Colletidae: Euryglossinae). Records of the Western Australian Museum 21: 203-211	Article in Journal	Australia	no	Records of the Western Australian Museum	museum	WAMus
Apoidea	Hymenoptera	Euhesma	Euhesma	macrayae		Valid	Species	N	Exley	1998	Exley, E.M.	1	no	1002	Exley, E.M. 1998. New Euryglossa (Euhesma) bees (Hymenoptera: Colletidae: Euryglossinae) associated with the Australian plant genus Eremophila (Myoporaceae). Records of the Western Australian Museum 18: 419-437	Article in Journal	Australia	no	Records of the Western Australian Museum	museum	WAMus
Apoidea	Hymenoptera	Euhesma	Euhesma	malaris		Valid	Species	N	Michener	1965	Michener, C.D.	1	no	2014	Michener, C.D. 1965. A classification of the bees of the Australian and South Pacific regions. Bulletin of the American Museum of Natural History 130: 1-362 [Date published 31/12/1965]	Article in Journal	USA	no	Bulletin of the American Museum of Natural History	na	na
Apoidea	Hymenoptera	Euhesma	Euhesma	meeka		Valid	Species	N	Exley	1998	Exley, E.M.	1	no	1002	Exley, E.M. 1998. New Euryglossa (Euhesma) bees (Hymenoptera: Colletidae: Euryglossinae) associated with the Australian plant genus Eremophila (Myoporaceae). Records of the Western Australian Museum 18: 419-437	Article in Journal	Australia	no	Records of the Western Australian Museum	museum	WAMus
Apoidea	Hymenoptera	Euhesma	Euhesma	morrisoni		Valid	Species	N	Houston	1992	Houston, T.F.	1	no	1344	Houston, T.F. 1992. Three new, monolectic species of Euryglossa (Euhesma) from Western Australia (Hymenoptera: Colletidae). Records of the Western Australian Museum 15: 719-728 [Date published 31/12/1992]	Article in Journal	Australia	no	Records of the Western Australian Museum	museum	WAMus
Apoidea	Hymenoptera	Euhesma	Euhesma	nalbarra		Valid	Species	N	Exley	1998	Exley, E.M.	1	no	1002	Exley, E.M. 1998. New Euryglossa (Euhesma) bees (Hymenoptera: Colletidae: Euryglossinae) associated with the Australian plant genus Eremophila (Myoporaceae). Records of the Western Australian Museum 18: 419-437	Article in Journal	Australia	no	Records of the Western Australian Museum	museum	WAMus
Apoidea	Hymenoptera	Euhesma	Euhesma	newmanensis		Valid	Species	N	Exley	1998	Exley, E.M.	1	no	1002	Exley, E.M. 1998. New Euryglossa (Euhesma) bees (Hymenoptera: Colletidae: Euryglossinae) associated with the Australian plant genus Eremophila (Myoporaceae). Records of the Western Australian Museum 18: 419-437	Article in Journal	Australia	no	Records of the Western Australian Museum	museum	WAMus
Apoidea	Hymenoptera	Euhesma	Euhesma	palpalis		Valid	Species	N	Michener	1965	Michener, C.D.	1	no	2014	Michener, C.D. 1965. A classification of the bees of the Australian and South Pacific regions. Bulletin of the American Museum of Natural History 130: 1-362 [Date published 31/12/1965]	Article in Journal	USA	no	Bulletin of the American Museum of Natural History	na	na
Apoidea	Hymenoptera	Euhesma	Euhesma	pantoni		Valid	Species	N	Exley	1998	Exley, E.M.	1	no	1002	Exley, E.M. 1998. New Euryglossa (Euhesma) bees (Hymenoptera: Colletidae: Euryglossinae) associated with the Australian plant genus Eremophila (Myoporaceae). Records of the Western Australian Museum 18: 419-437	Article in Journal	Australia	no	Records of the Western Australian Museum	museum	WAMus
Apoidea	Hymenoptera	Euhesma	Euhesma	perkinsi		Valid	Species	N	Michener	1965	Michener, C.D.	1	no	2014	Michener, C.D. 1965. A classification of the bees of the Australian and South Pacific regions. Bulletin of the American Museum of Natural History 130: 1-362 [Date published 31/12/1965]	Article in Journal	USA	no	Bulletin of the American Museum of Natural History	na	na
Apoidea	Hymenoptera	Euhesma	Euhesma	rufiventris		Valid	Species	N	Michener	1965	Michener, C.D.	1	no	2014	Michener, C.D. 1965. A classification of the bees of the Australian and South Pacific regions. Bulletin of the American Museum of Natural History 130: 1-362 [Date published 31/12/1965]	Article in Journal	USA	no	Bulletin of the American Museum of Natural History	na	na
Apoidea	Hymenoptera	Euhesma	Euhesma	scoparia		Valid	Species	N	Exley	1998	Exley, E.M.	1	no	1002	Exley, E.M. 1998. New Euryglossa (Euhesma) bees (Hymenoptera: Colletidae: Euryglossinae) associated with the Australian plant genus Eremophila (Myoporaceae). Records of the Western Australian Museum 18: 419-437	Article in Journal	Australia	no	Records of the Western Australian Museum	museum	WAMus
Apoidea	Hymenoptera	Euhesma	Euhesma	semaphore		Valid	Species	N	Houston	1992	Houston, T.F.	1	no	1344	Houston, T.F. 1992. Three new, monolectic species of Euryglossa (Euhesma) from Western Australia (Hymenoptera: Colletidae). Records of the Western Australian Museum 15: 719-728 [Date published 31/12/1992]	Article in Journal	Australia	no	Records of the Western Australian Museum	museum	WAMus
Apoidea	Hymenoptera	Euhesma	Euhesma	spinola		Valid	Species	Y	Exley	2001	Exley, E.M.	1	no	1003	Exley, E.M. 2001. The walkeriana species-group of Euhesma Michener (Hymenoptera: Colletidae: Euryglossinae). Australian Journal of Entomology 40: 102-112	Article in Journal	Australia	yes	Australian Journal of Entomology	society	AustEntSoc
Apoidea	Hymenoptera	Euhesma	Euhesma	sturtiensis		Valid	Species	N	Exley	1998	Exley, E.M.	1	no	1002	Exley, E.M. 1998. New Euryglossa (Euhesma) bees (Hymenoptera: Colletidae: Euryglossinae) associated with the Australian plant genus Eremophila (Myoporaceae). Records of the Western Australian Museum 18: 419-437	Article in Journal	Australia	no	Records of the Western Australian Museum	museum	WAMus
Apoidea	Hymenoptera	Euhesma	Euhesma	sulcata		Valid	Species	N	Exley	1998	Exley, E.M.	1	no	1002	Exley, E.M. 1998. New Euryglossa (Euhesma) bees (Hymenoptera: Colletidae: Euryglossinae) associated with the Australian plant genus Eremophila (Myoporaceae). Records of the Western Australian Museum 18: 419-437	Article in Journal	Australia	no	Records of the Western Australian Museum	museum	WAMus
Apoidea	Hymenoptera	Euhesma	Euhesma	sybilae		Valid	Species	Y	Exley	2001	Exley, E.M.	1	no	1003	Exley, E.M. 2001. The walkeriana species-group of Euhesma Michener (Hymenoptera: Colletidae: Euryglossinae). Australian Journal of Entomology 40: 102-112	Article in Journal	Australia	yes	Australian Journal of Entomology	society	AustEntSoc
Apoidea	Hymenoptera	Euhesma	Euhesma	symmetra		Valid	Species	N	Exley	1998	Exley, E.M.	1	no	1002	Exley, E.M. 1998. New Euryglossa (Euhesma) bees (Hymenoptera: Colletidae: Euryglossinae) associated with the Australian plant genus Eremophila (Myoporaceae). Records of the Western Australian Museum 18: 419-437	Article in Journal	Australia	no	Records of the Western Australian Museum	museum	WAMus
Apoidea	Hymenoptera	Euhesma	Euhesma	thala		Valid	Species	Y	Exley	2002	Exley, E.M.	1	no	1004	Exley, E.M. 2002. Bees of the Euhesma crabronica species-group (Hymenoptera: Colletidae: Euryglossinae). Records of the Western Australian Museum 21: 203-211	Article in Journal	Australia	no	Records of the Western Australian Museum	museum	WAMus
Apoidea	Hymenoptera	Euhesma	Euhesma	tubulifera		Valid	Species	N	Houston	1983	Houston, T.F.	1	no	1338	Houston, T.F. 1983. An extraordinary new bee and adaptation of palpi for nectar-feeding in some Australian Colletidae and Pergidae (Hymenoptera). Journal of the Australian Entomological Society 22: 263-270 [Date published 31/12/1983]	Article in Journal	Australia	yes	Journal of the Australian Entomological Society	society	AustEntSoc
Apoidea	Hymenoptera	Euhesma	Euhesma	undeneya		Valid	Species	Y	Exley	2002	Exley, E.M.	1	no	1004	Exley, E.M. 2002. Bees of the Euhesma crabronica species-group (Hymenoptera: Colletidae: Euryglossinae). Records of the Western Australian Museum 21: 203-211	Article in Journal	Australia	no	Records of the Western Australian Museum	museum	WAMus
Apoidea	Hymenoptera	Euhesma	Euhesma	viridescens		Valid	Species	Y	Exley	2001	Exley, E.M.	1	no	1003	Exley, E.M. 2001. The walkeriana species-group of Euhesma Michener (Hymenoptera: Colletidae: Euryglossinae). Australian Journal of Entomology 40: 102-112	Article in Journal	Australia	yes	Australian Journal of Entomology	society	AustEntSoc
Apoidea	Hymenoptera	Euhesma	Euhesma	wahlenbergiae		Valid	Species	N	Michener	1965	Michener, C.D.	1	no	2014	Michener, C.D. 1965. A classification of the bees of the Australian and South Pacific regions. Bulletin of the American Museum of Natural History 130: 1-362 [Date published 31/12/1965]	Article in Journal	USA	no	Bulletin of the American Museum of Natural History	na	na
Apoidea	Hymenoptera	Euhesma	Euhesma	walkeri		Valid	Species	N	Exley	1998	Exley, E.M.	1	no	1002	Exley, E.M. 1998. New Euryglossa (Euhesma) bees (Hymenoptera: Colletidae: Euryglossinae) associated with the Australian plant genus Eremophila (Myoporaceae). Records of the Western Australian Museum 18: 419-437	Article in Journal	Australia	no	Records of the Western Australian Museum	museum	WAMus
Apoidea	Hymenoptera	Euhesma	Euhesma	wiluna		Valid	Species	N	Exley	1998	Exley, E.M.	1	no	1002	Exley, E.M. 1998. New Euryglossa (Euhesma) bees (Hymenoptera: Colletidae: Euryglossinae) associated with the Australian plant genus Eremophila (Myoporaceae). Records of the Western Australian Museum 18: 419-437	Article in Journal	Australia	no	Records of the Western Australian Museum	museum	WAMus
Apoidea	Hymenoptera	Euhesma	Euhesma	wowine		Valid	Species	Y	Exley	2002	Exley, E.M.	1	no	1004	Exley, E.M. 2002. Bees of the Euhesma crabronica species-group (Hymenoptera: Colletidae: Euryglossinae). Records of the Western Australian Museum 21: 203-211	Article in Journal	Australia	no	Records of the Western Australian Museum	museum	WAMus
Apoidea	Hymenoptera	Euhesma	Euhesma	xana		Valid	Species	Y	Exley	2001	Exley, E.M.	1	no	1003	Exley, E.M. 2001. The walkeriana species-group of Euhesma Michener (Hymenoptera: Colletidae: Euryglossinae). Australian Journal of Entomology 40: 102-112	Article in Journal	Australia	yes	Australian Journal of Entomology	society	AustEntSoc
Apoidea	Hymenoptera	Euhesma	Euhesma	yeatsi		Valid	Species	Y	Exley	2002	Exley, E.M.	1	no	1004	Exley, E.M. 2002. Bees of the Euhesma crabronica species-group (Hymenoptera: Colletidae: Euryglossinae). Records of the Western Australian Museum 21: 203-211	Article in Journal	Australia	no	Records of the Western Australian Museum	museum	WAMus
Apoidea	Hymenoptera	Euhesma	Euhesma	yellowdinensis		Valid	Species	N	Exley	1998	Exley, E.M.	1	no	1002	Exley, E.M. 1998. New Euryglossa (Euhesma) bees (Hymenoptera: Colletidae: Euryglossinae) associated with the Australian plant genus Eremophila (Myoporaceae). Records of the Western Australian Museum 18: 419-437	Article in Journal	Australia	no	Records of the Western Australian Museum	museum	WAMus
Apoidea	Hymenoptera	Euhesma	Parahesma	tuberculipes		Valid	Species	N	Michener	1965	Michener, C.D.	1	no	2014	Michener, C.D. 1965. A classification of the bees of the Australian and South Pacific regions. Bulletin of the American Museum of Natural History 130: 1-362 [Date published 31/12/1965]	Article in Journal	USA	no	Bulletin of the American Museum of Natural History	na	na
Apoidea	Hymenoptera	Euhesma		sulcata		Replaced by Euhesma stria Exley, 2008	Species	Y	Exley	2002	Exley, E.M.	1	no	1004	Exley, E.M. 2002. Bees of the Euhesma crabronica species-group (Hymenoptera: Colletidae: Euryglossinae). Records of the Western Australian Museum 21: 203-211	Article in Journal	Australia	no	Records of the Western Australian Museum	museum	WAMus
Apoidea	Hymenoptera	Eupliloides		alter		Valid	Species	Y	Leclercq	1996	Leclercq, J.	1	no	1717	Leclercq, J. 1996. Hyménoptères Sphécides Crabroniens du genre Eupliloides Pate, 1946 des régions orientale et australienne. Lambillionea, Revue Internationale d'Entomologie 96: 141-146	Article in Journal	Belgium	yes	Lambillionea, Revue Internationale d'Entomologie	na	na
Apoidea	Hymenoptera	Euryglossa		alincia		Valid	Species	Y	Exley	1976	Exley, E.M.	1	no	993	Exley, E.M. 1976. Revision of the subgenus Euryglossa Smith (Apoidea: Colletidae: Euryglossinae). Australian Journal of Zoology Supplementary Series 41: 1-72 [Date published 31/12/1976]	Article in Journal	Australia	no	Australian Journal of Zoology Supplementary Series	agency	CSIRO
Apoidea	Hymenoptera	Euryglossa		angelesi		Valid	Species	Y	Exley	1976	Exley, E.M.	1	no	993	Exley, E.M. 1976. Revision of the subgenus Euryglossa Smith (Apoidea: Colletidae: Euryglossinae). Australian Journal of Zoology Supplementary Series 41: 1-72 [Date published 31/12/1976]	Article in Journal	Australia	no	Australian Journal of Zoology Supplementary Series	agency	CSIRO
Apoidea	Hymenoptera	Euryglossa		calaina		Valid	Species	Y	Exley	1976	Exley, E.M.	1	no	993	Exley, E.M. 1976. Revision of the subgenus Euryglossa Smith (Apoidea: Colletidae: Euryglossinae). Australian Journal of Zoology Supplementary Series 41: 1-72 [Date published 31/12/1976]	Article in Journal	Australia	no	Australian Journal of Zoology Supplementary Series	agency	CSIRO
Apoidea	Hymenoptera	Euryglossa	Callohesma	tuberculata		Replaced by Euryglossa (Callohesma) tibialis Cardale, 1993	Species	R	Exley	1974	Exley, E.M.	1	no	988	Exley, E.M. 1974. Revision of the subgenus Callohesma Michener (Apoidea: Colletidae). Australian Journal of Zoology Supplementary Series 26: 1-58 [Date published 31/12/1974]	Article in Journal	Australia	no	Australian Journal of Zoology Supplementary Series	agency	CSIRO
Apoidea	Hymenoptera	Euryglossa		capitata		Valid	Species	Y	Exley	1976	Exley, E.M.	1	no	993	Exley, E.M. 1976. Revision of the subgenus Euryglossa Smith (Apoidea: Colletidae: Euryglossinae). Australian Journal of Zoology Supplementary Series 41: 1-72 [Date published 31/12/1976]	Article in Journal	Australia	no	Australian Journal of Zoology Supplementary Series	agency	CSIRO
Apoidea	Hymenoptera	Euryglossa		glabra		Valid	Species	Y	Exley	1976	Exley, E.M.	1	no	993	Exley, E.M. 1976. Revision of the subgenus Euryglossa Smith (Apoidea: Colletidae: Euryglossinae). Australian Journal of Zoology Supplementary Series 41: 1-72 [Date published 31/12/1976]	Article in Journal	Australia	no	Australian Journal of Zoology Supplementary Series	agency	CSIRO
Apoidea	Hymenoptera	Euryglossa		hardyi		Valid	Species	Y	Exley	1976	Exley, E.M.	1	no	993	Exley, E.M. 1976. Revision of the subgenus Euryglossa Smith (Apoidea: Colletidae: Euryglossinae). Australian Journal of Zoology Supplementary Series 41: 1-72 [Date published 31/12/1976]	Article in Journal	Australia	no	Australian Journal of Zoology Supplementary Series	agency	CSIRO
Apoidea	Hymenoptera	Euryglossa		homora		Valid	Species	Y	Exley	1976	Exley, E.M.	1	no	993	Exley, E.M. 1976. Revision of the subgenus Euryglossa Smith (Apoidea: Colletidae: Euryglossinae). Australian Journal of Zoology Supplementary Series 41: 1-72 [Date published 31/12/1976]	Article in Journal	Australia	no	Australian Journal of Zoology Supplementary Series	agency	CSIRO
Apoidea	Hymenoptera	Euryglossa		limata		Valid	Species	Y	Exley	1976	Exley, E.M.	1	no	993	Exley, E.M. 1976. Revision of the subgenus Euryglossa Smith (Apoidea: Colletidae: Euryglossinae). Australian Journal of Zoology Supplementary Series 41: 1-72 [Date published 31/12/1976]	Article in Journal	Australia	no	Australian Journal of Zoology Supplementary Series	agency	CSIRO
Apoidea	Hymenoptera	Euryglossa		liopa		Valid	Species	Y	Exley	1976	Exley, E.M.	1	no	993	Exley, E.M. 1976. Revision of the subgenus Euryglossa Smith (Apoidea: Colletidae: Euryglossinae). Australian Journal of Zoology Supplementary Series 41: 1-72 [Date published 31/12/1976]	Article in Journal	Australia	no	Australian Journal of Zoology Supplementary Series	agency	CSIRO
Apoidea	Hymenoptera	Euryglossa		millstreamensis		Valid	Species	Y	Exley	1976	Exley, E.M.	1	no	993	Exley, E.M. 1976. Revision of the subgenus Euryglossa Smith (Apoidea: Colletidae: Euryglossinae). Australian Journal of Zoology Supplementary Series 41: 1-72 [Date published 31/12/1976]	Article in Journal	Australia	no	Australian Journal of Zoology Supplementary Series	agency	CSIRO
Apoidea	Hymenoptera	Euryglossa		myrrhina		Valid	Species	Y	Exley	1976	Exley, E.M.	1	no	993	Exley, E.M. 1976. Revision of the subgenus Euryglossa Smith (Apoidea: Colletidae: Euryglossinae). Australian Journal of Zoology Supplementary Series 41: 1-72 [Date published 31/12/1976]	Article in Journal	Australia	no	Australian Journal of Zoology Supplementary Series	agency	CSIRO
Apoidea	Hymenoptera	Euryglossa		noosae		Valid	Species	Y	Exley	1976	Exley, E.M.	1	no	993	Exley, E.M. 1976. Revision of the subgenus Euryglossa Smith (Apoidea: Colletidae: Euryglossinae). Australian Journal of Zoology Supplementary Series 41: 1-72 [Date published 31/12/1976]	Article in Journal	Australia	no	Australian Journal of Zoology Supplementary Series	agency	CSIRO
Apoidea	Hymenoptera	Euryglossa		pammicta		Valid	Species	Y	Exley	1976	Exley, E.M.	1	no	993	Exley, E.M. 1976. Revision of the subgenus Euryglossa Smith (Apoidea: Colletidae: Euryglossinae). Australian Journal of Zoology Supplementary Series 41: 1-72 [Date published 31/12/1976]	Article in Journal	Australia	no	Australian Journal of Zoology Supplementary Series	agency	CSIRO
Apoidea	Hymenoptera	Euryglossa		tolgae		Valid	Species	Y	Exley	1976	Exley, E.M.	1	no	993	Exley, E.M. 1976. Revision of the subgenus Euryglossa Smith (Apoidea: Colletidae: Euryglossinae). Australian Journal of Zoology Supplementary Series 41: 1-72 [Date published 31/12/1976]	Article in Journal	Australia	no	Australian Journal of Zoology Supplementary Series	agency	CSIRO
Apoidea	Hymenoptera	Euryglossa		trichoda		Valid	Species	Y	Exley	1976	Exley, E.M.	1	no	993	Exley, E.M. 1976. Revision of the subgenus Euryglossa Smith (Apoidea: Colletidae: Euryglossinae). Australian Journal of Zoology Supplementary Series 41: 1-72 [Date published 31/12/1976]	Article in Journal	Australia	no	Australian Journal of Zoology Supplementary Series	agency	CSIRO
Apoidea	Hymenoptera	Euryglossina	Euryglossella	darwiniensis		Valid	Species	N	Exley	1974	Exley, E.M.	1	no	986	Exley, E.M. 1974. A contribution to our knowledge of Australia's smallest bees with descriptions of new species (Hymenoptera: Colletidae: Euryglossinae). Journal of the Australian Entomological Society 13: 1-9 [Date published 31/12/1974]	Article in Journal	Australia	yes	Journal of the Australian Entomological Society	society	AustEntSoc
Apoidea	Hymenoptera	Euryglossina	Euryglossella	incompleta		Valid	Species	N	Exley	1974	Exley, E.M.	1	no	986	Exley, E.M. 1974. A contribution to our knowledge of Australia's smallest bees with descriptions of new species (Hymenoptera: Colletidae: Euryglossinae). Journal of the Australian Entomological Society 13: 1-9 [Date published 31/12/1974]	Article in Journal	Australia	yes	Journal of the Australian Entomological Society	society	AustEntSoc
Apoidea	Hymenoptera	Euryglossina	Euryglossella	neominima		Valid	Species	N	Exley	1974	Exley, E.M.	1	no	986	Exley, E.M. 1974. A contribution to our knowledge of Australia's smallest bees with descriptions of new species (Hymenoptera: Colletidae: Euryglossinae). Journal of the Australian Entomological Society 13: 1-9 [Date published 31/12/1974]	Article in Journal	Australia	yes	Journal of the Australian Entomological Society	society	AustEntSoc
Apoidea	Hymenoptera	Euryglossina	Euryglossella	oenpelli		Valid	Species	N	Exley	1982	Exley, E.M.	1	no	998	Exley, E.M. 1982. The genus Euryglossella Cockerell (Hymenoptera: Apoidea). International Journal of Entomology 1: 21-29 [Date published 31/12/1982]	Article in Journal	USA	yes	International Journal of Entomology	na	na
Apoidea	Hymenoptera	Euryglossina	Euryglossella	perkinsi		Valid	Species	Y	Michener	1965	Michener, C.D.	1	no	2014	Michener, C.D. 1965. A classification of the bees of the Australian and South Pacific regions. Bulletin of the American Museum of Natural History 130: 1-362 [Date published 31/12/1965]	Article in Journal	USA	no	Bulletin of the American Museum of Natural History	na	na
Apoidea	Hymenoptera	Euryglossina	Euryglossella	weiri		Valid	Species	N	Exley	1974	Exley, E.M.	1	no	986	Exley, E.M. 1974. A contribution to our knowledge of Australia's smallest bees with descriptions of new species (Hymenoptera: Colletidae: Euryglossinae). Journal of the Australian Entomological Society 13: 1-9 [Date published 31/12/1974]	Article in Journal	Australia	yes	Journal of the Australian Entomological Society	society	AustEntSoc
Apoidea	Hymenoptera	Euryglossina	Euryglossina	atra		Valid	Species	Y	Exley	1968	Exley, E.M.	1	no	976	Exley, E.M. 1968. Revision of the genus Euryglossina Cockerell (Apoidea: Colletidae). Australian Journal of Zoology 16: 915-1020 [Date published 31/12/1968]	Article in Journal	Australia	no	Australian Journal of Zoology	agency	CSIRO
Apoidea	Hymenoptera	Euryglossina	Euryglossina	bowenensis		Valid	Species	Y	Exley	1968	Exley, E.M.	1	no	976	Exley, E.M. 1968. Revision of the genus Euryglossina Cockerell (Apoidea: Colletidae). Australian Journal of Zoology 16: 915-1020 [Date published 31/12/1968]	Article in Journal	Australia	no	Australian Journal of Zoology	agency	CSIRO
Apoidea	Hymenoptera	Euryglossina	Euryglossina	clypearis		Valid	Species	Y	Exley	1976	Exley, E.M.	1	no	991	Exley, E.M. 1976. New species and records of Euryglossina Cockerell (Apoidea: Colletidae: Euryglossinae). Journal of the Australian Entomological Society 15: 273-279 [Date published 31/12/1976]	Article in Journal	Australia	yes	Journal of the Australian Entomological Society	society	AustEntSoc
Apoidea	Hymenoptera	Euryglossina	Euryglossina	douglasi		Valid	Species	Y	Exley	1968	Exley, E.M.	1	no	976	Exley, E.M. 1968. Revision of the genus Euryglossina Cockerell (Apoidea: Colletidae). Australian Journal of Zoology 16: 915-1020 [Date published 31/12/1968]	Article in Journal	Australia	no	Australian Journal of Zoology	agency	CSIRO
Apoidea	Hymenoptera	Euryglossina	Euryglossina	gigantocephala		Valid	Species	Y	Exley	1968	Exley, E.M.	1	no	976	Exley, E.M. 1968. Revision of the genus Euryglossina Cockerell (Apoidea: Colletidae). Australian Journal of Zoology 16: 915-1020 [Date published 31/12/1968]	Article in Journal	Australia	no	Australian Journal of Zoology	agency	CSIRO
Apoidea	Hymenoptera	Euryglossina	Euryglossina	glenmorganensis		Valid	Species	Y	Exley	1968	Exley, E.M.	1	no	976	Exley, E.M. 1968. Revision of the genus Euryglossina Cockerell (Apoidea: Colletidae). Australian Journal of Zoology 16: 915-1020 [Date published 31/12/1968]	Article in Journal	Australia	no	Australian Journal of Zoology	agency	CSIRO
Apoidea	Hymenoptera	Euryglossina	Euryglossina	haemodonta		Valid	Species	Y	Exley	1969	Exley, E.M.	1	no	982	Exley, E.M. 1969. A supplement to the revision of Euryglossina (Apoidea: Colletidae). Journal of the Australian Entomological Society 8: 139-144 [Date published 31/12/1969]	Article in Journal	Australia	yes	Journal of the Australian Entomological Society	society	AustEntSoc
Apoidea	Hymenoptera	Euryglossina	Euryglossina	healesvillensis		Valid	Species	Y	Exley	1968	Exley, E.M.	1	no	976	Exley, E.M. 1968. Revision of the genus Euryglossina Cockerell (Apoidea: Colletidae). Australian Journal of Zoology 16: 915-1020 [Date published 31/12/1968]	Article in Journal	Australia	no	Australian Journal of Zoology	agency	CSIRO
Apoidea	Hymenoptera	Euryglossina	Euryglossina	intermedia		Valid	Species	Y	Michener	1965	Michener, C.D.	1	no	2014	Michener, C.D. 1965. A classification of the bees of the Australian and South Pacific regions. Bulletin of the American Museum of Natural History 130: 1-362 [Date published 31/12/1965]	Article in Journal	USA	no	Bulletin of the American Museum of Natural History	na	na
Apoidea	Hymenoptera	Euryglossina	Euryglossina	kellyi		Valid	Species	Y	Exley	1968	Exley, E.M.	1	no	976	Exley, E.M. 1968. Revision of the genus Euryglossina Cockerell (Apoidea: Colletidae). Australian Journal of Zoology 16: 915-1020 [Date published 31/12/1968]	Article in Journal	Australia	no	Australian Journal of Zoology	agency	CSIRO
Apoidea	Hymenoptera	Euryglossina	Euryglossina	lobiocula		Valid	Species	Y	Exley	1968	Exley, E.M.	1	no	976	Exley, E.M. 1968. Revision of the genus Euryglossina Cockerell (Apoidea: Colletidae). Australian Journal of Zoology 16: 915-1020 [Date published 31/12/1968]	Article in Journal	Australia	no	Australian Journal of Zoology	agency	CSIRO
Apoidea	Hymenoptera	Euryglossina	Euryglossina	nigra		Valid	Species	Y	Exley	1968	Exley, E.M.	1	no	976	Exley, E.M. 1968. Revision of the genus Euryglossina Cockerell (Apoidea: Colletidae). Australian Journal of Zoology 16: 915-1020 [Date published 31/12/1968]	Article in Journal	Australia	no	Australian Journal of Zoology	agency	CSIRO
Apoidea	Hymenoptera	Euryglossina	Euryglossina	storeyi		Valid	Species	Y	Exley	1976	Exley, E.M.	1	no	991	Exley, E.M. 1976. New species and records of Euryglossina Cockerell (Apoidea: Colletidae: Euryglossinae). Journal of the Australian Entomological Society 15: 273-279 [Date published 31/12/1976]	Article in Journal	Australia	yes	Journal of the Australian Entomological Society	society	AustEntSoc
Apoidea	Hymenoptera	Euryglossina	Euryglossina	stygica		Valid	Species	Y	Exley	1968	Exley, E.M.	1	no	976	Exley, E.M. 1968. Revision of the genus Euryglossina Cockerell (Apoidea: Colletidae). Australian Journal of Zoology 16: 915-1020 [Date published 31/12/1968]	Article in Journal	Australia	no	Australian Journal of Zoology	agency	CSIRO
Apoidea	Hymenoptera	Euryglossina	Euryglossina	townsvillensis		Valid	Species	Y	Exley	1968	Exley, E.M.	1	no	976	Exley, E.M. 1968. Revision of the genus Euryglossina Cockerell (Apoidea: Colletidae). Australian Journal of Zoology 16: 915-1020 [Date published 31/12/1968]	Article in Journal	Australia	no	Australian Journal of Zoology	agency	CSIRO
Apoidea	Hymenoptera	Euryglossina	Quasihesma	cardaleae		Valid	Species	N	Exley	1968	Exley, E.M.	1	no	974	Exley, E.M. 1968. Quasihesma--a new genus of Australian bees (Apoidea: Colletidae). Australian Journal of Zoology 16: 227-235 [Date published 31/12/1968]	Article in Journal	Australia	no	Australian Journal of Zoology	agency	CSIRO
Apoidea	Hymenoptera	Euryglossina	Quasihesma	clypearis		Valid	Species	N	Exley	1980	Exley, E.M.	1	no	997	Exley, E.M. 1980. New species and records of Quasihesma Exley (Hymenoptera: Apoidea: Euryglossinae). Journal of the Australian Entomological Society 19: 161-170 [Date published 31/12/1980]	Article in Journal	Australia	yes	Journal of the Australian Entomological Society	society	AustEntSoc
Apoidea	Hymenoptera	Euryglossina	Quasihesma	doddi		Valid	Species	N	Exley	1968	Exley, E.M.	1	no	974	Exley, E.M. 1968. Quasihesma--a new genus of Australian bees (Apoidea: Colletidae). Australian Journal of Zoology 16: 227-235 [Date published 31/12/1968]	Article in Journal	Australia	no	Australian Journal of Zoology	agency	CSIRO
Apoidea	Hymenoptera	Euryglossina	Quasihesma	gigantica		Valid	Species	N	Exley	1974	Exley, E.M.	1	no	986	Exley, E.M. 1974. A contribution to our knowledge of Australia's smallest bees with descriptions of new species (Hymenoptera: Colletidae: Euryglossinae). Journal of the Australian Entomological Society 13: 1-9 [Date published 31/12/1974]	Article in Journal	Australia	yes	Journal of the Australian Entomological Society	society	AustEntSoc
Apoidea	Hymenoptera	Euryglossina	Quasihesma	leucognatha		Valid	Species	N	Exley	1974	Exley, E.M.	1	no	986	Exley, E.M. 1974. A contribution to our knowledge of Australia's smallest bees with descriptions of new species (Hymenoptera: Colletidae: Euryglossinae). Journal of the Australian Entomological Society 13: 1-9 [Date published 31/12/1974]	Article in Journal	Australia	yes	Journal of the Australian Entomological Society	society	AustEntSoc
Apoidea	Hymenoptera	Euryglossina	Quasihesma	melanognatha		Valid	Species	N	Exley	1980	Exley, E.M.	1	no	997	Exley, E.M. 1980. New species and records of Quasihesma Exley (Hymenoptera: Apoidea: Euryglossinae). Journal of the Australian Entomological Society 19: 161-170 [Date published 31/12/1980]	Article in Journal	Australia	yes	Journal of the Australian Entomological Society	society	AustEntSoc
Apoidea	Hymenoptera	Euryglossina	Quasihesma	moonbiensis		Valid	Species	N	Exley	1968	Exley, E.M.	1	no	974	Exley, E.M. 1968. Quasihesma--a new genus of Australian bees (Apoidea: Colletidae). Australian Journal of Zoology 16: 227-235 [Date published 31/12/1968]	Article in Journal	Australia	no	Australian Journal of Zoology	agency	CSIRO
Apoidea	Hymenoptera	Euryglossina	Quasihesma	scapata		Valid	Species	N	Exley	1980	Exley, E.M.	1	no	997	Exley, E.M. 1980. New species and records of Quasihesma Exley (Hymenoptera: Apoidea: Euryglossinae). Journal of the Australian Entomological Society 19: 161-170 [Date published 31/12/1980]	Article in Journal	Australia	yes	Journal of the Australian Entomological Society	society	AustEntSoc
Apoidea	Hymenoptera	Euryglossina	Quasihesma	tuberculata		Valid	Species	N	Exley	1980	Exley, E.M.	1	no	997	Exley, E.M. 1980. New species and records of Quasihesma Exley (Hymenoptera: Apoidea: Euryglossinae). Journal of the Australian Entomological Society 19: 161-170 [Date published 31/12/1980]	Article in Journal	Australia	yes	Journal of the Australian Entomological Society	society	AustEntSoc
Apoidea	Hymenoptera	Euryglossina	Quasihesma	walkeri		Valid	Species	N	Exley	1980	Exley, E.M.	1	no	997	Exley, E.M. 1980. New species and records of Quasihesma Exley (Hymenoptera: Apoidea: Euryglossinae). Journal of the Australian Entomological Society 19: 161-170 [Date published 31/12/1980]	Article in Journal	Australia	yes	Journal of the Australian Entomological Society	society	AustEntSoc
Apoidea	Hymenoptera	Euryglossina	Turnerella	angulifacies		Valid	Species	Y	Exley	1968	Exley, E.M.	1	no	976	Exley, E.M. 1968. Revision of the genus Euryglossina Cockerell (Apoidea: Colletidae). Australian Journal of Zoology 16: 915-1020 [Date published 31/12/1968]	Article in Journal	Australia	no	Australian Journal of Zoology	agency	CSIRO
Apoidea	Hymenoptera	Euryglossina	Turnerella	argocephala		Valid	Species	Y	Exley	1968	Exley, E.M.	1	no	976	Exley, E.M. 1968. Revision of the genus Euryglossina Cockerell (Apoidea: Colletidae). Australian Journal of Zoology 16: 915-1020 [Date published 31/12/1968]	Article in Journal	Australia	no	Australian Journal of Zoology	agency	CSIRO
Apoidea	Hymenoptera	Euryglossina	Turnerella	aurantia		Valid	Species	Y	Exley	1969	Exley, E.M.	1	no	982	Exley, E.M. 1969. A supplement to the revision of Euryglossina (Apoidea: Colletidae). Journal of the Australian Entomological Society 8: 139-144 [Date published 31/12/1969]	Article in Journal	Australia	yes	Journal of the Australian Entomological Society	society	AustEntSoc
Apoidea	Hymenoptera	Euryglossina	Turnerella	crococephala		Valid	Species	Y	Exley	1968	Exley, E.M.	1	no	976	Exley, E.M. 1968. Revision of the genus Euryglossina Cockerell (Apoidea: Colletidae). Australian Journal of Zoology 16: 915-1020 [Date published 31/12/1968]	Article in Journal	Australia	no	Australian Journal of Zoology	agency	CSIRO
Apoidea	Hymenoptera	Euryglossina	Turnerella	gracilis		Valid	Species	Y	Exley	1968	Exley, E.M.	1	no	976	Exley, E.M. 1968. Revision of the genus Euryglossina Cockerell (Apoidea: Colletidae). Australian Journal of Zoology 16: 915-1020 [Date published 31/12/1968]	Article in Journal	Australia	no	Australian Journal of Zoology	agency	CSIRO
Apoidea	Hymenoptera	Euryglossina	Turnerella	grandigena		Valid	Species	Y	Exley	1968	Exley, E.M.	1	no	976	Exley, E.M. 1968. Revision of the genus Euryglossina Cockerell (Apoidea: Colletidae). Australian Journal of Zoology 16: 915-1020 [Date published 31/12/1968]	Article in Journal	Australia	no	Australian Journal of Zoology	agency	CSIRO
Apoidea	Hymenoptera	Euryglossina	Turnerella	leyburnensis		Valid	Species	Y	Exley	1983	Exley, E.M.	1	no	999	Exley, E.M. 1983. A remarkable bee from Eastern Australia (Hymenoptera: Apoidea: Colletidae). Journal of the Australian Entomological Society 22: 293-294 [Date published 31/12/1983]	Article in Journal	Australia	yes	Journal of the Australian Entomological Society	society	AustEntSoc
Apoidea	Hymenoptera	Euryglossina	Turnerella	megalocephala		Valid	Species	Y	Exley	1968	Exley, E.M.	1	no	976	Exley, E.M. 1968. Revision of the genus Euryglossina Cockerell (Apoidea: Colletidae). Australian Journal of Zoology 16: 915-1020 [Date published 31/12/1968]	Article in Journal	Australia	no	Australian Journal of Zoology	agency	CSIRO
Apoidea	Hymenoptera	Euryglossina	Turnerella	melanocephala		Valid	Species	Y	Exley	1968	Exley, E.M.	1	no	976	Exley, E.M. 1968. Revision of the genus Euryglossina Cockerell (Apoidea: Colletidae). Australian Journal of Zoology 16: 915-1020 [Date published 31/12/1968]	Article in Journal	Australia	no	Australian Journal of Zoology	agency	CSIRO
Apoidea	Hymenoptera	Euryglossina	Turnerella	micheneri		Valid	Species	Y	Exley	1968	Exley, E.M.	1	no	976	Exley, E.M. 1968. Revision of the genus Euryglossina Cockerell (Apoidea: Colletidae). Australian Journal of Zoology 16: 915-1020 [Date published 31/12/1968]	Article in Journal	Australia	no	Australian Journal of Zoology	agency	CSIRO
Apoidea	Hymenoptera	Euryglossina	Turnerella	polita		Valid	Species	Y	Exley	1968	Exley, E.M.	1	no	976	Exley, E.M. 1968. Revision of the genus Euryglossina Cockerell (Apoidea: Colletidae). Australian Journal of Zoology 16: 915-1020 [Date published 31/12/1968]	Article in Journal	Australia	no	Australian Journal of Zoology	agency	CSIRO
Apoidea	Hymenoptera	Euryglossina	Turnerella	proserpinensis		Valid	Species	Y	Exley	1968	Exley, E.M.	1	no	976	Exley, E.M. 1968. Revision of the genus Euryglossina Cockerell (Apoidea: Colletidae). Australian Journal of Zoology 16: 915-1020 [Date published 31/12/1968]	Article in Journal	Australia	no	Australian Journal of Zoology	agency	CSIRO
Apoidea	Hymenoptera	Euryglossina	Turnerella	pseudoatomaria		Valid	Species	Y	Exley	1968	Exley, E.M.	1	no	976	Exley, E.M. 1968. Revision of the genus Euryglossina Cockerell (Apoidea: Colletidae). Australian Journal of Zoology 16: 915-1020 [Date published 31/12/1968]	Article in Journal	Australia	no	Australian Journal of Zoology	agency	CSIRO
Apoidea	Hymenoptera	Euryglossina	Turnerella	psilosoma		Valid	Species	Y	Exley	1968	Exley, E.M.	1	no	976	Exley, E.M. 1968. Revision of the genus Euryglossina Cockerell (Apoidea: Colletidae). Australian Journal of Zoology 16: 915-1020 [Date published 31/12/1968]	Article in Journal	Australia	no	Australian Journal of Zoology	agency	CSIRO
Apoidea	Hymenoptera	Euryglossina	Turnerella	pulcherrima		Valid	Species	Y	Exley	1968	Exley, E.M.	1	no	976	Exley, E.M. 1968. Revision of the genus Euryglossina Cockerell (Apoidea: Colletidae). Australian Journal of Zoology 16: 915-1020 [Date published 31/12/1968]	Article in Journal	Australia	no	Australian Journal of Zoology	agency	CSIRO
Apoidea	Hymenoptera	Euryglossina	Turnerella	pulchra		Valid	Species	Y	Exley	1968	Exley, E.M.	1	no	976	Exley, E.M. 1968. Revision of the genus Euryglossina Cockerell (Apoidea: Colletidae). Australian Journal of Zoology 16: 915-1020 [Date published 31/12/1968]	Article in Journal	Australia	no	Australian Journal of Zoology	agency	CSIRO
Apoidea	Hymenoptera	Euryglossina	Turnerella	sulcata		Valid	Species	Y	Exley	1968	Exley, E.M.	1	no	976	Exley, E.M. 1968. Revision of the genus Euryglossina Cockerell (Apoidea: Colletidae). Australian Journal of Zoology 16: 915-1020 [Date published 31/12/1968]	Article in Journal	Australia	no	Australian Journal of Zoology	agency	CSIRO
Apoidea	Hymenoptera	Euryglossina	Turnerella	xanthocephala		Valid	Species	Y	Exley	1968	Exley, E.M.	1	no	976	Exley, E.M. 1968. Revision of the genus Euryglossina Cockerell (Apoidea: Colletidae). Australian Journal of Zoology 16: 915-1020 [Date published 31/12/1968]	Article in Journal	Australia	no	Australian Journal of Zoology	agency	CSIRO
Apoidea	Hymenoptera	Euryglossula		carnarvonensis		Valid	Species	Y	Exley	1968	Exley, E.M.	1	no	977	Exley, E.M. 1968. Revision of the genus Euryglossula Michener (Apoidea: Colletidae). Australian Journal of Zoology 16: 203-217 [Date published 31/12/1968]	Article in Journal	Australia	no	Australian Journal of Zoology	agency	CSIRO
Apoidea	Hymenoptera	Euryglossula		deserti		Valid	Species	Y	Exley	1968	Exley, E.M.	1	no	977	Exley, E.M. 1968. Revision of the genus Euryglossula Michener (Apoidea: Colletidae). Australian Journal of Zoology 16: 203-217 [Date published 31/12/1968]	Article in Journal	Australia	no	Australian Journal of Zoology	agency	CSIRO
Apoidea	Hymenoptera	Euryglossula		flava		Valid	Species	Y	Exley	1968	Exley, E.M.	1	no	977	Exley, E.M. 1968. Revision of the genus Euryglossula Michener (Apoidea: Colletidae). Australian Journal of Zoology 16: 203-217 [Date published 31/12/1968]	Article in Journal	Australia	no	Australian Journal of Zoology	agency	CSIRO
Apoidea	Hymenoptera	Euryglossula		variepicta		Valid	Species	Y	Exley	1969	Exley, E.M.	1	no	980	Exley, E.M. 1969. A new species of Euryglossula (Apoidea: Colletidae). Journal of the Australian Entomological Society 8: 137-138 [Date published 31/12/1969]	Article in Journal	Australia	yes	Journal of the Australian Entomological Society	society	AustEntSoc
Apoidea	Hymenoptera	Exoneura	Exoneura	obscuripes		Valid	Species	Y	Michener	1963	Michener, C.D.	1	no	2013	Michener, C.D. 1963. New Ceratinini from Australia (Hymenoptera, Apoidea). University of Kansas Science Bulletin 44: 257-261 [Date published 31/12/1963]	Article in Journal	USA	no	University of Kansas Science Bulletin	na	na
Apoidea	Hymenoptera	Exoneura	Inquilina	schwarzi		Valid	Species	N	Michener	1983	Michener, C.D.	1	no	2015	Michener, C.D. 1983. The parasitic Australian allodapine genus Inquilina (Hymenoptera, Anthophoridae). Journal of the Kansas Entomological Society 56: 555-559 [Date published 31/12/1983]	Article in Journal	USA	yes	Journal of the Kansas Entomological Society	na	na
Apoidea	Hymenoptera	Exoneurella		eremophila		Valid	Species	N	Houston	1976	Houston, T.F.	1	no	1335	Houston, T.F. 1976. New Australian allodapine bees (subgenus Exoneurella Michener) and their immatures (Hymenoptera: Anthophoridae). Transactions of the Royal Society of South Australia 100: 15-28 [Date published 31/12/1976]	Article in Journal	Australia	no	Transactions of the Royal Society of South Australia	society	RoySocSA
Apoidea	Hymenoptera	Exoneurella		setosa		Valid	Species	N	Houston	1976	Houston, T.F.	1	no	1335	Houston, T.F. 1976. New Australian allodapine bees (subgenus Exoneurella Michener) and their immatures (Hymenoptera: Anthophoridae). Transactions of the Royal Society of South Australia 100: 15-28 [Date published 31/12/1976]	Article in Journal	Australia	no	Transactions of the Royal Society of South Australia	society	RoySocSA
Apoidea	Hymenoptera	Exoneurella		tridentata		Valid	Species	N	Houston	1976	Houston, T.F.	1	no	1335	Houston, T.F. 1976. New Australian allodapine bees (subgenus Exoneurella Michener) and their immatures (Hymenoptera: Anthophoridae). Transactions of the Royal Society of South Australia 100: 15-28 [Date published 31/12/1976]	Article in Journal	Australia	no	Transactions of the Royal Society of South Australia	society	RoySocSA
Apoidea	Hymenoptera	Glossurocolletes		bilobatus		Valid	Species	N	Michener	1965	Michener, C.D.	1	no	2014	Michener, C.D. 1965. A classification of the bees of the Australian and South Pacific regions. Bulletin of the American Museum of Natural History 130: 1-362 [Date published 31/12/1965]	Article in Journal	USA	no	Bulletin of the American Museum of Natural History	na	na
Apoidea	Hymenoptera	Glossurocolletes		xenoceratus		Valid	Species	N	Michener	1965	Michener, C.D.	1	no	2014	Michener, C.D. 1965. A classification of the bees of the Australian and South Pacific regions. Bulletin of the American Museum of Natural History 130: 1-362 [Date published 31/12/1965]	Article in Journal	USA	no	Bulletin of the American Museum of Natural History	na	na
Apoidea	Hymenoptera	Hesperocolletes		douglasi		Valid	Species	Y	Michener	1965	Michener, C.D.	1	no	2014	Michener, C.D. 1965. A classification of the bees of the Australian and South Pacific regions. Bulletin of the American Museum of Natural History 130: 1-362 [Date published 31/12/1965]	Article in Journal	USA	no	Bulletin of the American Museum of Natural History	na	na
Apoidea	Hymenoptera	Heterohesma		weiri		Valid	Species	Y	Exley	1983	Exley, E.M.	1	no	1000	Exley, E.M. 1983. The genus Heterohesma Michener (Hymenoptera: Apoidea: Colletidae). Journal of the Australian Entomological Society 22: 219-221 [Date published 31/12/1983]	Article in Journal	Australia	yes	Journal of the Australian Entomological Society	society	AustEntSoc
Apoidea	Hymenoptera	Homalictus	Homalictus	adiazetus		Valid	Species	Y	Walker	1997	Walker, K.	1	no	3173	Walker, K. 1997. Supplement to a revision of Australian members of the bee genus Homalictus (Cockerell) (Hymenoptera: Halictidae). Memoirs of Museum Victoria 56(1): 69-82 [Date published February]	Article in Journal	Australia	no	Memoirs of Museum Victoria	museum	MusVic
Apoidea	Hymenoptera	Homalictus	Homalictus	atrus		Valid	Species	Y	Walker	1986	Walker, K.L.	1	no	3174	Walker, K.L. 1986. Revision of the Australian species of the genus Homalictus Cockerell (Hymenoptera: Halictidae). Memoirs of Museum Victoria 47: 105-200 [Date published 31/12/1986]	Article in Journal	Australia	no	Memoirs of Museum Victoria	museum	MusVic
Apoidea	Hymenoptera	Homalictus	Homalictus	ctenander		Valid	Species	Y	Michener	1965	Michener, C.D.	1	no	2014	Michener, C.D. 1965. A classification of the bees of the Australian and South Pacific regions. Bulletin of the American Museum of Natural History 130: 1-362 [Date published 31/12/1965]	Article in Journal	USA	no	Bulletin of the American Museum of Natural History	na	na
Apoidea	Hymenoptera	Homalictus	Homalictus	exleyae		Valid	Species	Y	Walker	1986	Walker, K.L.	1	no	3174	Walker, K.L. 1986. Revision of the Australian species of the genus Homalictus Cockerell (Hymenoptera: Halictidae). Memoirs of Museum Victoria 47: 105-200 [Date published 31/12/1986]	Article in Journal	Australia	no	Memoirs of Museum Victoria	museum	MusVic
Apoidea	Hymenoptera	Homalictus	Homalictus	exophthalmus		Valid	Species	Y	Walker	1986	Walker, K.L.	1	no	3174	Walker, K.L. 1986. Revision of the Australian species of the genus Homalictus Cockerell (Hymenoptera: Halictidae). Memoirs of Museum Victoria 47: 105-200 [Date published 31/12/1986]	Article in Journal	Australia	no	Memoirs of Museum Victoria	museum	MusVic
Apoidea	Hymenoptera	Homalictus	Homalictus	forrestae		Valid	Species	Y	Walker	1986	Walker, K.L.	1	no	3174	Walker, K.L. 1986. Revision of the Australian species of the genus Homalictus Cockerell (Hymenoptera: Halictidae). Memoirs of Museum Victoria 47: 105-200 [Date published 31/12/1986]	Article in Journal	Australia	no	Memoirs of Museum Victoria	museum	MusVic
Apoidea	Hymenoptera	Homalictus	Homalictus	grossopedalus		Valid	Species	Y	Walker	1986	Walker, K.L.	1	no	3174	Walker, K.L. 1986. Revision of the Australian species of the genus Homalictus Cockerell (Hymenoptera: Halictidae). Memoirs of Museum Victoria 47: 105-200 [Date published 31/12/1986]	Article in Journal	Australia	no	Memoirs of Museum Victoria	museum	MusVic
Apoidea	Hymenoptera	Homalictus	Homalictus	houstoni		Valid	Species	Y	Walker	1986	Walker, K.L.	1	no	3174	Walker, K.L. 1986. Revision of the Australian species of the genus Homalictus Cockerell (Hymenoptera: Halictidae). Memoirs of Museum Victoria 47: 105-200 [Date published 31/12/1986]	Article in Journal	Australia	no	Memoirs of Museum Victoria	museum	MusVic
Apoidea	Hymenoptera	Homalictus	Homalictus	imitatus		Valid	Species	Y	Walker	1986	Walker, K.L.	1	no	3174	Walker, K.L. 1986. Revision of the Australian species of the genus Homalictus Cockerell (Hymenoptera: Halictidae). Memoirs of Museum Victoria 47: 105-200 [Date published 31/12/1986]	Article in Journal	Australia	no	Memoirs of Museum Victoria	museum	MusVic
Apoidea	Hymenoptera	Homalictus	Homalictus	multicavus		Valid	Species	Y	Walker	1986	Walker, K.L.	1	no	3174	Walker, K.L. 1986. Revision of the Australian species of the genus Homalictus Cockerell (Hymenoptera: Halictidae). Memoirs of Museum Victoria 47: 105-200 [Date published 31/12/1986]	Article in Journal	Australia	no	Memoirs of Museum Victoria	museum	MusVic
Apoidea	Hymenoptera	Homalictus	Homalictus	pectinalus		Valid	Species	Y	Walker	1986	Walker, K.L.	1	no	3174	Walker, K.L. 1986. Revision of the Australian species of the genus Homalictus Cockerell (Hymenoptera: Halictidae). Memoirs of Museum Victoria 47: 105-200 [Date published 31/12/1986]	Article in Journal	Australia	no	Memoirs of Museum Victoria	museum	MusVic
Apoidea	Hymenoptera	Homalictus	Homalictus	pilosigyna		Valid	Species	Y	Walker	1997	Walker, K.	1	no	3173	Walker, K. 1997. Supplement to a revision of Australian members of the bee genus Homalictus (Cockerell) (Hymenoptera: Halictidae). Memoirs of Museum Victoria 56(1): 69-82 [Date published February]	Article in Journal	Australia	no	Memoirs of Museum Victoria	museum	MusVic
Apoidea	Hymenoptera	Homalictus	Homalictus	verticulus		Valid	Species	Y	Walker	1997	Walker, K.	1	no	3173	Walker, K. 1997. Supplement to a revision of Australian members of the bee genus Homalictus (Cockerell) (Hymenoptera: Halictidae). Memoirs of Museum Victoria 56(1): 69-82 [Date published February]	Article in Journal	Australia	no	Memoirs of Museum Victoria	museum	MusVic
Apoidea	Hymenoptera	Homalictus	Papualictus	megagnathus		Valid	Species	Y	Walker	1997	Walker, K.	1	no	3173	Walker, K. 1997. Supplement to a revision of Australian members of the bee genus Homalictus (Cockerell) (Hymenoptera: Halictidae). Memoirs of Museum Victoria 56(1): 69-82 [Date published February]	Article in Journal	Australia	no	Memoirs of Museum Victoria	museum	MusVic
Apoidea	Hymenoptera	Homalictus	Quasilictus	brevicornutus		Valid	Species	Y	Walker	1986	Walker, K.L.	1	no	3174	Walker, K.L. 1986. Revision of the Australian species of the genus Homalictus Cockerell (Hymenoptera: Halictidae). Memoirs of Museum Victoria 47: 105-200 [Date published 31/12/1986]	Article in Journal	Australia	no	Memoirs of Museum Victoria	museum	MusVic
Apoidea	Hymenoptera	Homalictus		sicarius		Valid	Species	Y	Walker	1997	Walker, K.	1	no	3173	Walker, K. 1997. Supplement to a revision of Australian members of the bee genus Homalictus (Cockerell) (Hymenoptera: Halictidae). Memoirs of Museum Victoria 56(1): 69-82 [Date published February]	Article in Journal	Australia	no	Memoirs of Museum Victoria	museum	MusVic
Apoidea	Hymenoptera	Hylaeus	Edriohylaeus	ofarrelli		Valid	Species	Y	Michener	1965	Michener, C.D.	1	no	2014	Michener, C.D. 1965. A classification of the bees of the Australian and South Pacific regions. Bulletin of the American Museum of Natural History 130: 1-362 [Date published 31/12/1965]	Article in Journal	USA	no	Bulletin of the American Museum of Natural History	na	na
Apoidea	Hymenoptera	Hylaeus	Euprosopoides	perconvergens		Synonym of Hylaeus (Euprosopoides) obtusatus Michener, 1965	Species	Y	Michener	1965	Michener, C.D.	1	no	2014	Michener, C.D. 1965. A classification of the bees of the Australian and South Pacific regions. Bulletin of the American Museum of Natural History 130: 1-362 [Date published 31/12/1965]	Article in Journal	USA	no	Bulletin of the American Museum of Natural History	na	na
Apoidea	Hymenoptera	Hylaeus	Heterapoides	digitatus		Valid	Species	N	Houston	1975	Houston, T.F.	1	no	1334	Houston, T.F. 1975. A revision of the Australian hylaeine bees (Hymenoptera: Colletidae). I. Australian Journal of Zoology Supplementary Series 36: 1-135 [Date published 31/12/1975]	Article in Journal	Australia	no	Australian Journal of Zoology Supplementary Series	agency	CSIRO
Apoidea	Hymenoptera	Hylaeus	Heterapoides	exleyae		Valid	Species	N	Houston	1975	Houston, T.F.	1	no	1334	Houston, T.F. 1975. A revision of the Australian hylaeine bees (Hymenoptera: Colletidae). I. Australian Journal of Zoology Supplementary Series 36: 1-135 [Date published 31/12/1975]	Article in Journal	Australia	no	Australian Journal of Zoology Supplementary Series	agency	CSIRO
Apoidea	Hymenoptera	Hylaeus	Heterapoides	leviceps		Valid	Species	N	Houston	1975	Houston, T.F.	1	no	1334	Houston, T.F. 1975. A revision of the Australian hylaeine bees (Hymenoptera: Colletidae). I. Australian Journal of Zoology Supplementary Series 36: 1-135 [Date published 31/12/1975]	Article in Journal	Australia	no	Australian Journal of Zoology Supplementary Series	agency	CSIRO
Apoidea	Hymenoptera	Hylaeus	Heterapoides	nigriconcavus		Valid	Species	N	Houston	1975	Houston, T.F.	1	no	1334	Houston, T.F. 1975. A revision of the Australian hylaeine bees (Hymenoptera: Colletidae). I. Australian Journal of Zoology Supplementary Series 36: 1-135 [Date published 31/12/1975]	Article in Journal	Australia	no	Australian Journal of Zoology Supplementary Series	agency	CSIRO
Apoidea	Hymenoptera	Hylaeus	Hylaeteron	douglasi		Valid	Species	Y	Michener	1965	Michener, C.D.	1	no	2014	Michener, C.D. 1965. A classification of the bees of the Australian and South Pacific regions. Bulletin of the American Museum of Natural History 130: 1-362 [Date published 31/12/1965]	Article in Journal	USA	no	Bulletin of the American Museum of Natural History	na	na
Apoidea	Hymenoptera	Hylaeus	Hylaeteron	hemirhodus		Valid	Species	Y	Michener	1965	Michener, C.D.	1	no	2014	Michener, C.D. 1965. A classification of the bees of the Australian and South Pacific regions. Bulletin of the American Museum of Natural History 130: 1-362 [Date published 31/12/1965]	Article in Journal	USA	no	Bulletin of the American Museum of Natural History	na	na
Apoidea	Hymenoptera	Hylaeus	Hylaeteron	murrumbidgeanus		Valid	Species	Y	Houston	1981	Houston, T.F.	1	no	1336	Houston, T.F. 1981. A revision of the Australian hylaeine bees (Hymenoptera: Colletidae). II. Australian Journal of Zoology Supplementary Series 80: 1-128 [Date published 31/12/1981]	Article in Journal	Australia	no	Australian Journal of Zoology Supplementary Series	agency	CSIRO
Apoidea	Hymenoptera	Hylaeus	Hylaeteron	riekianus		Valid	Species	Y	Houston	1981	Houston, T.F.	1	no	1336	Houston, T.F. 1981. A revision of the Australian hylaeine bees (Hymenoptera: Colletidae). II. Australian Journal of Zoology Supplementary Series 80: 1-128 [Date published 31/12/1981]	Article in Journal	Australia	no	Australian Journal of Zoology Supplementary Series	agency	CSIRO
Apoidea	Hymenoptera	Hylaeus	Planihylaeus	daviesiae		Valid	Species	Y	Houston	1981	Houston, T.F.	1	no	1336	Houston, T.F. 1981. A revision of the Australian hylaeine bees (Hymenoptera: Colletidae). II. Australian Journal of Zoology Supplementary Series 80: 1-128 [Date published 31/12/1981]	Article in Journal	Australia	no	Australian Journal of Zoology Supplementary Series	agency	CSIRO
Apoidea	Hymenoptera	Hylaeus	Planihylaeus	jacksoniae		Valid	Species	Y	Houston	1981	Houston, T.F.	1	no	1336	Houston, T.F. 1981. A revision of the Australian hylaeine bees (Hymenoptera: Colletidae). II. Australian Journal of Zoology Supplementary Series 80: 1-128 [Date published 31/12/1981]	Article in Journal	Australia	no	Australian Journal of Zoology Supplementary Series	agency	CSIRO
Apoidea	Hymenoptera	Hylaeus	Planihylaeus	probligenatus		Valid	Species	Y	Houston	1981	Houston, T.F.	1	no	1336	Houston, T.F. 1981. A revision of the Australian hylaeine bees (Hymenoptera: Colletidae). II. Australian Journal of Zoology Supplementary Series 80: 1-128 [Date published 31/12/1981]	Article in Journal	Australia	no	Australian Journal of Zoology Supplementary Series	agency	CSIRO
Apoidea	Hymenoptera	Hylaeus	Prosopisteron	albozebratus		Valid	Species	Y	Michener	1965	Michener, C.D.	1	no	2014	Michener, C.D. 1965. A classification of the bees of the Australian and South Pacific regions. Bulletin of the American Museum of Natural History 130: 1-362 [Date published 31/12/1965]	Article in Journal	USA	no	Bulletin of the American Museum of Natural History	na	na
Apoidea	Hymenoptera	Hylaeus	Prosopisteron	burnsi		Valid	Species	N	Michener	1965	Michener, C.D.	1	no	2014	Michener, C.D. 1965. A classification of the bees of the Australian and South Pacific regions. Bulletin of the American Museum of Natural History 130: 1-362 [Date published 31/12/1965]	Article in Journal	USA	no	Bulletin of the American Museum of Natural History	na	na
Apoidea	Hymenoptera	Hylaeus	Prosopisteron	simplex		Replaced by Hylaeus (Prosopisteron) simplus Houston, 1993	Species	R	Michener	1965	Michener, C.D.	1	no	2014	Michener, C.D. 1965. A classification of the bees of the Australian and South Pacific regions. Bulletin of the American Museum of Natural History 130: 1-362 [Date published 31/12/1965]	Article in Journal	USA	no	Bulletin of the American Museum of Natural History	na	na
Apoidea	Hymenoptera	Hylaeus	Prosopisteron	turgicollaris		Valid	Species	Y	Michener	1965	Michener, C.D.	1	no	2014	Michener, C.D. 1965. A classification of the bees of the Australian and South Pacific regions. Bulletin of the American Museum of Natural History 130: 1-362 [Date published 31/12/1965]	Article in Journal	USA	no	Bulletin of the American Museum of Natural History	na	na
Apoidea	Hymenoptera	Hylaeus	Pseudhylaeus	multigibbosus		Valid	Species	Y	Michener	1965	Michener, C.D.	1	no	2014	Michener, C.D. 1965. A classification of the bees of the Australian and South Pacific regions. Bulletin of the American Museum of Natural History 130: 1-362 [Date published 31/12/1965]	Article in Journal	USA	no	Bulletin of the American Museum of Natural History	na	na
Apoidea	Hymenoptera	Hylaeus	Sphaerhylaeus	bicolorellus		Valid	Species	Y	Michener	1965	Michener, C.D.	1	no	2014	Michener, C.D. 1965. A classification of the bees of the Australian and South Pacific regions. Bulletin of the American Museum of Natural History 130: 1-362 [Date published 31/12/1965]	Article in Journal	USA	no	Bulletin of the American Museum of Natural History	na	na
Apoidea	Hymenoptera	Hylaeus	Xenohylaeus	desertoris		Valid	Species	Y	Houston	1981	Houston, T.F.	1	no	1336	Houston, T.F. 1981. A revision of the Australian hylaeine bees (Hymenoptera: Colletidae). II. Australian Journal of Zoology Supplementary Series 80: 1-128 [Date published 31/12/1981]	Article in Journal	Australia	no	Australian Journal of Zoology Supplementary Series	agency	CSIRO
Apoidea	Hymenoptera	Hylaeus	Xenohylaeus	rieki		Synonym of Hylaeus (Xenohylaeus) leptospermi Michener, 1965	Species	Y	Michener	1965	Michener, C.D.	1	no	2014	Michener, C.D. 1965. A classification of the bees of the Australian and South Pacific regions. Bulletin of the American Museum of Natural History 130: 1-362 [Date published 31/12/1965]	Article in Journal	USA	no	Bulletin of the American Museum of Natural History	na	na
Apoidea	Hymenoptera	Hylaeus	Xenohylaeus	scutaticornis		Valid	Species	Y	Michener	1965	Michener, C.D.	1	no	2014	Michener, C.D. 1965. A classification of the bees of the Australian and South Pacific regions. Bulletin of the American Museum of Natural History 130: 1-362 [Date published 31/12/1965]	Article in Journal	USA	no	Bulletin of the American Museum of Natural History	na	na
Apoidea	Hymenoptera	Hyleoides		abnormis		Valid	Species	Y	Houston	1975	Houston, T.F.	1	no	1334	Houston, T.F. 1975. A revision of the Australian hylaeine bees (Hymenoptera: Colletidae). I. Australian Journal of Zoology Supplementary Series 36: 1-135 [Date published 31/12/1975]	Article in Journal	Australia	no	Australian Journal of Zoology Supplementary Series	agency	CSIRO
Apoidea	Hymenoptera	Hyleoides		planifrons		Valid	Species	Y	Houston	1975	Houston, T.F.	1	no	1334	Houston, T.F. 1975. A revision of the Australian hylaeine bees (Hymenoptera: Colletidae). I. Australian Journal of Zoology Supplementary Series 36: 1-135 [Date published 31/12/1975]	Article in Journal	Australia	no	Australian Journal of Zoology Supplementary Series	agency	CSIRO
Apoidea	Hymenoptera	Hyphesma		barrowensis		Valid	Species	Y	Exley	1975	Exley, E.M.	1	no	990	Exley, E.M. 1975. Revision of the genus Hyphesma Michener (Apoidea: Colletidae). Australian Journal of Zoology 23: 277-291 [Date published 31/12/1975]	Article in Journal	Australia	no	Australian Journal of Zoology	agency	CSIRO
Apoidea	Hymenoptera	Hyphesma		cardaleae		Valid	Species	Y	Exley	1975	Exley, E.M.	1	no	990	Exley, E.M. 1975. Revision of the genus Hyphesma Michener (Apoidea: Colletidae). Australian Journal of Zoology 23: 277-291 [Date published 31/12/1975]	Article in Journal	Australia	no	Australian Journal of Zoology	agency	CSIRO
Apoidea	Hymenoptera	Hyphesma		cooba		Valid	Species	Y	Exley	1975	Exley, E.M.	1	no	990	Exley, E.M. 1975. Revision of the genus Hyphesma Michener (Apoidea: Colletidae). Australian Journal of Zoology 23: 277-291 [Date published 31/12/1975]	Article in Journal	Australia	no	Australian Journal of Zoology	agency	CSIRO
Apoidea	Hymenoptera	Hyphesma		federalis		Valid	Species	Y	Exley	1975	Exley, E.M.	1	no	990	Exley, E.M. 1975. Revision of the genus Hyphesma Michener (Apoidea: Colletidae). Australian Journal of Zoology 23: 277-291 [Date published 31/12/1975]	Article in Journal	Australia	no	Australian Journal of Zoology	agency	CSIRO
Apoidea	Hymenoptera	Hyphesma		nukarnensis		Valid	Species	Y	Exley	1975	Exley, E.M.	1	no	990	Exley, E.M. 1975. Revision of the genus Hyphesma Michener (Apoidea: Colletidae). Australian Journal of Zoology 23: 277-291 [Date published 31/12/1975]	Article in Journal	Australia	no	Australian Journal of Zoology	agency	CSIRO
Apoidea	Hymenoptera	Isodontia		albata		Valid	Species	Y	Hensen	1991	Hensen, R.V.	1	no	1284	Hensen, R.V. 1991. Notes on Australian Isodontia (Hymenoptera: Sphecidae). Entomologische Berichten 51: 124-127	Article in Journal	Netherlands	yes	Entomologische Berichten	na	na
Apoidea	Hymenoptera	Larrissa		nedymus		Valid	Species	N	Menke	1979	Menke, A.S.	1	no	1996	Menke, A.S. 1979. A review of the genus Larrisson Menke (Hymenoptera: Sphecidae). Australian Journal of Zoology 27: 453-463	Article in Journal	Australia	no	Australian Journal of Zoology	agency	CSIRO
Apoidea	Hymenoptera	Larrisson		azyx		Valid	Species	Y	Menke	1979	Menke, A.S.	1	no	1996	Menke, A.S. 1979. A review of the genus Larrisson Menke (Hymenoptera: Sphecidae). Australian Journal of Zoology 27: 453-463	Article in Journal	Australia	no	Australian Journal of Zoology	agency	CSIRO
Apoidea	Hymenoptera	Larrisson		rieki		Valid	Species	Y	Menke	1979	Menke, A.S.	1	no	1996	Menke, A.S. 1979. A review of the genus Larrisson Menke (Hymenoptera: Sphecidae). Australian Journal of Zoology 27: 453-463	Article in Journal	Australia	no	Australian Journal of Zoology	agency	CSIRO
Apoidea	Hymenoptera	Lasioglossum	Australictus	fulvofasciae		Valid	Species	Y	Michener	1965	Michener, C.D.	1	no	2014	Michener, C.D. 1965. A classification of the bees of the Australian and South Pacific regions. Bulletin of the American Museum of Natural History 130: 1-362 [Date published 31/12/1965]	Article in Journal	USA	no	Bulletin of the American Museum of Natural History	na	na
Apoidea	Hymenoptera	Lasioglossum	Chilalictus	abrophilum		Valid	Species	Y	Walker	1995	Walker, K.	1	no	3171	Walker, K. 1995. Revision of the Australian native bee subgenus Lasioglossum (Chilalictus) (Hymenoptera: Halictidae). Memoirs of Museum Victoria 55: 1-423 [Date published 31/12/95]	Article in Journal	Australia	no	Memoirs of Museum Victoria	museum	MusVic
Apoidea	Hymenoptera	Lasioglossum	Chilalictus	adustum		Valid	Species	Y	Walker	1995	Walker, K.	1	no	3171	Walker, K. 1995. Revision of the Australian native bee subgenus Lasioglossum (Chilalictus) (Hymenoptera: Halictidae). Memoirs of Museum Victoria 55: 1-423 [Date published 31/12/95]	Article in Journal	Australia	no	Memoirs of Museum Victoria	museum	MusVic
Apoidea	Hymenoptera	Lasioglossum	Chilalictus	alacarinatum		Valid	Species	Y	Walker	1995	Walker, K.	1	no	3171	Walker, K. 1995. Revision of the Australian native bee subgenus Lasioglossum (Chilalictus) (Hymenoptera: Halictidae). Memoirs of Museum Victoria 55: 1-423 [Date published 31/12/95]	Article in Journal	Australia	no	Memoirs of Museum Victoria	museum	MusVic
Apoidea	Hymenoptera	Lasioglossum	Chilalictus	albopilosum		Valid	Species	Y	Walker	1995	Walker, K.	1	no	3171	Walker, K. 1995. Revision of the Australian native bee subgenus Lasioglossum (Chilalictus) (Hymenoptera: Halictidae). Memoirs of Museum Victoria 55: 1-423 [Date published 31/12/95]	Article in Journal	Australia	no	Memoirs of Museum Victoria	museum	MusVic
Apoidea	Hymenoptera	Lasioglossum	Chilalictus	alpinum		Valid	Species	Y	Walker	1995	Walker, K.	1	no	3171	Walker, K. 1995. Revision of the Australian native bee subgenus Lasioglossum (Chilalictus) (Hymenoptera: Halictidae). Memoirs of Museum Victoria 55: 1-423 [Date published 31/12/95]	Article in Journal	Australia	no	Memoirs of Museum Victoria	museum	MusVic
Apoidea	Hymenoptera	Lasioglossum	Chilalictus	amboquestrum		Valid	Species	Y	Walker	1995	Walker, K.	1	no	3171	Walker, K. 1995. Revision of the Australian native bee subgenus Lasioglossum (Chilalictus) (Hymenoptera: Halictidae). Memoirs of Museum Victoria 55: 1-423 [Date published 31/12/95]	Article in Journal	Australia	no	Memoirs of Museum Victoria	museum	MusVic
Apoidea	Hymenoptera	Lasioglossum	Chilalictus	amplexum		Valid	Species	Y	Walker	1995	Walker, K.	1	no	3171	Walker, K. 1995. Revision of the Australian native bee subgenus Lasioglossum (Chilalictus) (Hymenoptera: Halictidae). Memoirs of Museum Victoria 55: 1-423 [Date published 31/12/95]	Article in Journal	Australia	no	Memoirs of Museum Victoria	museum	MusVic
Apoidea	Hymenoptera	Lasioglossum	Chilalictus	anforticornum		Valid	Species	Y	Walker	1995	Walker, K.	1	no	3171	Walker, K. 1995. Revision of the Australian native bee subgenus Lasioglossum (Chilalictus) (Hymenoptera: Halictidae). Memoirs of Museum Victoria 55: 1-423 [Date published 31/12/95]	Article in Journal	Australia	no	Memoirs of Museum Victoria	museum	MusVic
Apoidea	Hymenoptera	Lasioglossum	Chilalictus	aquilonium		Valid	Species	Y	Walker	1995	Walker, K.	1	no	3171	Walker, K. 1995. Revision of the Australian native bee subgenus Lasioglossum (Chilalictus) (Hymenoptera: Halictidae). Memoirs of Museum Victoria 55: 1-423 [Date published 31/12/95]	Article in Journal	Australia	no	Memoirs of Museum Victoria	museum	MusVic
Apoidea	Hymenoptera	Lasioglossum	Chilalictus	argopilatum		Valid	Species	Y	Walker	1995	Walker, K.	1	no	3171	Walker, K. 1995. Revision of the Australian native bee subgenus Lasioglossum (Chilalictus) (Hymenoptera: Halictidae). Memoirs of Museum Victoria 55: 1-423 [Date published 31/12/95]	Article in Journal	Australia	no	Memoirs of Museum Victoria	museum	MusVic
Apoidea	Hymenoptera	Lasioglossum	Chilalictus	aspratulum		Valid	Species	Y	Walker	1995	Walker, K.	1	no	3171	Walker, K. 1995. Revision of the Australian native bee subgenus Lasioglossum (Chilalictus) (Hymenoptera: Halictidae). Memoirs of Museum Victoria 55: 1-423 [Date published 31/12/95]	Article in Journal	Australia	no	Memoirs of Museum Victoria	museum	MusVic
Apoidea	Hymenoptera	Lasioglossum	Chilalictus	athrix		Valid	Species	Y	Walker	1995	Walker, K.	1	no	3171	Walker, K. 1995. Revision of the Australian native bee subgenus Lasioglossum (Chilalictus) (Hymenoptera: Halictidae). Memoirs of Museum Victoria 55: 1-423 [Date published 31/12/95]	Article in Journal	Australia	no	Memoirs of Museum Victoria	museum	MusVic
Apoidea	Hymenoptera	Lasioglossum	Chilalictus	aureopilatum		Valid	Species	Y	Walker	1995	Walker, K.	1	no	3171	Walker, K. 1995. Revision of the Australian native bee subgenus Lasioglossum (Chilalictus) (Hymenoptera: Halictidae). Memoirs of Museum Victoria 55: 1-423 [Date published 31/12/95]	Article in Journal	Australia	no	Memoirs of Museum Victoria	museum	MusVic
Apoidea	Hymenoptera	Lasioglossum	Chilalictus	bibrochum		Valid	Species	Y	Walker	1995	Walker, K.	1	no	3171	Walker, K. 1995. Revision of the Australian native bee subgenus Lasioglossum (Chilalictus) (Hymenoptera: Halictidae). Memoirs of Museum Victoria 55: 1-423 [Date published 31/12/95]	Article in Journal	Australia	no	Memoirs of Museum Victoria	museum	MusVic
Apoidea	Hymenoptera	Lasioglossum	Chilalictus	biceps		Valid	Species	Y	Walker	1995	Walker, K.	1	no	3171	Walker, K. 1995. Revision of the Australian native bee subgenus Lasioglossum (Chilalictus) (Hymenoptera: Halictidae). Memoirs of Museum Victoria 55: 1-423 [Date published 31/12/95]	Article in Journal	Australia	no	Memoirs of Museum Victoria	museum	MusVic
Apoidea	Hymenoptera	Lasioglossum	Chilalictus	bicolor		Valid	Species	Y	Walker	1995	Walker, K.	1	no	3171	Walker, K. 1995. Revision of the Australian native bee subgenus Lasioglossum (Chilalictus) (Hymenoptera: Halictidae). Memoirs of Museum Victoria 55: 1-423 [Date published 31/12/95]	Article in Journal	Australia	no	Memoirs of Museum Victoria	museum	MusVic
Apoidea	Hymenoptera	Lasioglossum	Chilalictus	bidens		Replaced by Lasioglossum (Chilalictus) bidentatulum Walker, 1999	Species	Y	Walker	1995	Walker, K.	1	no	3171	Walker, K. 1995. Revision of the Australian native bee subgenus Lasioglossum (Chilalictus) (Hymenoptera: Halictidae). Memoirs of Museum Victoria 55: 1-423 [Date published 31/12/95]	Article in Journal	Australia	no	Memoirs of Museum Victoria	museum	MusVic
Apoidea	Hymenoptera	Lasioglossum	Chilalictus	brochum		Valid	Species	Y	Walker	1995	Walker, K.	1	no	3171	Walker, K. 1995. Revision of the Australian native bee subgenus Lasioglossum (Chilalictus) (Hymenoptera: Halictidae). Memoirs of Museum Victoria 55: 1-423 [Date published 31/12/95]	Article in Journal	Australia	no	Memoirs of Museum Victoria	museum	MusVic
Apoidea	Hymenoptera	Lasioglossum	Chilalictus	brunnesetum		Valid	Species	Y	Walker	1995	Walker, K.	1	no	3171	Walker, K. 1995. Revision of the Australian native bee subgenus Lasioglossum (Chilalictus) (Hymenoptera: Halictidae). Memoirs of Museum Victoria 55: 1-423 [Date published 31/12/95]	Article in Journal	Australia	no	Memoirs of Museum Victoria	museum	MusVic
Apoidea	Hymenoptera	Lasioglossum	Chilalictus	bubrachium		Valid	Species	Y	Walker	1995	Walker, K.	1	no	3171	Walker, K. 1995. Revision of the Australian native bee subgenus Lasioglossum (Chilalictus) (Hymenoptera: Halictidae). Memoirs of Museum Victoria 55: 1-423 [Date published 31/12/95]	Article in Journal	Australia	no	Memoirs of Museum Victoria	museum	MusVic
Apoidea	Hymenoptera	Lasioglossum	Chilalictus	bucculum		Valid	Species	Y	Walker	1995	Walker, K.	1	no	3171	Walker, K. 1995. Revision of the Australian native bee subgenus Lasioglossum (Chilalictus) (Hymenoptera: Halictidae). Memoirs of Museum Victoria 55: 1-423 [Date published 31/12/95]	Article in Journal	Australia	no	Memoirs of Museum Victoria	museum	MusVic
Apoidea	Hymenoptera	Lasioglossum	Chilalictus	bullatum		Valid	Species	Y	Walker	1995	Walker, K.	1	no	3171	Walker, K. 1995. Revision of the Australian native bee subgenus Lasioglossum (Chilalictus) (Hymenoptera: Halictidae). Memoirs of Museum Victoria 55: 1-423 [Date published 31/12/95]	Article in Journal	Australia	no	Memoirs of Museum Victoria	museum	MusVic
Apoidea	Hymenoptera	Lasioglossum	Chilalictus	caesium		Valid	Species	Y	Walker	1995	Walker, K.	1	no	3171	Walker, K. 1995. Revision of the Australian native bee subgenus Lasioglossum (Chilalictus) (Hymenoptera: Halictidae). Memoirs of Museum Victoria 55: 1-423 [Date published 31/12/95]	Article in Journal	Australia	no	Memoirs of Museum Victoria	museum	MusVic
Apoidea	Hymenoptera	Lasioglossum	Chilalictus	cardaleae		Valid	Species	Y	Walker	1995	Walker, K.	1	no	3171	Walker, K. 1995. Revision of the Australian native bee subgenus Lasioglossum (Chilalictus) (Hymenoptera: Halictidae). Memoirs of Museum Victoria 55: 1-423 [Date published 31/12/95]	Article in Journal	Australia	no	Memoirs of Museum Victoria	museum	MusVic
Apoidea	Hymenoptera	Lasioglossum	Chilalictus	carpobrotum		Valid	Species	Y	Walker	1995	Walker, K.	1	no	3171	Walker, K. 1995. Revision of the Australian native bee subgenus Lasioglossum (Chilalictus) (Hymenoptera: Halictidae). Memoirs of Museum Victoria 55: 1-423 [Date published 31/12/95]	Article in Journal	Australia	no	Memoirs of Museum Victoria	museum	MusVic
Apoidea	Hymenoptera	Lasioglossum	Chilalictus	castor		Valid	Species	Y	Walker	1995	Walker, K.	1	no	3171	Walker, K. 1995. Revision of the Australian native bee subgenus Lasioglossum (Chilalictus) (Hymenoptera: Halictidae). Memoirs of Museum Victoria 55: 1-423 [Date published 31/12/95]	Article in Journal	Australia	no	Memoirs of Museum Victoria	museum	MusVic
Apoidea	Hymenoptera	Lasioglossum	Chilalictus	cephalochilum		Valid	Species	Y	Michener	1965	Michener, C.D.	1	no	2014	Michener, C.D. 1965. A classification of the bees of the Australian and South Pacific regions. Bulletin of the American Museum of Natural History 130: 1-362 [Date published 31/12/1965]	Article in Journal	USA	no	Bulletin of the American Museum of Natural History	na	na
Apoidea	Hymenoptera	Lasioglossum	Chilalictus	clypeatum		Valid	Species	Y	Walker	1995	Walker, K.	1	no	3171	Walker, K. 1995. Revision of the Australian native bee subgenus Lasioglossum (Chilalictus) (Hymenoptera: Halictidae). Memoirs of Museum Victoria 55: 1-423 [Date published 31/12/95]	Article in Journal	Australia	no	Memoirs of Museum Victoria	museum	MusVic
Apoidea	Hymenoptera	Lasioglossum	Chilalictus	copleyense		Valid	Species	Y	Walker	1995	Walker, K.	1	no	3171	Walker, K. 1995. Revision of the Australian native bee subgenus Lasioglossum (Chilalictus) (Hymenoptera: Halictidae). Memoirs of Museum Victoria 55: 1-423 [Date published 31/12/95]	Article in Journal	Australia	no	Memoirs of Museum Victoria	museum	MusVic
Apoidea	Hymenoptera	Lasioglossum	Chilalictus	demicapillum		Valid	Species	Y	Walker	1995	Walker, K.	1	no	3171	Walker, K. 1995. Revision of the Australian native bee subgenus Lasioglossum (Chilalictus) (Hymenoptera: Halictidae). Memoirs of Museum Victoria 55: 1-423 [Date published 31/12/95]	Article in Journal	Australia	no	Memoirs of Museum Victoria	museum	MusVic
Apoidea	Hymenoptera	Lasioglossum	Chilalictus	ebeneum		Valid	Species	Y	Walker	1995	Walker, K.	1	no	3171	Walker, K. 1995. Revision of the Australian native bee subgenus Lasioglossum (Chilalictus) (Hymenoptera: Halictidae). Memoirs of Museum Victoria 55: 1-423 [Date published 31/12/95]	Article in Journal	Australia	no	Memoirs of Museum Victoria	museum	MusVic
Apoidea	Hymenoptera	Lasioglossum	Chilalictus	edentulatum		Valid	Species	Y	Walker	1995	Walker, K.	1	no	3171	Walker, K. 1995. Revision of the Australian native bee subgenus Lasioglossum (Chilalictus) (Hymenoptera: Halictidae). Memoirs of Museum Victoria 55: 1-423 [Date published 31/12/95]	Article in Journal	Australia	no	Memoirs of Museum Victoria	museum	MusVic
Apoidea	Hymenoptera	Lasioglossum	Chilalictus	eremaean		Valid	Species	Y	Walker	1995	Walker, K.	1	no	3171	Walker, K. 1995. Revision of the Australian native bee subgenus Lasioglossum (Chilalictus) (Hymenoptera: Halictidae). Memoirs of Museum Victoria 55: 1-423 [Date published 31/12/95]	Article in Journal	Australia	no	Memoirs of Museum Victoria	museum	MusVic
Apoidea	Hymenoptera	Lasioglossum	Chilalictus	eremophilum		Valid	Species	Y	Walker	1995	Walker, K.	1	no	3171	Walker, K. 1995. Revision of the Australian native bee subgenus Lasioglossum (Chilalictus) (Hymenoptera: Halictidae). Memoirs of Museum Victoria 55: 1-423 [Date published 31/12/95]	Article in Journal	Australia	no	Memoirs of Museum Victoria	museum	MusVic
Apoidea	Hymenoptera	Lasioglossum	Chilalictus	eurycephalum		Valid	Species	Y	Walker	1995	Walker, K.	1	no	3171	Walker, K. 1995. Revision of the Australian native bee subgenus Lasioglossum (Chilalictus) (Hymenoptera: Halictidae). Memoirs of Museum Victoria 55: 1-423 [Date published 31/12/95]	Article in Journal	Australia	no	Memoirs of Museum Victoria	museum	MusVic
Apoidea	Hymenoptera	Lasioglossum	Chilalictus	falcatum		Valid	Species	Y	Walker	1995	Walker, K.	1	no	3171	Walker, K. 1995. Revision of the Australian native bee subgenus Lasioglossum (Chilalictus) (Hymenoptera: Halictidae). Memoirs of Museum Victoria 55: 1-423 [Date published 31/12/95]	Article in Journal	Australia	no	Memoirs of Museum Victoria	museum	MusVic
Apoidea	Hymenoptera	Lasioglossum	Chilalictus	fasciatum		Valid	Species	Y	Walker	1995	Walker, K.	1	no	3171	Walker, K. 1995. Revision of the Australian native bee subgenus Lasioglossum (Chilalictus) (Hymenoptera: Halictidae). Memoirs of Museum Victoria 55: 1-423 [Date published 31/12/95]	Article in Journal	Australia	no	Memoirs of Museum Victoria	museum	MusVic
Apoidea	Hymenoptera	Lasioglossum	Chilalictus	frankenia		Valid	Species	Y	Walker	1995	Walker, K.	1	no	3171	Walker, K. 1995. Revision of the Australian native bee subgenus Lasioglossum (Chilalictus) (Hymenoptera: Halictidae). Memoirs of Museum Victoria 55: 1-423 [Date published 31/12/95]	Article in Journal	Australia	no	Memoirs of Museum Victoria	museum	MusVic
Apoidea	Hymenoptera	Lasioglossum	Chilalictus	froggatti		Valid	Species	Y	Walker	1995	Walker, K.	1	no	3171	Walker, K. 1995. Revision of the Australian native bee subgenus Lasioglossum (Chilalictus) (Hymenoptera: Halictidae). Memoirs of Museum Victoria 55: 1-423 [Date published 31/12/95]	Article in Journal	Australia	no	Memoirs of Museum Victoria	museum	MusVic
Apoidea	Hymenoptera	Lasioglossum	Chilalictus	grumiculum		Valid	Species	Y	Walker	1995	Walker, K.	1	no	3171	Walker, K. 1995. Revision of the Australian native bee subgenus Lasioglossum (Chilalictus) (Hymenoptera: Halictidae). Memoirs of Museum Victoria 55: 1-423 [Date published 31/12/95]	Article in Journal	Australia	no	Memoirs of Museum Victoria	museum	MusVic
Apoidea	Hymenoptera	Lasioglossum	Chilalictus	gynochilum		Valid	Species	Y	Michener	1965	Michener, C.D.	1	no	2014	Michener, C.D. 1965. A classification of the bees of the Australian and South Pacific regions. Bulletin of the American Museum of Natural History 130: 1-362 [Date published 31/12/1965]	Article in Journal	USA	no	Bulletin of the American Museum of Natural History	na	na
Apoidea	Hymenoptera	Lasioglossum	Chilalictus	hamatum		Valid	Species	Y	Walker	1995	Walker, K.	1	no	3171	Walker, K. 1995. Revision of the Australian native bee subgenus Lasioglossum (Chilalictus) (Hymenoptera: Halictidae). Memoirs of Museum Victoria 55: 1-423 [Date published 31/12/95]	Article in Journal	Australia	no	Memoirs of Museum Victoria	museum	MusVic
Apoidea	Hymenoptera	Lasioglossum	Chilalictus	hapsidum		Valid	Species	Y	Walker	1995	Walker, K.	1	no	3171	Walker, K. 1995. Revision of the Australian native bee subgenus Lasioglossum (Chilalictus) (Hymenoptera: Halictidae). Memoirs of Museum Victoria 55: 1-423 [Date published 31/12/95]	Article in Journal	Australia	no	Memoirs of Museum Victoria	museum	MusVic
Apoidea	Hymenoptera	Lasioglossum	Chilalictus	immaculatum		Valid	Species	Y	Walker	1995	Walker, K.	1	no	3171	Walker, K. 1995. Revision of the Australian native bee subgenus Lasioglossum (Chilalictus) (Hymenoptera: Halictidae). Memoirs of Museum Victoria 55: 1-423 [Date published 31/12/95]	Article in Journal	Australia	no	Memoirs of Museum Victoria	museum	MusVic
Apoidea	Hymenoptera	Lasioglossum	Chilalictus	inflatum		Valid	Species	Y	Walker	1995	Walker, K.	1	no	3171	Walker, K. 1995. Revision of the Australian native bee subgenus Lasioglossum (Chilalictus) (Hymenoptera: Halictidae). Memoirs of Museum Victoria 55: 1-423 [Date published 31/12/95]	Article in Journal	Australia	no	Memoirs of Museum Victoria	museum	MusVic
Apoidea	Hymenoptera	Lasioglossum	Chilalictus	lamellosum		Valid	Species	Y	Walker	1995	Walker, K.	1	no	3171	Walker, K. 1995. Revision of the Australian native bee subgenus Lasioglossum (Chilalictus) (Hymenoptera: Halictidae). Memoirs of Museum Victoria 55: 1-423 [Date published 31/12/95]	Article in Journal	Australia	no	Memoirs of Museum Victoria	museum	MusVic
Apoidea	Hymenoptera	Lasioglossum	Chilalictus	latichilum		Valid	Species	Y	Walker	1995	Walker, K.	1	no	3171	Walker, K. 1995. Revision of the Australian native bee subgenus Lasioglossum (Chilalictus) (Hymenoptera: Halictidae). Memoirs of Museum Victoria 55: 1-423 [Date published 31/12/95]	Article in Journal	Australia	no	Memoirs of Museum Victoria	museum	MusVic
Apoidea	Hymenoptera	Lasioglossum	Chilalictus	lineatum		Valid	Species	Y	Walker	1995	Walker, K.	1	no	3171	Walker, K. 1995. Revision of the Australian native bee subgenus Lasioglossum (Chilalictus) (Hymenoptera: Halictidae). Memoirs of Museum Victoria 55: 1-423 [Date published 31/12/95]	Article in Journal	Australia	no	Memoirs of Museum Victoria	museum	MusVic
Apoidea	Hymenoptera	Lasioglossum	Chilalictus	litovillum		Valid	Species	Y	Walker	1995	Walker, K.	1	no	3171	Walker, K. 1995. Revision of the Australian native bee subgenus Lasioglossum (Chilalictus) (Hymenoptera: Halictidae). Memoirs of Museum Victoria 55: 1-423 [Date published 31/12/95]	Article in Journal	Australia	no	Memoirs of Museum Victoria	museum	MusVic
Apoidea	Hymenoptera	Lasioglossum	Chilalictus	megacephalum		Replaced by Lasioglossum (Chilalictus) platychilum Walker, 1999	Species	Y	Walker	1995	Walker, K.	1	no	3171	Walker, K. 1995. Revision of the Australian native bee subgenus Lasioglossum (Chilalictus) (Hymenoptera: Halictidae). Memoirs of Museum Victoria 55: 1-423 [Date published 31/12/95]	Article in Journal	Australia	no	Memoirs of Museum Victoria	museum	MusVic
Apoidea	Hymenoptera	Lasioglossum	Chilalictus	mesostenoideum		Valid	Species	Y	Walker	1995	Walker, K.	1	no	3171	Walker, K. 1995. Revision of the Australian native bee subgenus Lasioglossum (Chilalictus) (Hymenoptera: Halictidae). Memoirs of Museum Victoria 55: 1-423 [Date published 31/12/95]	Article in Journal	Australia	no	Memoirs of Museum Victoria	museum	MusVic
Apoidea	Hymenoptera	Lasioglossum	Chilalictus	metallicum		Valid	Species	Y	Walker	1995	Walker, K.	1	no	3171	Walker, K. 1995. Revision of the Australian native bee subgenus Lasioglossum (Chilalictus) (Hymenoptera: Halictidae). Memoirs of Museum Victoria 55: 1-423 [Date published 31/12/95]	Article in Journal	Australia	no	Memoirs of Museum Victoria	museum	MusVic
Apoidea	Hymenoptera	Lasioglossum	Chilalictus	mu		Valid	Species	Y	Walker	1995	Walker, K.	1	no	3171	Walker, K. 1995. Revision of the Australian native bee subgenus Lasioglossum (Chilalictus) (Hymenoptera: Halictidae). Memoirs of Museum Victoria 55: 1-423 [Date published 31/12/95]	Article in Journal	Australia	no	Memoirs of Museum Victoria	museum	MusVic
Apoidea	Hymenoptera	Lasioglossum	Chilalictus	nefrens		Valid	Species	Y	Walker	1995	Walker, K.	1	no	3171	Walker, K. 1995. Revision of the Australian native bee subgenus Lasioglossum (Chilalictus) (Hymenoptera: Halictidae). Memoirs of Museum Victoria 55: 1-423 [Date published 31/12/95]	Article in Journal	Australia	no	Memoirs of Museum Victoria	museum	MusVic
Apoidea	Hymenoptera	Lasioglossum	Chilalictus	nitens		Valid	Species	Y	Walker	1995	Walker, K.	1	no	3171	Walker, K. 1995. Revision of the Australian native bee subgenus Lasioglossum (Chilalictus) (Hymenoptera: Halictidae). Memoirs of Museum Victoria 55: 1-423 [Date published 31/12/95]	Article in Journal	Australia	no	Memoirs of Museum Victoria	museum	MusVic
Apoidea	Hymenoptera	Lasioglossum	Chilalictus	obscurissimum		Valid	Species	Y	Michener	1965	Michener, C.D.	1	no	2014	Michener, C.D. 1965. A classification of the bees of the Australian and South Pacific regions. Bulletin of the American Museum of Natural History 130: 1-362 [Date published 31/12/1965]	Article in Journal	USA	no	Bulletin of the American Museum of Natural History	na	na
Apoidea	Hymenoptera	Lasioglossum	Chilalictus	occidens		Replaced by Lasioglossum (Chilalictus) occiduum Walker, 1999	Species	Y	Walker	1995	Walker, K.	1	no	3171	Walker, K. 1995. Revision of the Australian native bee subgenus Lasioglossum (Chilalictus) (Hymenoptera: Halictidae). Memoirs of Museum Victoria 55: 1-423 [Date published 31/12/95]	Article in Journal	Australia	no	Memoirs of Museum Victoria	museum	MusVic
Apoidea	Hymenoptera	Lasioglossum	Chilalictus	ochrochilum		Valid	Species	Y	Walker	1995	Walker, K.	1	no	3171	Walker, K. 1995. Revision of the Australian native bee subgenus Lasioglossum (Chilalictus) (Hymenoptera: Halictidae). Memoirs of Museum Victoria 55: 1-423 [Date published 31/12/95]	Article in Journal	Australia	no	Memoirs of Museum Victoria	museum	MusVic
Apoidea	Hymenoptera	Lasioglossum	Chilalictus	ochroma		Valid	Species	Y	Walker	1995	Walker, K.	1	no	3171	Walker, K. 1995. Revision of the Australian native bee subgenus Lasioglossum (Chilalictus) (Hymenoptera: Halictidae). Memoirs of Museum Victoria 55: 1-423 [Date published 31/12/95]	Article in Journal	Australia	no	Memoirs of Museum Victoria	museum	MusVic
Apoidea	Hymenoptera	Lasioglossum	Chilalictus	pappodum		Valid	Species	Y	Walker	1995	Walker, K.	1	no	3171	Walker, K. 1995. Revision of the Australian native bee subgenus Lasioglossum (Chilalictus) (Hymenoptera: Halictidae). Memoirs of Museum Victoria 55: 1-423 [Date published 31/12/95]	Article in Journal	Australia	no	Memoirs of Museum Victoria	museum	MusVic
Apoidea	Hymenoptera	Lasioglossum	Chilalictus	parasphecodum		Valid	Species	Y	Walker	1995	Walker, K.	1	no	3171	Walker, K. 1995. Revision of the Australian native bee subgenus Lasioglossum (Chilalictus) (Hymenoptera: Halictidae). Memoirs of Museum Victoria 55: 1-423 [Date published 31/12/95]	Article in Journal	Australia	no	Memoirs of Museum Victoria	museum	MusVic
Apoidea	Hymenoptera	Lasioglossum	Chilalictus	pollux		Valid	Species	Y	Walker	1995	Walker, K.	1	no	3171	Walker, K. 1995. Revision of the Australian native bee subgenus Lasioglossum (Chilalictus) (Hymenoptera: Halictidae). Memoirs of Museum Victoria 55: 1-423 [Date published 31/12/95]	Article in Journal	Australia	no	Memoirs of Museum Victoria	museum	MusVic
Apoidea	Hymenoptera	Lasioglossum	Chilalictus	ptyon		Valid	Species	Y	Walker	1995	Walker, K.	1	no	3171	Walker, K. 1995. Revision of the Australian native bee subgenus Lasioglossum (Chilalictus) (Hymenoptera: Halictidae). Memoirs of Museum Victoria 55: 1-423 [Date published 31/12/95]	Article in Journal	Australia	no	Memoirs of Museum Victoria	museum	MusVic
Apoidea	Hymenoptera	Lasioglossum	Chilalictus	quadratum		Valid	Species	Y	Walker	1995	Walker, K.	1	no	3171	Walker, K. 1995. Revision of the Australian native bee subgenus Lasioglossum (Chilalictus) (Hymenoptera: Halictidae). Memoirs of Museum Victoria 55: 1-423 [Date published 31/12/95]	Article in Journal	Australia	no	Memoirs of Museum Victoria	museum	MusVic
Apoidea	Hymenoptera	Lasioglossum	Chilalictus	roddi		Valid	Species	Y	Walker	1995	Walker, K.	1	no	3171	Walker, K. 1995. Revision of the Australian native bee subgenus Lasioglossum (Chilalictus) (Hymenoptera: Halictidae). Memoirs of Museum Victoria 55: 1-423 [Date published 31/12/95]	Article in Journal	Australia	no	Memoirs of Museum Victoria	museum	MusVic
Apoidea	Hymenoptera	Lasioglossum	Chilalictus	sexsetum		Valid	Species	Y	Walker	1995	Walker, K.	1	no	3171	Walker, K. 1995. Revision of the Australian native bee subgenus Lasioglossum (Chilalictus) (Hymenoptera: Halictidae). Memoirs of Museum Victoria 55: 1-423 [Date published 31/12/95]	Article in Journal	Australia	no	Memoirs of Museum Victoria	museum	MusVic
Apoidea	Hymenoptera	Lasioglossum	Chilalictus	smaragdinum		Valid	Species	Y	Walker	1995	Walker, K.	1	no	3171	Walker, K. 1995. Revision of the Australian native bee subgenus Lasioglossum (Chilalictus) (Hymenoptera: Halictidae). Memoirs of Museum Victoria 55: 1-423 [Date published 31/12/95]	Article in Journal	Australia	no	Memoirs of Museum Victoria	museum	MusVic
Apoidea	Hymenoptera	Lasioglossum	Chilalictus	soror		Replaced by Lasioglossum (Chilalictus) sororculum Walker, 1999	Species	Y	Walker	1995	Walker, K.	1	no	3171	Walker, K. 1995. Revision of the Australian native bee subgenus Lasioglossum (Chilalictus) (Hymenoptera: Halictidae). Memoirs of Museum Victoria 55: 1-423 [Date published 31/12/95]	Article in Journal	Australia	no	Memoirs of Museum Victoria	museum	MusVic
Apoidea	Hymenoptera	Lasioglossum	Chilalictus	spatulatum		Valid	Species	Y	Walker	1995	Walker, K.	1	no	3171	Walker, K. 1995. Revision of the Australian native bee subgenus Lasioglossum (Chilalictus) (Hymenoptera: Halictidae). Memoirs of Museum Victoria 55: 1-423 [Date published 31/12/95]	Article in Journal	Australia	no	Memoirs of Museum Victoria	museum	MusVic
Apoidea	Hymenoptera	Lasioglossum	Chilalictus	speculatum		Valid	Species	Y	Walker	1995	Walker, K.	1	no	3171	Walker, K. 1995. Revision of the Australian native bee subgenus Lasioglossum (Chilalictus) (Hymenoptera: Halictidae). Memoirs of Museum Victoria 55: 1-423 [Date published 31/12/95]	Article in Journal	Australia	no	Memoirs of Museum Victoria	museum	MusVic
Apoidea	Hymenoptera	Lasioglossum	Chilalictus	striatum		Replaced by Lasioglossum (Chilalictus) seriatum Walker, 1999	Species	Y	Walker	1995	Walker, K.	1	no	3171	Walker, K. 1995. Revision of the Australian native bee subgenus Lasioglossum (Chilalictus) (Hymenoptera: Halictidae). Memoirs of Museum Victoria 55: 1-423 [Date published 31/12/95]	Article in Journal	Australia	no	Memoirs of Museum Victoria	museum	MusVic
Apoidea	Hymenoptera	Lasioglossum	Chilalictus	teltiri		Valid	Species	Y	Walker	1995	Walker, K.	1	no	3171	Walker, K. 1995. Revision of the Australian native bee subgenus Lasioglossum (Chilalictus) (Hymenoptera: Halictidae). Memoirs of Museum Victoria 55: 1-423 [Date published 31/12/95]	Article in Journal	Australia	no	Memoirs of Museum Victoria	museum	MusVic
Apoidea	Hymenoptera	Lasioglossum	Chilalictus	triangulatum		Valid	Species	Y	Walker	1995	Walker, K.	1	no	3171	Walker, K. 1995. Revision of the Australian native bee subgenus Lasioglossum (Chilalictus) (Hymenoptera: Halictidae). Memoirs of Museum Victoria 55: 1-423 [Date published 31/12/95]	Article in Journal	Australia	no	Memoirs of Museum Victoria	museum	MusVic
Apoidea	Hymenoptera	Lasioglossum	Chilalictus	tridens		Valid	Species	Y	Walker	1995	Walker, K.	1	no	3171	Walker, K. 1995. Revision of the Australian native bee subgenus Lasioglossum (Chilalictus) (Hymenoptera: Halictidae). Memoirs of Museum Victoria 55: 1-423 [Date published 31/12/95]	Article in Journal	Australia	no	Memoirs of Museum Victoria	museum	MusVic
Apoidea	Hymenoptera	Lasioglossum	Chilalictus	uncinatum		Valid	Species	Y	Walker	1995	Walker, K.	1	no	3171	Walker, K. 1995. Revision of the Australian native bee subgenus Lasioglossum (Chilalictus) (Hymenoptera: Halictidae). Memoirs of Museum Victoria 55: 1-423 [Date published 31/12/95]	Article in Journal	Australia	no	Memoirs of Museum Victoria	museum	MusVic
Apoidea	Hymenoptera	Lasioglossum	Chilalictus	wahlenbergiae		Synonym of Lasioglossum (Chilalictus) willsi (Cockerell, 1906)	Species	Y	Michener	1965	Michener, C.D.	1	no	2014	Michener, C.D. 1965. A classification of the bees of the Australian and South Pacific regions. Bulletin of the American Museum of Natural History 130: 1-362 [Date published 31/12/1965]	Article in Journal	USA	no	Bulletin of the American Museum of Natural History	na	na
Apoidea	Hymenoptera	Lasioglossum	Chilalictus	xerophilum		Valid	Species	Y	Walker	1995	Walker, K.	1	no	3171	Walker, K. 1995. Revision of the Australian native bee subgenus Lasioglossum (Chilalictus) (Hymenoptera: Halictidae). Memoirs of Museum Victoria 55: 1-423 [Date published 31/12/95]	Article in Journal	Australia	no	Memoirs of Museum Victoria	museum	MusVic
Apoidea	Hymenoptera	Lasioglossum	Pseudochilalictus	imitator		Valid	Species	Y	Michener	1965	Michener, C.D.	1	no	2014	Michener, C.D. 1965. A classification of the bees of the Australian and South Pacific regions. Bulletin of the American Museum of Natural History 130: 1-362 [Date published 31/12/1965]	Article in Journal	USA	no	Bulletin of the American Museum of Natural History	na	na
Apoidea	Hymenoptera	Leioproctus	Alokocolletes	excubitor		Valid	Species	Y	Houston	1991	Houston, T.F.	1	no	1343	Houston, T.F. 1991. Two new and unusual species of the bee genus Leioproctus Smith (Hymenoptera: Colletidae), with notes on their behaviour. Records of the Western Australian Museum 15: 83-96 [Date published 31/12/1991]	Article in Journal	Australia	no	Records of the Western Australian Museum	museum	WAMus
Apoidea	Hymenoptera	Leioproctus	Andrenopsis	douglasiellus		Valid	Species	Y	Michener	1965	Michener, C.D.	1	no	2014	Michener, C.D. 1965. A classification of the bees of the Australian and South Pacific regions. Bulletin of the American Museum of Natural History 130: 1-362 [Date published 31/12/1965]	Article in Journal	USA	no	Bulletin of the American Museum of Natural History	na	na
Apoidea	Hymenoptera	Leioproctus	Andrenopsis	nigrifrons		Valid	Species	Y	Michener	1965	Michener, C.D.	1	no	2014	Michener, C.D. 1965. A classification of the bees of the Australian and South Pacific regions. Bulletin of the American Museum of Natural History 130: 1-362 [Date published 31/12/1965]	Article in Journal	USA	no	Bulletin of the American Museum of Natural History	na	na
Apoidea	Hymenoptera	Leioproctus	Baeocolletes	calcaratus		Valid	Species	Y	Michener	1965	Michener, C.D.	1	no	2014	Michener, C.D. 1965. A classification of the bees of the Australian and South Pacific regions. Bulletin of the American Museum of Natural History 130: 1-362 [Date published 31/12/1965]	Article in Journal	USA	no	Bulletin of the American Museum of Natural History	na	na
Apoidea	Hymenoptera	Leioproctus	Baeocolletes	mas		Valid	Species	Y	Michener	1965	Michener, C.D.	1	no	2014	Michener, C.D. 1965. A classification of the bees of the Australian and South Pacific regions. Bulletin of the American Museum of Natural History 130: 1-362 [Date published 31/12/1965]	Article in Journal	USA	no	Bulletin of the American Museum of Natural History	na	na
Apoidea	Hymenoptera	Leioproctus	Baeocolletes	minimus		Valid	Species	Y	Michener	1965	Michener, C.D.	1	no	2014	Michener, C.D. 1965. A classification of the bees of the Australian and South Pacific regions. Bulletin of the American Museum of Natural History 130: 1-362 [Date published 31/12/1965]	Article in Journal	USA	no	Bulletin of the American Museum of Natural History	na	na
Apoidea	Hymenoptera	Leioproctus	Ceratocolletes	xanthosus		Valid	Species	Y	Maynard	1993	Maynard, G.V.	1	no	1922	Maynard, G.V. 1993. Revision of Leioproctus (Ceratocolletes) Michener (Hymenoptera: Colletidae). Journal of the Australian Entomological Society 32(4): 313-316 [Date published November]	Article in Journal	Australia	yes	Journal of the Australian Entomological Society	society	AustEntSoc
Apoidea	Hymenoptera	Leioproctus	Cladocerapis	floccosus		Valid	Species	Y	Maynard	1992	Maynard, G.V.	1	no	1921	Maynard, G.V. 1992. Revision of Leioproctus (Cladocerapis) Cockerell (Hymenoptera: Colletidae). Journal of the Australian Entomological Society 31: 1-11 [Date published 31/12/1992]	Article in Journal	Australia	yes	Journal of the Australian Entomological Society	society	AustEntSoc
Apoidea	Hymenoptera	Leioproctus	Cladocerapis	ignicolor		Valid	Species	Y	Maynard	1992	Maynard, G.V.	1	no	1921	Maynard, G.V. 1992. Revision of Leioproctus (Cladocerapis) Cockerell (Hymenoptera: Colletidae). Journal of the Australian Entomological Society 31: 1-11 [Date published 31/12/1992]	Article in Journal	Australia	yes	Journal of the Australian Entomological Society	society	AustEntSoc
Apoidea	Hymenoptera	Leioproctus	Colletopsis	contrarius		Valid	Species	Y	Michener	1965	Michener, C.D.	1	no	2014	Michener, C.D. 1965. A classification of the bees of the Australian and South Pacific regions. Bulletin of the American Museum of Natural History 130: 1-362 [Date published 31/12/1965]	Article in Journal	USA	no	Bulletin of the American Museum of Natural History	na	na
Apoidea	Hymenoptera	Leioproctus	Excolletes	impatellatus		Valid	Species	Y	Michener	1965	Michener, C.D.	1	no	2014	Michener, C.D. 1965. A classification of the bees of the Australian and South Pacific regions. Bulletin of the American Museum of Natural History 130: 1-362 [Date published 31/12/1965]	Article in Journal	USA	no	Bulletin of the American Museum of Natural History	na	na
Apoidea	Hymenoptera	Leioproctus	Filiglossa	davisi		Valid	Species	Y	Maynard	1994	Maynard, G.	1	no	1918	Maynard, G. 1994. Revision of Leioproctus (Filiglossa) Rayment (Hymenoptera: Colletidae). Journal of the Australian Entomological Society 33(3): 299-304 [Date published August]	Article in Journal	Australia	yes	Journal of the Australian Entomological Society	society	AustEntSoc
Apoidea	Hymenoptera	Leioproctus	Filiglossa	hamatus		Valid	Species	Y	Maynard	1994	Maynard, G.	1	no	1918	Maynard, G. 1994. Revision of Leioproctus (Filiglossa) Rayment (Hymenoptera: Colletidae). Journal of the Australian Entomological Society 33(3): 299-304 [Date published August]	Article in Journal	Australia	yes	Journal of the Australian Entomological Society	society	AustEntSoc
Apoidea	Hymenoptera	Leioproctus	Filiglossa	prolatus		Valid	Species	Y	Maynard	1994	Maynard, G.	1	no	1918	Maynard, G. 1994. Revision of Leioproctus (Filiglossa) Rayment (Hymenoptera: Colletidae). Journal of the Australian Entomological Society 33(3): 299-304 [Date published August]	Article in Journal	Australia	yes	Journal of the Australian Entomological Society	society	AustEntSoc
Apoidea	Hymenoptera	Leioproctus	Goniocolletes	dolosus		Synonym of Goniocolletes subdolus (Cockerell, 1913)	Species	Y	Michener	1965	Michener, C.D.	1	no	2014	Michener, C.D. 1965. A classification of the bees of the Australian and South Pacific regions. Bulletin of the American Museum of Natural History 130: 1-362 [Date published 31/12/1965]	Article in Journal	USA	no	Bulletin of the American Museum of Natural History	na	na
Apoidea	Hymenoptera	Leioproctus		idiotropoptera		Valid	Species	Y	Packer	2006	Packer, L.	1	no	2324	Packer, L. 2006. A new Leioproctus with unique wing venation in males (Hymenoptera: Colletidae: Paracolletinae) with comments on unusual wing modifications in bees. Zootaxa 1104: 47-57	Article in Journal	New Zealand	no	Zootaxa	na	na
Apoidea	Hymenoptera	Leioproctus	Leioproctus	canutus		Valid	Species	Y	Houston	1990	Houston, T.F.	1	no	1342	Houston, T.F. 1990. Descriptions of new paracolletine bees associated with flowers of Eremophila (Hymenoptera: Colletidae). Records of the Western Australian Museum 14: 583-621 [Date published 31/12/1990]	Article in Journal	Australia	no	Records of the Western Australian Museum	museum	WAMus
Apoidea	Hymenoptera	Leioproctus	Leioproctus	capito		Valid	Species	Y	Houston	1990	Houston, T.F.	1	no	1342	Houston, T.F. 1990. Descriptions of new paracolletine bees associated with flowers of Eremophila (Hymenoptera: Colletidae). Records of the Western Australian Museum 14: 583-621 [Date published 31/12/1990]	Article in Journal	Australia	no	Records of the Western Australian Museum	museum	WAMus
Apoidea	Hymenoptera	Leioproctus	Leioproctus	concavus		Valid	Species	Y	Houston	1990	Houston, T.F.	1	no	1342	Houston, T.F. 1990. Descriptions of new paracolletine bees associated with flowers of Eremophila (Hymenoptera: Colletidae). Records of the Western Australian Museum 14: 583-621 [Date published 31/12/1990]	Article in Journal	Australia	no	Records of the Western Australian Museum	museum	WAMus
Apoidea	Hymenoptera	Leioproctus	Leioproctus	conospermi		Valid	Species	Y	Houston	1989	Houston, T.F.	1	no	1341	Houston, T.F. 1989. Leioproctus bees associated with Western Australian smoke bushes (Conospermum spp.) and their adaptations for foraging and concealment (Hymenoptera: Colletidae: Paracolletini). Records of the Western Australian Museum 14: 275-292 [Date published 31/12/1989]	Article in Journal	Australia	no	Records of the Western Australian Museum	museum	WAMus
Apoidea	Hymenoptera	Leioproctus	Leioproctus	crenulatus		Valid	Species	Y	Michener	1965	Michener, C.D.	1	no	2014	Michener, C.D. 1965. A classification of the bees of the Australian and South Pacific regions. Bulletin of the American Museum of Natural History 130: 1-362 [Date published 31/12/1965]	Article in Journal	USA	no	Bulletin of the American Museum of Natural History	na	na
Apoidea	Hymenoptera	Leioproctus	Leioproctus	eremites		Valid	Species	Y	Houston	1990	Houston, T.F.	1	no	1342	Houston, T.F. 1990. Descriptions of new paracolletine bees associated with flowers of Eremophila (Hymenoptera: Colletidae). Records of the Western Australian Museum 14: 583-621 [Date published 31/12/1990]	Article in Journal	Australia	no	Records of the Western Australian Museum	museum	WAMus
Apoidea	Hymenoptera	Leioproctus	Leioproctus	eremitulus		Valid	Species	Y	Houston	1990	Houston, T.F.	1	no	1342	Houston, T.F. 1990. Descriptions of new paracolletine bees associated with flowers of Eremophila (Hymenoptera: Colletidae). Records of the Western Australian Museum 14: 583-621 [Date published 31/12/1990]	Article in Journal	Australia	no	Records of the Western Australian Museum	museum	WAMus
Apoidea	Hymenoptera	Leioproctus	Leioproctus	kumarina		Valid	Species	Y	Houston	1990	Houston, T.F.	1	no	1342	Houston, T.F. 1990. Descriptions of new paracolletine bees associated with flowers of Eremophila (Hymenoptera: Colletidae). Records of the Western Australian Museum 14: 583-621 [Date published 31/12/1990]	Article in Journal	Australia	no	Records of the Western Australian Museum	museum	WAMus
Apoidea	Hymenoptera	Leioproctus	Leioproctus	lanceolatus		Valid	Species	Y	Houston	1990	Houston, T.F.	1	no	1342	Houston, T.F. 1990. Descriptions of new paracolletine bees associated with flowers of Eremophila (Hymenoptera: Colletidae). Records of the Western Australian Museum 14: 583-621 [Date published 31/12/1990]	Article in Journal	Australia	no	Records of the Western Australian Museum	museum	WAMus
Apoidea	Hymenoptera	Leioproctus	Leioproctus	longipalpus		Valid	Species	Y	Houston	1990	Houston, T.F.	1	no	1342	Houston, T.F. 1990. Descriptions of new paracolletine bees associated with flowers of Eremophila (Hymenoptera: Colletidae). Records of the Western Australian Museum 14: 583-621 [Date published 31/12/1990]	Article in Journal	Australia	no	Records of the Western Australian Museum	museum	WAMus
Apoidea	Hymenoptera	Leioproctus	Leioproctus	lucanus		Valid	Species	Y	Houston	1990	Houston, T.F.	1	no	1342	Houston, T.F. 1990. Descriptions of new paracolletine bees associated with flowers of Eremophila (Hymenoptera: Colletidae). Records of the Western Australian Museum 14: 583-621 [Date published 31/12/1990]	Article in Journal	Australia	no	Records of the Western Australian Museum	museum	WAMus
Apoidea	Hymenoptera	Leioproctus	Leioproctus	lucidicinctus		Valid	Species	Y	Houston	1990	Houston, T.F.	1	no	1342	Houston, T.F. 1990. Descriptions of new paracolletine bees associated with flowers of Eremophila (Hymenoptera: Colletidae). Records of the Western Australian Museum 14: 583-621 [Date published 31/12/1990]	Article in Journal	Australia	no	Records of the Western Australian Museum	museum	WAMus
Apoidea	Hymenoptera	Leioproctus	Leioproctus	macmillani		Valid	Species	Y	Houston	1991	Houston, T.F.	1	no	1343	Houston, T.F. 1991. Two new and unusual species of the bee genus Leioproctus Smith (Hymenoptera: Colletidae), with notes on their behaviour. Records of the Western Australian Museum 15: 83-96 [Date published 31/12/1991]	Article in Journal	Australia	no	Records of the Western Australian Museum	museum	WAMus
Apoidea	Hymenoptera	Leioproctus	Leioproctus	megachalcoides		Valid	Species	Y	Michener	1965	Michener, C.D.	1	no	2014	Michener, C.D. 1965. A classification of the bees of the Australian and South Pacific regions. Bulletin of the American Museum of Natural History 130: 1-362 [Date published 31/12/1965]	Article in Journal	USA	no	Bulletin of the American Museum of Natural History	na	na
Apoidea	Hymenoptera	Leioproctus	Leioproctus	nasutus		Valid	Species	Y	Houston	1990	Houston, T.F.	1	no	1342	Houston, T.F. 1990. Descriptions of new paracolletine bees associated with flowers of Eremophila (Hymenoptera: Colletidae). Records of the Western Australian Museum 14: 583-621 [Date published 31/12/1990]	Article in Journal	Australia	no	Records of the Western Australian Museum	museum	WAMus
Apoidea	Hymenoptera	Leioproctus	Leioproctus	pappus		Valid	Species	Y	Houston	1989	Houston, T.F.	1	no	1341	Houston, T.F. 1989. Leioproctus bees associated with Western Australian smoke bushes (Conospermum spp.) and their adaptations for foraging and concealment (Hymenoptera: Colletidae: Paracolletini). Records of the Western Australian Museum 14: 275-292 [Date published 31/12/1989]	Article in Journal	Australia	no	Records of the Western Australian Museum	museum	WAMus
Apoidea	Hymenoptera	Leioproctus	Leioproctus	tomentosus		Valid	Species	Y	Houston	1989	Houston, T.F.	1	no	1341	Houston, T.F. 1989. Leioproctus bees associated with Western Australian smoke bushes (Conospermum spp.) and their adaptations for foraging and concealment (Hymenoptera: Colletidae: Paracolletini). Records of the Western Australian Museum 14: 275-292 [Date published 31/12/1989]	Article in Journal	Australia	no	Records of the Western Australian Museum	museum	WAMus
Apoidea	Hymenoptera	Leioproctus	Leioproctus	unguidentatus		Synonym of Leioproctus (Leioproctus) cyaneorufus (Cockerell, 1930)	Species	Y	Michener	1965	Michener, C.D.	1	no	2014	Michener, C.D. 1965. A classification of the bees of the Australian and South Pacific regions. Bulletin of the American Museum of Natural History 130: 1-362 [Date published 31/12/1965]	Article in Journal	USA	no	Bulletin of the American Museum of Natural History	na	na
Apoidea	Hymenoptera	Leioproctus	Minycolletes	finkei		Valid	Species	Y	Michener	1965	Michener, C.D.	1	no	2014	Michener, C.D. 1965. A classification of the bees of the Australian and South Pacific regions. Bulletin of the American Museum of Natural History 130: 1-362 [Date published 31/12/1965]	Article in Journal	USA	no	Bulletin of the American Museum of Natural History	na	na
Apoidea	Hymenoptera	Leioproctus	Minycolletes	microsomus		Valid	Species	Y	Michener	1965	Michener, C.D.	1	no	2014	Michener, C.D. 1965. A classification of the bees of the Australian and South Pacific regions. Bulletin of the American Museum of Natural History 130: 1-362 [Date published 31/12/1965]	Article in Journal	USA	no	Bulletin of the American Museum of Natural History	na	na
Apoidea	Hymenoptera	Leioproctus	Minycolletes	wahlenbergiae		Valid	Species	Y	Michener	1965	Michener, C.D.	1	no	2014	Michener, C.D. 1965. A classification of the bees of the Australian and South Pacific regions. Bulletin of the American Museum of Natural History 130: 1-362 [Date published 31/12/1965]	Article in Journal	USA	no	Bulletin of the American Museum of Natural History	na	na
Apoidea	Hymenoptera	Leioproctus	Odontocolletes	asper		Valid	Species	Y	Maynard	1997	Maynard, G.V.	1	no	1923	Maynard, G.V. 1997. Revision of Leioproctus (Anacolletes) Michener and description of a new subgenus Leioproctus (Odontocolletes) (Hymenoptera: Colletidae). Australian Journal of Entomology 36(2): 137-148	Article in Journal	Australia	yes	Australian Journal of Entomology	society	AustEntSoc
Apoidea	Hymenoptera	Leioproctus	Odontocolletes	cardaleae		Valid	Species	Y	Maynard	1997	Maynard, G.V.	1	no	1923	Maynard, G.V. 1997. Revision of Leioproctus (Anacolletes) Michener and description of a new subgenus Leioproctus (Odontocolletes) (Hymenoptera: Colletidae). Australian Journal of Entomology 36(2): 137-148	Article in Journal	Australia	yes	Australian Journal of Entomology	society	AustEntSoc
Apoidea	Hymenoptera	Leioproctus	Odontocolletes	erythropyga		Valid	Species	Y	Maynard	1997	Maynard, G.V.	1	no	1923	Maynard, G.V. 1997. Revision of Leioproctus (Anacolletes) Michener and description of a new subgenus Leioproctus (Odontocolletes) (Hymenoptera: Colletidae). Australian Journal of Entomology 36(2): 137-148	Article in Journal	Australia	yes	Australian Journal of Entomology	society	AustEntSoc
Apoidea	Hymenoptera	Leioproctus	Odontocolletes	xanthozoster		Valid	Species	Y	Maynard	1997	Maynard, G.V.	1	no	1923	Maynard, G.V. 1997. Revision of Leioproctus (Anacolletes) Michener and description of a new subgenus Leioproctus (Odontocolletes) (Hymenoptera: Colletidae). Australian Journal of Entomology 36(2): 137-148	Article in Journal	Australia	yes	Australian Journal of Entomology	society	AustEntSoc
Apoidea	Hymenoptera	Leioproctus	Protomorpha	alloeopus		Valid	Species	Y	Maynard	1991	Maynard, G.V.	1	no	1920	Maynard, G.V. 1991. Revision of Leioproctus (Protomorpha) Rayment (Hymenoptera: Colletidae) with description of two new species. Journal of the Australian Entomological Society 30: 67-75 [Date published 31/12/1991]	Article in Journal	Australia	yes	Journal of the Australian Entomological Society	society	AustEntSoc
Apoidea	Hymenoptera	Leioproctus	Protomorpha	plautus		Valid	Species	Y	Maynard	1991	Maynard, G.V.	1	no	1920	Maynard, G.V. 1991. Revision of Leioproctus (Protomorpha) Rayment (Hymenoptera: Colletidae) with description of two new species. Journal of the Australian Entomological Society 30: 67-75 [Date published 31/12/1991]	Article in Journal	Australia	yes	Journal of the Australian Entomological Society	society	AustEntSoc
Apoidea	Hymenoptera	Leioproctus	Urocolletes	rhodurus		Valid	Species	Y	Michener	1965	Michener, C.D.	1	no	2014	Michener, C.D. 1965. A classification of the bees of the Australian and South Pacific regions. Bulletin of the American Museum of Natural History 130: 1-362 [Date published 31/12/1965]	Article in Journal	USA	no	Bulletin of the American Museum of Natural History	na	na
Apoidea	Hymenoptera	Megachile	Callomegachile	mystaceana		Valid	Species	N	Michener	1962	Michener, C.D.	1	no	2012	Michener, C.D. 1962. Observations on the classification of the bees commonly placed in the genus Megachile (Hymenoptera: Apoidea). Journal of the New York Entomological Society 70: 17-29 [Date published 31/12/1962]	Article in Journal	USA	yes	Journal of the New York Entomological Society	na	na
Apoidea	Hymenoptera	Megachile	Hackeriapis	adusta		Valid	Species	N	King	1994	King, J.	1	no	1520	King, J. 1994. The bee family Megachilidae (Hymenoptera: Apoidea) in Australia. I. Morphology of the genus Chalicodoma Lepeletier, and a revision of the subgenus Hackeriapis Cockerell. Invertebrate Taxonomy 8(6): 1373-1419	Article in Journal	Australia	no	Invertebrate Taxonomy	agency	CSIRO
Apoidea	Hymenoptera	Megachile	Hackeriapis	bicornis		Valid	Species	N	King	1994	King, J.	1	no	1520	King, J. 1994. The bee family Megachilidae (Hymenoptera: Apoidea) in Australia. I. Morphology of the genus Chalicodoma Lepeletier, and a revision of the subgenus Hackeriapis Cockerell. Invertebrate Taxonomy 8(6): 1373-1419	Article in Journal	Australia	no	Invertebrate Taxonomy	agency	CSIRO
Apoidea	Hymenoptera	Megachile	Hackeriapis	ebenea		Valid	Species	N	King	1994	King, J.	1	no	1520	King, J. 1994. The bee family Megachilidae (Hymenoptera: Apoidea) in Australia. I. Morphology of the genus Chalicodoma Lepeletier, and a revision of the subgenus Hackeriapis Cockerell. Invertebrate Taxonomy 8(6): 1373-1419	Article in Journal	Australia	no	Invertebrate Taxonomy	agency	CSIRO
Apoidea	Hymenoptera	Megachile	Hackeriapis	emexae		Valid	Species	N	King	1994	King, J.	1	no	1520	King, J. 1994. The bee family Megachilidae (Hymenoptera: Apoidea) in Australia. I. Morphology of the genus Chalicodoma Lepeletier, and a revision of the subgenus Hackeriapis Cockerell. Invertebrate Taxonomy 8(6): 1373-1419	Article in Journal	Australia	no	Invertebrate Taxonomy	agency	CSIRO
Apoidea	Hymenoptera	Megachile	Hackeriapis	kakadui		Valid	Species	N	King	1994	King, J.	1	no	1520	King, J. 1994. The bee family Megachilidae (Hymenoptera: Apoidea) in Australia. I. Morphology of the genus Chalicodoma Lepeletier, and a revision of the subgenus Hackeriapis Cockerell. Invertebrate Taxonomy 8(6): 1373-1419	Article in Journal	Australia	no	Invertebrate Taxonomy	agency	CSIRO
Apoidea	Hymenoptera	Megachile	Hackeriapis	kununurrensis		Valid	Species	N	King	1994	King, J.	1	no	1520	King, J. 1994. The bee family Megachilidae (Hymenoptera: Apoidea) in Australia. I. Morphology of the genus Chalicodoma Lepeletier, and a revision of the subgenus Hackeriapis Cockerell. Invertebrate Taxonomy 8(6): 1373-1419	Article in Journal	Australia	no	Invertebrate Taxonomy	agency	CSIRO
Apoidea	Hymenoptera	Megachile	Hackeriapis	patera		Valid	Species	N	King	1994	King, J.	1	no	1520	King, J. 1994. The bee family Megachilidae (Hymenoptera: Apoidea) in Australia. I. Morphology of the genus Chalicodoma Lepeletier, and a revision of the subgenus Hackeriapis Cockerell. Invertebrate Taxonomy 8(6): 1373-1419	Article in Journal	Australia	no	Invertebrate Taxonomy	agency	CSIRO
Apoidea	Hymenoptera	Megachile	Hackeriapis	variabilis		Valid	Species	N	King	1994	King, J.	1	no	1520	King, J. 1994. The bee family Megachilidae (Hymenoptera: Apoidea) in Australia. I. Morphology of the genus Chalicodoma Lepeletier, and a revision of the subgenus Hackeriapis Cockerell. Invertebrate Taxonomy 8(6): 1373-1419	Article in Journal	Australia	no	Invertebrate Taxonomy	agency	CSIRO
Apoidea	Hymenoptera	Megachile	Rhodomegachile	ferruginea		Valid	Species	N	King & Exley	1985	King, J. & Exley, E.M.	2	no	1521	King, J. & Exley, E.M. 1985. A revision of Chalicodoma (Rhodomegachile) Michener (Hymenoptera: Megachilidae). Journal of the Australian Entomological Society 24: 199-204 [Date published 31/12/1985]	Article in Journal	Australia	yes	Journal of the Australian Entomological Society	society	AustEntSoc
Apoidea	Hymenoptera	Meroglossa		ferruginea		Valid	Species	Y	Houston	1975	Houston, T.F.	1	no	1334	Houston, T.F. 1975. A revision of the Australian hylaeine bees (Hymenoptera: Colletidae). I. Australian Journal of Zoology Supplementary Series 36: 1-135 [Date published 31/12/1975]	Article in Journal	Australia	no	Australian Journal of Zoology Supplementary Series	agency	CSIRO
Apoidea	Hymenoptera	Meroglossa		gemmata		Valid	Species	Y	Houston	1975	Houston, T.F.	1	no	1334	Houston, T.F. 1975. A revision of the Australian hylaeine bees (Hymenoptera: Colletidae). I. Australian Journal of Zoology Supplementary Series 36: 1-135 [Date published 31/12/1975]	Article in Journal	Australia	no	Australian Journal of Zoology Supplementary Series	agency	CSIRO
Apoidea	Hymenoptera	Meroglossa		modesta		Valid	Species	Y	Houston	1975	Houston, T.F.	1	no	1334	Houston, T.F. 1975. A revision of the Australian hylaeine bees (Hymenoptera: Colletidae). I. Australian Journal of Zoology Supplementary Series 36: 1-135 [Date published 31/12/1975]	Article in Journal	Australia	no	Australian Journal of Zoology Supplementary Series	agency	CSIRO
Apoidea	Hymenoptera	Meroglossa		ocellata		Valid	Species	Y	Michener	1965	Michener, C.D.	1	no	2014	Michener, C.D. 1965. A classification of the bees of the Australian and South Pacific regions. Bulletin of the American Museum of Natural History 130: 1-362 [Date published 31/12/1965]	Article in Journal	USA	no	Bulletin of the American Museum of Natural History	na	na
Apoidea	Hymenoptera	Meroglossa		plumifera		Valid	Species	Y	Houston	1975	Houston, T.F.	1	no	1334	Houston, T.F. 1975. A revision of the Australian hylaeine bees (Hymenoptera: Colletidae). I. Australian Journal of Zoology Supplementary Series 36: 1-135 [Date published 31/12/1975]	Article in Journal	Australia	no	Australian Journal of Zoology Supplementary Series	agency	CSIRO
Apoidea	Hymenoptera	Meroglossa		rugosa		Valid	Species	Y	Houston	1975	Houston, T.F.	1	no	1334	Houston, T.F. 1975. A revision of the Australian hylaeine bees (Hymenoptera: Colletidae). I. Australian Journal of Zoology Supplementary Series 36: 1-135 [Date published 31/12/1975]	Article in Journal	Australia	no	Australian Journal of Zoology Supplementary Series	agency	CSIRO
Apoidea	Hymenoptera	Meroglossa		setifera		Valid	Species	Y	Houston	1975	Houston, T.F.	1	no	1334	Houston, T.F. 1975. A revision of the Australian hylaeine bees (Hymenoptera: Colletidae). I. Australian Journal of Zoology Supplementary Series 36: 1-135 [Date published 31/12/1975]	Article in Journal	Australia	no	Australian Journal of Zoology Supplementary Series	agency	CSIRO
Apoidea	Hymenoptera	Neopasiphae		simplicior		Valid	Species	Y	Michener	1965	Michener, C.D.	1	no	2014	Michener, C.D. 1965. A classification of the bees of the Australian and South Pacific regions. Bulletin of the American Museum of Natural History 130: 1-362 [Date published 31/12/1965]	Article in Journal	USA	no	Bulletin of the American Museum of Natural History	na	na
Apoidea	Hymenoptera	Nitela		elegans		Valid	Species	Y	Matthews	2000	Matthews, R.W.	1	no	1911	Matthews, R.W. 2000. A new species of Nitela (Hymenoptera: Sphecidae: Larrinae) from Australia with notes on the nests and prey of two species. Journal of Hymenoptera Research 9(1): 41-47	Article in Journal	USA	yes	Journal of Hymenoptera Research	na	na
Apoidea	Hymenoptera	Notocrabro		micheneri		Valid	Species	Y	Leclercq	1974	Leclercq, J.	1	no	1714	Leclercq, J. 1974. Crabroniens d'Australie (Hymenoptera Sphecidae and Crabroninae). Bulletin et Annales de la Société Royale Belgique d'Entomologie 110: 37-57	Article in Journal	Belgium	yes	Bulletin et Annales de la Société Royale Belgique d'Entomologie	na	na
Apoidea	Hymenoptera	Pachyprosopis	Pachyprosopis	cornuta		Valid	Species	Y	Exley	1972	Exley, E.M.	1	no	985	Exley, E.M. 1972. Revision of the genus Pachyprosopis Perkins (Apoidea: Colletidae). Australian Journal of Zoology Supplementary Series 10: 1-43 [Date published 31/12/1972]	Article in Journal	Australia	no	Australian Journal of Zoology Supplementary Series	agency	CSIRO
Apoidea	Hymenoptera	Pachyprosopis	Pachyprosopis	psilosomata		Valid	Species	Y	Exley	1972	Exley, E.M.	1	no	985	Exley, E.M. 1972. Revision of the genus Pachyprosopis Perkins (Apoidea: Colletidae). Australian Journal of Zoology Supplementary Series 10: 1-43 [Date published 31/12/1972]	Article in Journal	Australia	no	Australian Journal of Zoology Supplementary Series	agency	CSIRO
Apoidea	Hymenoptera	Pachyprosopis	Pachyprosopula	flava		Valid	Species	Y	Exley	1976	Exley, E.M.	1	no	992	Exley, E.M. 1976. New species and records of Pachyprosopis Perkins (Apoidea: Colletidae: Euryglossinae). Journal of the Australian Entomological Society 14: 399-407 [Date published 31/12/1976]	Article in Journal	Australia	yes	Journal of the Australian Entomological Society	society	AustEntSoc
Apoidea	Hymenoptera	Pachyprosopis	Pachyprosopula	kununurra		Valid	Species	Y	Exley	1976	Exley, E.M.	1	no	992	Exley, E.M. 1976. New species and records of Pachyprosopis Perkins (Apoidea: Colletidae: Euryglossinae). Journal of the Australian Entomological Society 14: 399-407 [Date published 31/12/1976]	Article in Journal	Australia	yes	Journal of the Australian Entomological Society	society	AustEntSoc
Apoidea	Hymenoptera	Pachyprosopis	Pachyprosopula	trichopoda		Valid	Species	Y	Exley	1972	Exley, E.M.	1	no	985	Exley, E.M. 1972. Revision of the genus Pachyprosopis Perkins (Apoidea: Colletidae). Australian Journal of Zoology Supplementary Series 10: 1-43 [Date published 31/12/1972]	Article in Journal	Australia	no	Australian Journal of Zoology Supplementary Series	agency	CSIRO
Apoidea	Hymenoptera	Pachyprosopis	Parapachyprosopis	eucalypti		Valid	Species	Y	Exley	1972	Exley, E.M.	1	no	985	Exley, E.M. 1972. Revision of the genus Pachyprosopis Perkins (Apoidea: Colletidae). Australian Journal of Zoology Supplementary Series 10: 1-43 [Date published 31/12/1972]	Article in Journal	Australia	no	Australian Journal of Zoology Supplementary Series	agency	CSIRO
Apoidea	Hymenoptera	Pachyprosopis	Parapachyprosopis	eucyrta		Valid	Species	Y	Exley	1972	Exley, E.M.	1	no	985	Exley, E.M. 1972. Revision of the genus Pachyprosopis Perkins (Apoidea: Colletidae). Australian Journal of Zoology Supplementary Series 10: 1-43 [Date published 31/12/1972]	Article in Journal	Australia	no	Australian Journal of Zoology Supplementary Series	agency	CSIRO
Apoidea	Hymenoptera	Pachyprosopis	Parapachyprosopis	grossoscapus		Valid	Species	Y	Exley	1976	Exley, E.M.	1	no	992	Exley, E.M. 1976. New species and records of Pachyprosopis Perkins (Apoidea: Colletidae: Euryglossinae). Journal of the Australian Entomological Society 14: 399-407 [Date published 31/12/1976]	Article in Journal	Australia	yes	Journal of the Australian Entomological Society	society	AustEntSoc
Apoidea	Hymenoptera	Pachyprosopis	Parapachyprosopis	melanognathus		Valid	Species	Y	Exley	1976	Exley, E.M.	1	no	992	Exley, E.M. 1976. New species and records of Pachyprosopis Perkins (Apoidea: Colletidae: Euryglossinae). Journal of the Australian Entomological Society 14: 399-407 [Date published 31/12/1976]	Article in Journal	Australia	yes	Journal of the Australian Entomological Society	society	AustEntSoc
Apoidea	Hymenoptera	Pachyprosopis	Parapachyprosopis	sternotricha		Valid	Species	Y	Exley	1972	Exley, E.M.	1	no	985	Exley, E.M. 1972. Revision of the genus Pachyprosopis Perkins (Apoidea: Colletidae). Australian Journal of Zoology Supplementary Series 10: 1-43 [Date published 31/12/1972]	Article in Journal	Australia	no	Australian Journal of Zoology Supplementary Series	agency	CSIRO
Apoidea	Hymenoptera	Pachyprosopis	Parapachyprosopis	xanthometopa		Valid	Species	Y	Exley	1972	Exley, E.M.	1	no	985	Exley, E.M. 1972. Revision of the genus Pachyprosopis Perkins (Apoidea: Colletidae). Australian Journal of Zoology Supplementary Series 10: 1-43 [Date published 31/12/1972]	Article in Journal	Australia	no	Australian Journal of Zoology Supplementary Series	agency	CSIRO
Apoidea	Hymenoptera	Palaeorhiza	Anchirhiza	mandibularis		Valid	Species	Y	Michener	1965	Michener, C.D.	1	no	2014	Michener, C.D. 1965. A classification of the bees of the Australian and South Pacific regions. Bulletin of the American Museum of Natural History 130: 1-362 [Date published 31/12/1965]	Article in Journal	USA	no	Bulletin of the American Museum of Natural History	na	na
Apoidea	Hymenoptera	Patellapis	Pachyhalictus	albipilatus		Valid	Species	N	Walker	1996	Walker, K.	1	no	3172	Walker, K. 1996. A new species of Australian Pachyhalictus Cockerell (Hymenoptera: Halictidae). Australian Entomologist 23(4): 125-131 [Date published December]	Article in Journal	Australia	yes	Australian Entomologist	society	EntSocQld
Apoidea	Hymenoptera	Pison		areniferum		Valid	Species	Y	Evans	1981	Evans, H.E.	1	no	943	Evans, H.E. 1981. Biosystematics of ground-nesting species of Pison in Australia (Hymenoptera: Sphecidae: Trypoxylini). Proceedings of the Entomological Society of Washington 83: 421-427	Article in Journal	USA	yes	Proceedings of the Entomological Society of Washington	na	na
Apoidea	Hymenoptera	Pison		barbatum		Valid	Species	Y	Evans	1981	Evans, H.E.	1	no	943	Evans, H.E. 1981. Biosystematics of ground-nesting species of Pison in Australia (Hymenoptera: Sphecidae: Trypoxylini). Proceedings of the Entomological Society of Washington 83: 421-427	Article in Journal	USA	yes	Proceedings of the Entomological Society of Washington	na	na
Apoidea	Hymenoptera	Pison		ciliatum		Valid	Species	Y	Evans	1981	Evans, H.E.	1	no	943	Evans, H.E. 1981. Biosystematics of ground-nesting species of Pison in Australia (Hymenoptera: Sphecidae: Trypoxylini). Proceedings of the Entomological Society of Washington 83: 421-427	Article in Journal	USA	yes	Proceedings of the Entomological Society of Washington	na	na
Apoidea	Hymenoptera	Pison		pyrrhicum		Valid	Species	Y	Naumann	1990	Naumann, I.D.	1	no	2193	Naumann, I.D. 1990. Description of the caliginosum species group of the genus Pison Jurine (Hymenoptera: Sphecidae: Larrinae). Journal of the Australian Entomological Society 29: 233-245	Article in Journal	Australia	yes	Journal of the Australian Entomological Society	society	AustEntSoc
Apoidea	Hymenoptera	Pison		weiri		Valid	Species	Y	Naumann	1990	Naumann, I.D.	1	no	2193	Naumann, I.D. 1990. Description of the caliginosum species group of the genus Pison Jurine (Hymenoptera: Sphecidae: Larrinae). Journal of the Australian Entomological Society 29: 233-245	Article in Journal	Australia	yes	Journal of the Australian Entomological Society	society	AustEntSoc
Apoidea	Hymenoptera	Piyuma		australiae		Valid	Species	Y	Leclercq	1995	Leclercq, J.	1	no	1716	Leclercq, J. 1995. Hyménoptères Sphécides Crabroniens du genre Piyuma Pate, 1944 des régions Orientale et Australienne. Lambillionea, Revue Internationale d'Entomologie 95: 407-419 [Date published 3/Sept/1995]	Article in Journal	Belgium	yes	Lambillionea, Revue Internationale d'Entomologie	na	na
Apoidea	Hymenoptera	Podagritus		australiensis		Valid	Species	Y	Tsuneki	1977	Tsuneki, K.	1	no	3123	Tsuneki, K. 1977. On the crabronine wasps of the southern Pacific and Australia (Hymenoptera, Sphecidae). Special Publication, Japan Hymenopterists Association 3: 27 pp.	Article in Journal	Japan	yes	Special Publication, Japan Hymenopterists Association	na	na
Apoidea	Hymenoptera	Podagritus		firmatus		Valid	Species	Y	Leclercq	1998	Leclercq, J.	1	no	1720	Leclercq, J. 1998. Hyménoptères Sphécides Crabroniens d'Australie du genera Podagritus Spinola, 1851 (Hymenoptera, Sphecidae). Entomofauna 19(18): 285-308 [Date published 30/Sept/1998]	Article in Journal	Germany	yes	Entomofauna	na	na
Apoidea	Hymenoptera	Podagritus		gibber		Valid	Species	Y	Leclercq	1998	Leclercq, J.	1	no	1720	Leclercq, J. 1998. Hyménoptères Sphécides Crabroniens d'Australie du genera Podagritus Spinola, 1851 (Hymenoptera, Sphecidae). Entomofauna 19(18): 285-308 [Date published 30/Sept/1998]	Article in Journal	Germany	yes	Entomofauna	na	na
Apoidea	Hymenoptera	Podagritus		kelseyi		Valid	Species	Y	Leclercq	1998	Leclercq, J.	1	no	1720	Leclercq, J. 1998. Hyménoptères Sphécides Crabroniens d'Australie du genera Podagritus Spinola, 1851 (Hymenoptera, Sphecidae). Entomofauna 19(18): 285-308 [Date published 30/Sept/1998]	Article in Journal	Germany	yes	Entomofauna	na	na
Apoidea	Hymenoptera	Podagritus		mitrensis		Valid	Species	Y	Leclercq	1998	Leclercq, J.	1	no	1720	Leclercq, J. 1998. Hyménoptères Sphécides Crabroniens d'Australie du genera Podagritus Spinola, 1851 (Hymenoptera, Sphecidae). Entomofauna 19(18): 285-308 [Date published 30/Sept/1998]	Article in Journal	Germany	yes	Entomofauna	na	na
Apoidea	Hymenoptera	Podagritus		mullewanus		Valid	Species	Y	Leclercq	1970	Leclercq, J.	1	no	1712	Leclercq, J. 1970. Quelques Podagritus d'Australie et d'Amérique du Sud (Hymenoptera Sphecidae, Crabroninae). Bulletin des Recherches Agronomiques de Gembloux ns 5: 271-280	Article in Journal	France	no	Bulletin des Recherches Agronomiques de Gembloux	na	na
Apoidea	Hymenoptera	Podagritus		musellus		Valid	Species	Y	Leclercq	1998	Leclercq, J.	1	no	1720	Leclercq, J. 1998. Hyménoptères Sphécides Crabroniens d'Australie du genera Podagritus Spinola, 1851 (Hymenoptera, Sphecidae). Entomofauna 19(18): 285-308 [Date published 30/Sept/1998]	Article in Journal	Germany	yes	Entomofauna	na	na
Apoidea	Hymenoptera	Podagritus		myrmosus		Valid	Species	Y	Leclercq	1998	Leclercq, J.	1	no	1720	Leclercq, J. 1998. Hyménoptères Sphécides Crabroniens d'Australie du genera Podagritus Spinola, 1851 (Hymenoptera, Sphecidae). Entomofauna 19(18): 285-308 [Date published 30/Sept/1998]	Article in Journal	Germany	yes	Entomofauna	na	na
Apoidea	Hymenoptera	Podagritus		napieri		Valid	Species	Y	Leclercq	1998	Leclercq, J.	1	no	1720	Leclercq, J. 1998. Hyménoptères Sphécides Crabroniens d'Australie du genera Podagritus Spinola, 1851 (Hymenoptera, Sphecidae). Entomofauna 19(18): 285-308 [Date published 30/Sept/1998]	Article in Journal	Germany	yes	Entomofauna	na	na
Apoidea	Hymenoptera	Podagritus		noongaris		Valid	Species	Y	Leclercq	1998	Leclercq, J.	1	no	1720	Leclercq, J. 1998. Hyménoptères Sphécides Crabroniens d'Australie du genera Podagritus Spinola, 1851 (Hymenoptera, Sphecidae). Entomofauna 19(18): 285-308 [Date published 30/Sept/1998]	Article in Journal	Germany	yes	Entomofauna	na	na
Apoidea	Hymenoptera	Podagritus		paynesis		Valid	Species	Y	Leclercq	1998	Leclercq, J.	1	no	1720	Leclercq, J. 1998. Hyménoptères Sphécides Crabroniens d'Australie du genera Podagritus Spinola, 1851 (Hymenoptera, Sphecidae). Entomofauna 19(18): 285-308 [Date published 30/Sept/1998]	Article in Journal	Germany	yes	Entomofauna	na	na
Apoidea	Hymenoptera	Podagritus		piscator		Valid	Species	Y	Leclercq	1998	Leclercq, J.	1	no	1720	Leclercq, J. 1998. Hyménoptères Sphécides Crabroniens d'Australie du genera Podagritus Spinola, 1851 (Hymenoptera, Sphecidae). Entomofauna 19(18): 285-308 [Date published 30/Sept/1998]	Article in Journal	Germany	yes	Entomofauna	na	na
Apoidea	Hymenoptera	Podagritus		pixitus		Valid	Species	Y	Leclercq	1998	Leclercq, J.	1	no	1720	Leclercq, J. 1998. Hyménoptères Sphécides Crabroniens d'Australie du genera Podagritus Spinola, 1851 (Hymenoptera, Sphecidae). Entomofauna 19(18): 285-308 [Date published 30/Sept/1998]	Article in Journal	Germany	yes	Entomofauna	na	na
Apoidea	Hymenoptera	Podagritus		trifidus		Valid	Species	Y	Leclercq	1998	Leclercq, J.	1	no	1720	Leclercq, J. 1998. Hyménoptères Sphécides Crabroniens d'Australie du genera Podagritus Spinola, 1851 (Hymenoptera, Sphecidae). Entomofauna 19(18): 285-308 [Date published 30/Sept/1998]	Article in Journal	Germany	yes	Entomofauna	na	na
Apoidea	Hymenoptera	Podagritus		victoriae		Valid	Species	Y	Leclercq	1998	Leclercq, J.	1	no	1720	Leclercq, J. 1998. Hyménoptères Sphécides Crabroniens d'Australie du genera Podagritus Spinola, 1851 (Hymenoptera, Sphecidae). Entomofauna 19(18): 285-308 [Date published 30/Sept/1998]	Article in Journal	Germany	yes	Entomofauna	na	na
Apoidea	Hymenoptera	Pseudoturneria		couloni		Valid	Species	Y	Leclercq	1974	Leclercq, J.	1	no	1714	Leclercq, J. 1974. Crabroniens d'Australie (Hymenoptera Sphecidae and Crabroninae). Bulletin et Annales de la Société Royale Belgique d'Entomologie 110: 37-57	Article in Journal	Belgium	yes	Bulletin et Annales de la Société Royale Belgique d'Entomologie	na	na
Apoidea	Hymenoptera	Pseudoturneria		territorialis		Valid	Species	Y	Leclercq	1974	Leclercq, J.	1	no	1714	Leclercq, J. 1974. Crabroniens d'Australie (Hymenoptera Sphecidae and Crabroninae). Bulletin et Annales de la Société Royale Belgique d'Entomologie 110: 37-57	Article in Journal	Belgium	yes	Bulletin et Annales de la Société Royale Belgique d'Entomologie	na	na
Apoidea	Hymenoptera	Pseudoturneria		turbator		Valid	Species	Y	Leclercq	1998	Leclercq, J.	1	no	1721	Leclercq, J. 1998. Hyménoptères Sphécides Crabroniens d'Australie du genre Pseudoturneria Leclercq, 1954. Lambillionea, Revue Internationale d'Entomologie 98: 299-303 [Date published 2/Jun/1998]	Article in Journal	Belgium	yes	Lambillionea, Revue Internationale d'Entomologie	na	na
Apoidea	Hymenoptera	Pseudoturneria		wubina		Valid	Species	Y	Leclercq	1998	Leclercq, J.	1	no	1721	Leclercq, J. 1998. Hyménoptères Sphécides Crabroniens d'Australie du genre Pseudoturneria Leclercq, 1954. Lambillionea, Revue Internationale d'Entomologie 98: 299-303 [Date published 2/Jun/1998]	Article in Journal	Belgium	yes	Lambillionea, Revue Internationale d'Entomologie	na	na
Apoidea	Hymenoptera	Rhopalum		annickae		Valid	Species	Y	Leclercq	1997	Leclercq, J.	1	no	1718	Leclercq, J. 1997. Hyménoptères Sphécides Crabroniens d'Australie, du genre Rhopalum Stephens, 1829. Notes Fauniques de Gembloux 32: 3-101	Article in Journal	Belgium	no	Notes Fauniques de Gembloux	na	na
Apoidea	Hymenoptera	Rhopalum		anvillum		Valid	Species	Y	Leclercq	1997	Leclercq, J.	1	no	1718	Leclercq, J. 1997. Hyménoptères Sphécides Crabroniens d'Australie, du genre Rhopalum Stephens, 1829. Notes Fauniques de Gembloux 32: 3-101	Article in Journal	Belgium	no	Notes Fauniques de Gembloux	na	na
Apoidea	Hymenoptera	Rhopalum		avocetum		Valid	Species	Y	Leclercq	1997	Leclercq, J.	1	no	1718	Leclercq, J. 1997. Hyménoptères Sphécides Crabroniens d'Australie, du genre Rhopalum Stephens, 1829. Notes Fauniques de Gembloux 32: 3-101	Article in Journal	Belgium	no	Notes Fauniques de Gembloux	na	na
Apoidea	Hymenoptera	Rhopalum		barbatum		Valid	Species	Y	Leclercq	1997	Leclercq, J.	1	no	1718	Leclercq, J. 1997. Hyménoptères Sphécides Crabroniens d'Australie, du genre Rhopalum Stephens, 1829. Notes Fauniques de Gembloux 32: 3-101	Article in Journal	Belgium	no	Notes Fauniques de Gembloux	na	na
Apoidea	Hymenoptera	Rhopalum		bendorense		Valid	Species	Y	Leclercq	1997	Leclercq, J.	1	no	1718	Leclercq, J. 1997. Hyménoptères Sphécides Crabroniens d'Australie, du genre Rhopalum Stephens, 1829. Notes Fauniques de Gembloux 32: 3-101	Article in Journal	Belgium	no	Notes Fauniques de Gembloux	na	na
Apoidea	Hymenoptera	Rhopalum		brachinense		Valid	Species	Y	Leclercq	1997	Leclercq, J.	1	no	1718	Leclercq, J. 1997. Hyménoptères Sphécides Crabroniens d'Australie, du genre Rhopalum Stephens, 1829. Notes Fauniques de Gembloux 32: 3-101	Article in Journal	Belgium	no	Notes Fauniques de Gembloux	na	na
Apoidea	Hymenoptera	Rhopalum		brontense		Valid	Species	Y	Leclercq	1997	Leclercq, J.	1	no	1718	Leclercq, J. 1997. Hyménoptères Sphécides Crabroniens d'Australie, du genre Rhopalum Stephens, 1829. Notes Fauniques de Gembloux 32: 3-101	Article in Journal	Belgium	no	Notes Fauniques de Gembloux	na	na
Apoidea	Hymenoptera	Rhopalum		calixtoides		Valid	Species	Y	Leclercq	1997	Leclercq, J.	1	no	1718	Leclercq, J. 1997. Hyménoptères Sphécides Crabroniens d'Australie, du genre Rhopalum Stephens, 1829. Notes Fauniques de Gembloux 32: 3-101	Article in Journal	Belgium	no	Notes Fauniques de Gembloux	na	na
Apoidea	Hymenoptera	Rhopalum		canberrae		Valid	Species	Y	Leclercq	1997	Leclercq, J.	1	no	1718	Leclercq, J. 1997. Hyménoptères Sphécides Crabroniens d'Australie, du genre Rhopalum Stephens, 1829. Notes Fauniques de Gembloux 32: 3-101	Article in Journal	Belgium	no	Notes Fauniques de Gembloux	na	na
Apoidea	Hymenoptera	Rhopalum		caniae		Valid	Species	Y	Leclercq	1997	Leclercq, J.	1	no	1718	Leclercq, J. 1997. Hyménoptères Sphécides Crabroniens d'Australie, du genre Rhopalum Stephens, 1829. Notes Fauniques de Gembloux 32: 3-101	Article in Journal	Belgium	no	Notes Fauniques de Gembloux	na	na
Apoidea	Hymenoptera	Rhopalum		cardalae		Valid	Species	Y	Leclercq	1997	Leclercq, J.	1	no	1718	Leclercq, J. 1997. Hyménoptères Sphécides Crabroniens d'Australie, du genre Rhopalum Stephens, 1829. Notes Fauniques de Gembloux 32: 3-101	Article in Journal	Belgium	no	Notes Fauniques de Gembloux	na	na
Apoidea	Hymenoptera	Rhopalum		carnegiacum		Valid	Species	Y	Leclercq	1978	Leclercq, J.	1	no	1715	Leclercq, J. 1978. Crabroniens du genre Rhopalum Stephens trouvés en Australie (Hymenoptera Sphecidae). Bulletin de la Société Royale des Sciences de Liège 47: 352-362	Article in Journal	Belgium	no	Bulletin de la Société Royale des Sciences de Liège	na	na
Apoidea	Hymenoptera	Rhopalum		carrabinum		Valid	Species	Y	Leclercq	1997	Leclercq, J.	1	no	1718	Leclercq, J. 1997. Hyménoptères Sphécides Crabroniens d'Australie, du genre Rhopalum Stephens, 1829. Notes Fauniques de Gembloux 32: 3-101	Article in Journal	Belgium	no	Notes Fauniques de Gembloux	na	na
Apoidea	Hymenoptera	Rhopalum		chinchillae		Valid	Species	Y	Leclercq	1997	Leclercq, J.	1	no	1718	Leclercq, J. 1997. Hyménoptères Sphécides Crabroniens d'Australie, du genre Rhopalum Stephens, 1829. Notes Fauniques de Gembloux 32: 3-101	Article in Journal	Belgium	no	Notes Fauniques de Gembloux	na	na
Apoidea	Hymenoptera	Rhopalum		cockleum		Valid	Species	Y	Leclercq	1997	Leclercq, J.	1	no	1718	Leclercq, J. 1997. Hyménoptères Sphécides Crabroniens d'Australie, du genre Rhopalum Stephens, 1829. Notes Fauniques de Gembloux 32: 3-101	Article in Journal	Belgium	no	Notes Fauniques de Gembloux	na	na
Apoidea	Hymenoptera	Rhopalum		collessi		Valid	Species	Y	Leclercq	1997	Leclercq, J.	1	no	1718	Leclercq, J. 1997. Hyménoptères Sphécides Crabroniens d'Australie, du genre Rhopalum Stephens, 1829. Notes Fauniques de Gembloux 32: 3-101	Article in Journal	Belgium	no	Notes Fauniques de Gembloux	na	na
Apoidea	Hymenoptera	Rhopalum		cornigerum		Valid	Species	Y	Tsuneki	1977	Tsuneki, K.	1	no	3123	Tsuneki, K. 1977. On the crabronine wasps of the southern Pacific and Australia (Hymenoptera, Sphecidae). Special Publication, Japan Hymenopterists Association 3: 27 pp.	Article in Journal	Japan	yes	Special Publication, Japan Hymenopterists Association	na	na
Apoidea	Hymenoptera	Rhopalum		curryi		Valid	Species	Y	Leclercq	1997	Leclercq, J.	1	no	1718	Leclercq, J. 1997. Hyménoptères Sphécides Crabroniens d'Australie, du genre Rhopalum Stephens, 1829. Notes Fauniques de Gembloux 32: 3-101	Article in Journal	Belgium	no	Notes Fauniques de Gembloux	na	na
Apoidea	Hymenoptera	Rhopalum		curtisi		Valid	Species	Y	Leclercq	1997	Leclercq, J.	1	no	1718	Leclercq, J. 1997. Hyménoptères Sphécides Crabroniens d'Australie, du genre Rhopalum Stephens, 1829. Notes Fauniques de Gembloux 32: 3-101	Article in Journal	Belgium	no	Notes Fauniques de Gembloux	na	na
Apoidea	Hymenoptera	Rhopalum		dellum		Valid	Species	Y	Leclercq	1997	Leclercq, J.	1	no	1718	Leclercq, J. 1997. Hyménoptères Sphécides Crabroniens d'Australie, du genre Rhopalum Stephens, 1829. Notes Fauniques de Gembloux 32: 3-101	Article in Journal	Belgium	no	Notes Fauniques de Gembloux	na	na
Apoidea	Hymenoptera	Rhopalum		distractum		Valid	Species	Y	Leclercq	1997	Leclercq, J.	1	no	1718	Leclercq, J. 1997. Hyménoptères Sphécides Crabroniens d'Australie, du genre Rhopalum Stephens, 1829. Notes Fauniques de Gembloux 32: 3-101	Article in Journal	Belgium	no	Notes Fauniques de Gembloux	na	na
Apoidea	Hymenoptera	Rhopalum		downiense		Valid	Species	Y	Leclercq	1997	Leclercq, J.	1	no	1718	Leclercq, J. 1997. Hyménoptères Sphécides Crabroniens d'Australie, du genre Rhopalum Stephens, 1829. Notes Fauniques de Gembloux 32: 3-101	Article in Journal	Belgium	no	Notes Fauniques de Gembloux	na	na
Apoidea	Hymenoptera	Rhopalum		drexum		Valid	Species	Y	Leclercq	1997	Leclercq, J.	1	no	1718	Leclercq, J. 1997. Hyménoptères Sphécides Crabroniens d'Australie, du genre Rhopalum Stephens, 1829. Notes Fauniques de Gembloux 32: 3-101	Article in Journal	Belgium	no	Notes Fauniques de Gembloux	na	na
Apoidea	Hymenoptera	Rhopalum		duratum		Valid	Species	Y	Leclercq	1997	Leclercq, J.	1	no	1718	Leclercq, J. 1997. Hyménoptères Sphécides Crabroniens d'Australie, du genre Rhopalum Stephens, 1829. Notes Fauniques de Gembloux 32: 3-101	Article in Journal	Belgium	no	Notes Fauniques de Gembloux	na	na
Apoidea	Hymenoptera	Rhopalum		emolitum		Valid	Species	Y	Leclercq	1997	Leclercq, J.	1	no	1718	Leclercq, J. 1997. Hyménoptères Sphécides Crabroniens d'Australie, du genre Rhopalum Stephens, 1829. Notes Fauniques de Gembloux 32: 3-101	Article in Journal	Belgium	no	Notes Fauniques de Gembloux	na	na
Apoidea	Hymenoptera	Rhopalum		encabbae		Valid	Species	Y	Leclercq	1997	Leclercq, J.	1	no	1718	Leclercq, J. 1997. Hyménoptères Sphécides Crabroniens d'Australie, du genre Rhopalum Stephens, 1829. Notes Fauniques de Gembloux 32: 3-101	Article in Journal	Belgium	no	Notes Fauniques de Gembloux	na	na
Apoidea	Hymenoptera	Rhopalum		etiratum		Valid	Species	Y	Leclercq	1997	Leclercq, J.	1	no	1718	Leclercq, J. 1997. Hyménoptères Sphécides Crabroniens d'Australie, du genre Rhopalum Stephens, 1829. Notes Fauniques de Gembloux 32: 3-101	Article in Journal	Belgium	no	Notes Fauniques de Gembloux	na	na
Apoidea	Hymenoptera	Rhopalum		euclanum		Valid	Species	Y	Leclercq	1997	Leclercq, J.	1	no	1718	Leclercq, J. 1997. Hyménoptères Sphécides Crabroniens d'Australie, du genre Rhopalum Stephens, 1829. Notes Fauniques de Gembloux 32: 3-101	Article in Journal	Belgium	no	Notes Fauniques de Gembloux	na	na
Apoidea	Hymenoptera	Rhopalum		eustonense		Valid	Species	Y	Leclercq	1997	Leclercq, J.	1	no	1718	Leclercq, J. 1997. Hyménoptères Sphécides Crabroniens d'Australie, du genre Rhopalum Stephens, 1829. Notes Fauniques de Gembloux 32: 3-101	Article in Journal	Belgium	no	Notes Fauniques de Gembloux	na	na
Apoidea	Hymenoptera	Rhopalum		evansianum		Valid	Species	Y	Leclercq	1978	Leclercq, J.	1	no	1715	Leclercq, J. 1978. Crabroniens du genre Rhopalum Stephens trouvés en Australie (Hymenoptera Sphecidae). Bulletin de la Société Royale des Sciences de Liège 47: 352-362	Article in Journal	Belgium	no	Bulletin de la Société Royale des Sciences de Liège	na	na
Apoidea	Hymenoptera	Rhopalum		evictum		Valid	Species	Y	Leclercq	1978	Leclercq, J.	1	no	1715	Leclercq, J. 1978. Crabroniens du genre Rhopalum Stephens trouvés en Australie (Hymenoptera Sphecidae). Bulletin de la Société Royale des Sciences de Liège 47: 352-362	Article in Journal	Belgium	no	Bulletin de la Société Royale des Sciences de Liège	na	na
Apoidea	Hymenoptera	Rhopalum		evocatum		Valid	Species	Y	Leclercq	1997	Leclercq, J.	1	no	1718	Leclercq, J. 1997. Hyménoptères Sphécides Crabroniens d'Australie, du genre Rhopalum Stephens, 1829. Notes Fauniques de Gembloux 32: 3-101	Article in Journal	Belgium	no	Notes Fauniques de Gembloux	na	na
Apoidea	Hymenoptera	Rhopalum		ewartense		Valid	Species	Y	Leclercq	1997	Leclercq, J.	1	no	1718	Leclercq, J. 1997. Hyménoptères Sphécides Crabroniens d'Australie, du genre Rhopalum Stephens, 1829. Notes Fauniques de Gembloux 32: 3-101	Article in Journal	Belgium	no	Notes Fauniques de Gembloux	na	na
Apoidea	Hymenoptera	Rhopalum		exleyi		Valid	Species	Y	Leclercq	1997	Leclercq, J.	1	no	1718	Leclercq, J. 1997. Hyménoptères Sphécides Crabroniens d'Australie, du genre Rhopalum Stephens, 1829. Notes Fauniques de Gembloux 32: 3-101	Article in Journal	Belgium	no	Notes Fauniques de Gembloux	na	na
Apoidea	Hymenoptera	Rhopalum		eyrense		Valid	Species	Y	Leclercq	1997	Leclercq, J.	1	no	1718	Leclercq, J. 1997. Hyménoptères Sphécides Crabroniens d'Australie, du genre Rhopalum Stephens, 1829. Notes Fauniques de Gembloux 32: 3-101	Article in Journal	Belgium	no	Notes Fauniques de Gembloux	na	na
Apoidea	Hymenoptera	Rhopalum		famicum		Valid	Species	Y	Leclercq	1978	Leclercq, J.	1	no	1715	Leclercq, J. 1978. Crabroniens du genre Rhopalum Stephens trouvés en Australie (Hymenoptera Sphecidae). Bulletin de la Société Royale des Sciences de Liège 47: 352-362	Article in Journal	Belgium	no	Bulletin de la Société Royale des Sciences de Liège	na	na
Apoidea	Hymenoptera	Rhopalum		fannum		Valid	Species	Y	Leclercq	1997	Leclercq, J.	1	no	1718	Leclercq, J. 1997. Hyménoptères Sphécides Crabroniens d'Australie, du genre Rhopalum Stephens, 1829. Notes Fauniques de Gembloux 32: 3-101	Article in Journal	Belgium	no	Notes Fauniques de Gembloux	na	na
Apoidea	Hymenoptera	Rhopalum		fraxinum		Valid	Species	Y	Leclercq	1997	Leclercq, J.	1	no	1718	Leclercq, J. 1997. Hyménoptères Sphécides Crabroniens d'Australie, du genre Rhopalum Stephens, 1829. Notes Fauniques de Gembloux 32: 3-101	Article in Journal	Belgium	no	Notes Fauniques de Gembloux	na	na
Apoidea	Hymenoptera	Rhopalum		freturum		Valid	Species	Y	Leclercq	1997	Leclercq, J.	1	no	1718	Leclercq, J. 1997. Hyménoptères Sphécides Crabroniens d'Australie, du genre Rhopalum Stephens, 1829. Notes Fauniques de Gembloux 32: 3-101	Article in Journal	Belgium	no	Notes Fauniques de Gembloux	na	na
Apoidea	Hymenoptera	Rhopalum		frogatum		Valid	Species	Y	Leclercq	1997	Leclercq, J.	1	no	1718	Leclercq, J. 1997. Hyménoptères Sphécides Crabroniens d'Australie, du genre Rhopalum Stephens, 1829. Notes Fauniques de Gembloux 32: 3-101	Article in Journal	Belgium	no	Notes Fauniques de Gembloux	na	na
Apoidea	Hymenoptera	Rhopalum		futilum		Valid	Species	Y	Leclercq	1997	Leclercq, J.	1	no	1718	Leclercq, J. 1997. Hyménoptères Sphécides Crabroniens d'Australie, du genre Rhopalum Stephens, 1829. Notes Fauniques de Gembloux 32: 3-101	Article in Journal	Belgium	no	Notes Fauniques de Gembloux	na	na
Apoidea	Hymenoptera	Rhopalum		gauldi		Valid	Species	Y	Leclercq	1997	Leclercq, J.	1	no	1718	Leclercq, J. 1997. Hyménoptères Sphécides Crabroniens d'Australie, du genre Rhopalum Stephens, 1829. Notes Fauniques de Gembloux 32: 3-101	Article in Journal	Belgium	no	Notes Fauniques de Gembloux	na	na
Apoidea	Hymenoptera	Rhopalum		gloriosum		Valid	Species	Y	Leclercq	1997	Leclercq, J.	1	no	1718	Leclercq, J. 1997. Hyménoptères Sphécides Crabroniens d'Australie, du genre Rhopalum Stephens, 1829. Notes Fauniques de Gembloux 32: 3-101	Article in Journal	Belgium	no	Notes Fauniques de Gembloux	na	na
Apoidea	Hymenoptera	Rhopalum		gratorineum		Valid	Species	Y	Leclercq	1997	Leclercq, J.	1	no	1718	Leclercq, J. 1997. Hyménoptères Sphécides Crabroniens d'Australie, du genre Rhopalum Stephens, 1829. Notes Fauniques de Gembloux 32: 3-101	Article in Journal	Belgium	no	Notes Fauniques de Gembloux	na	na
Apoidea	Hymenoptera	Rhopalum		hannense		Valid	Species	Y	Leclercq	1997	Leclercq, J.	1	no	1718	Leclercq, J. 1997. Hyménoptères Sphécides Crabroniens d'Australie, du genre Rhopalum Stephens, 1829. Notes Fauniques de Gembloux 32: 3-101	Article in Journal	Belgium	no	Notes Fauniques de Gembloux	na	na
Apoidea	Hymenoptera	Rhopalum		hawkerense		Valid	Species	Y	Leclercq	1997	Leclercq, J.	1	no	1718	Leclercq, J. 1997. Hyménoptères Sphécides Crabroniens d'Australie, du genre Rhopalum Stephens, 1829. Notes Fauniques de Gembloux 32: 3-101	Article in Journal	Belgium	no	Notes Fauniques de Gembloux	na	na
Apoidea	Hymenoptera	Rhopalum		hobartense		Valid	Species	Y	Leclercq	1997	Leclercq, J.	1	no	1718	Leclercq, J. 1997. Hyménoptères Sphécides Crabroniens d'Australie, du genre Rhopalum Stephens, 1829. Notes Fauniques de Gembloux 32: 3-101	Article in Journal	Belgium	no	Notes Fauniques de Gembloux	na	na
Apoidea	Hymenoptera	Rhopalum		inopinum		Valid	Species	Y	Leclercq	1997	Leclercq, J.	1	no	1718	Leclercq, J. 1997. Hyménoptères Sphécides Crabroniens d'Australie, du genre Rhopalum Stephens, 1829. Notes Fauniques de Gembloux 32: 3-101	Article in Journal	Belgium	no	Notes Fauniques de Gembloux	na	na
Apoidea	Hymenoptera	Rhopalum		juventum		Valid	Species	Y	Leclercq	1997	Leclercq, J.	1	no	1718	Leclercq, J. 1997. Hyménoptères Sphécides Crabroniens d'Australie, du genre Rhopalum Stephens, 1829. Notes Fauniques de Gembloux 32: 3-101	Article in Journal	Belgium	no	Notes Fauniques de Gembloux	na	na
Apoidea	Hymenoptera	Rhopalum		juxtatum		Valid	Species	Y	Leclercq	1997	Leclercq, J.	1	no	1718	Leclercq, J. 1997. Hyménoptères Sphécides Crabroniens d'Australie, du genre Rhopalum Stephens, 1829. Notes Fauniques de Gembloux 32: 3-101	Article in Journal	Belgium	no	Notes Fauniques de Gembloux	na	na
Apoidea	Hymenoptera	Rhopalum		kystum		Valid	Species	Y	Leclercq	1997	Leclercq, J.	1	no	1718	Leclercq, J. 1997. Hyménoptères Sphécides Crabroniens d'Australie, du genre Rhopalum Stephens, 1829. Notes Fauniques de Gembloux 32: 3-101	Article in Journal	Belgium	no	Notes Fauniques de Gembloux	na	na
Apoidea	Hymenoptera	Rhopalum		livanum		Valid	Species	Y	Leclercq	1997	Leclercq, J.	1	no	1718	Leclercq, J. 1997. Hyménoptères Sphécides Crabroniens d'Australie, du genre Rhopalum Stephens, 1829. Notes Fauniques de Gembloux 32: 3-101	Article in Journal	Belgium	no	Notes Fauniques de Gembloux	na	na
Apoidea	Hymenoptera	Rhopalum		masticatum		Valid	Species	Y	Leclercq	1997	Leclercq, J.	1	no	1718	Leclercq, J. 1997. Hyménoptères Sphécides Crabroniens d'Australie, du genre Rhopalum Stephens, 1829. Notes Fauniques de Gembloux 32: 3-101	Article in Journal	Belgium	no	Notes Fauniques de Gembloux	na	na
Apoidea	Hymenoptera	Rhopalum		matthewsi		Valid	Species	Y	Leclercq	1997	Leclercq, J.	1	no	1718	Leclercq, J. 1997. Hyménoptères Sphécides Crabroniens d'Australie, du genre Rhopalum Stephens, 1829. Notes Fauniques de Gembloux 32: 3-101	Article in Journal	Belgium	no	Notes Fauniques de Gembloux	na	na
Apoidea	Hymenoptera	Rhopalum		mouranum		Valid	Species	Y	Leclercq	1997	Leclercq, J.	1	no	1718	Leclercq, J. 1997. Hyménoptères Sphécides Crabroniens d'Australie, du genre Rhopalum Stephens, 1829. Notes Fauniques de Gembloux 32: 3-101	Article in Journal	Belgium	no	Notes Fauniques de Gembloux	na	na
Apoidea	Hymenoptera	Rhopalum		munitum		Valid	Species	Y	Leclercq	1997	Leclercq, J.	1	no	1718	Leclercq, J. 1997. Hyménoptères Sphécides Crabroniens d'Australie, du genre Rhopalum Stephens, 1829. Notes Fauniques de Gembloux 32: 3-101	Article in Journal	Belgium	no	Notes Fauniques de Gembloux	na	na
Apoidea	Hymenoptera	Rhopalum		nasale		Valid	Species	Y	Pulawski	2010	Pulawski, W.J.	1	no	2487	Pulawski, W.J. 2010. Rhopalum nasale, a new species from Australia (Hymenoptera: Crabronidae). Journal of Hymenoptera Research 19: 139-143	Article in Journal	USA	yes	Journal of Hymenoptera Research	na	na
Apoidea	Hymenoptera	Rhopalum		naumanni		Valid	Species	Y	Leclercq	1997	Leclercq, J.	1	no	1718	Leclercq, J. 1997. Hyménoptères Sphécides Crabroniens d'Australie, du genre Rhopalum Stephens, 1829. Notes Fauniques de Gembloux 32: 3-101	Article in Journal	Belgium	no	Notes Fauniques de Gembloux	na	na
Apoidea	Hymenoptera	Rhopalum		nordicum		Valid	Species	Y	Leclercq	1997	Leclercq, J.	1	no	1718	Leclercq, J. 1997. Hyménoptères Sphécides Crabroniens d'Australie, du genre Rhopalum Stephens, 1829. Notes Fauniques de Gembloux 32: 3-101	Article in Journal	Belgium	no	Notes Fauniques de Gembloux	na	na
Apoidea	Hymenoptera	Rhopalum		nynganum		Valid	Species	Y	Leclercq	1997	Leclercq, J.	1	no	1718	Leclercq, J. 1997. Hyménoptères Sphécides Crabroniens d'Australie, du genre Rhopalum Stephens, 1829. Notes Fauniques de Gembloux 32: 3-101	Article in Journal	Belgium	no	Notes Fauniques de Gembloux	na	na
Apoidea	Hymenoptera	Rhopalum		panicum		Valid	Species	Y	Leclercq	1997	Leclercq, J.	1	no	1718	Leclercq, J. 1997. Hyménoptères Sphécides Crabroniens d'Australie, du genre Rhopalum Stephens, 1829. Notes Fauniques de Gembloux 32: 3-101	Article in Journal	Belgium	no	Notes Fauniques de Gembloux	na	na
Apoidea	Hymenoptera	Rhopalum		penongum		Valid	Species	Y	Leclercq	1997	Leclercq, J.	1	no	1718	Leclercq, J. 1997. Hyménoptères Sphécides Crabroniens d'Australie, du genre Rhopalum Stephens, 1829. Notes Fauniques de Gembloux 32: 3-101	Article in Journal	Belgium	no	Notes Fauniques de Gembloux	na	na
Apoidea	Hymenoptera	Rhopalum		pepitum		Valid	Species	Y	Leclercq	1997	Leclercq, J.	1	no	1718	Leclercq, J. 1997. Hyménoptères Sphécides Crabroniens d'Australie, du genre Rhopalum Stephens, 1829. Notes Fauniques de Gembloux 32: 3-101	Article in Journal	Belgium	no	Notes Fauniques de Gembloux	na	na
Apoidea	Hymenoptera	Rhopalum		piosense		Valid	Species	Y	Leclercq	1997	Leclercq, J.	1	no	1718	Leclercq, J. 1997. Hyménoptères Sphécides Crabroniens d'Australie, du genre Rhopalum Stephens, 1829. Notes Fauniques de Gembloux 32: 3-101	Article in Journal	Belgium	no	Notes Fauniques de Gembloux	na	na
Apoidea	Hymenoptera	Rhopalum		rockyense		Valid	Species	Y	Leclercq	1997	Leclercq, J.	1	no	1718	Leclercq, J. 1997. Hyménoptères Sphécides Crabroniens d'Australie, du genre Rhopalum Stephens, 1829. Notes Fauniques de Gembloux 32: 3-101	Article in Journal	Belgium	no	Notes Fauniques de Gembloux	na	na
Apoidea	Hymenoptera	Rhopalum		stelmanni		Valid	Species	Y	Leclercq	1997	Leclercq, J.	1	no	1718	Leclercq, J. 1997. Hyménoptères Sphécides Crabroniens d'Australie, du genre Rhopalum Stephens, 1829. Notes Fauniques de Gembloux 32: 3-101	Article in Journal	Belgium	no	Notes Fauniques de Gembloux	na	na
Apoidea	Hymenoptera	Rhopalum		subtaeniatum		Valid	Species	Y	Leclercq	1997	Leclercq, J.	1	no	1718	Leclercq, J. 1997. Hyménoptères Sphécides Crabroniens d'Australie, du genre Rhopalum Stephens, 1829. Notes Fauniques de Gembloux 32: 3-101	Article in Journal	Belgium	no	Notes Fauniques de Gembloux	na	na
Apoidea	Hymenoptera	Rhopalum		tegulatum		Valid	Species	Y	Leclercq	1997	Leclercq, J.	1	no	1718	Leclercq, J. 1997. Hyménoptères Sphécides Crabroniens d'Australie, du genre Rhopalum Stephens, 1829. Notes Fauniques de Gembloux 32: 3-101	Article in Journal	Belgium	no	Notes Fauniques de Gembloux	na	na
Apoidea	Hymenoptera	Rhopalum		urallae		Valid	Species	Y	Leclercq	1997	Leclercq, J.	1	no	1718	Leclercq, J. 1997. Hyménoptères Sphécides Crabroniens d'Australie, du genre Rhopalum Stephens, 1829. Notes Fauniques de Gembloux 32: 3-101	Article in Journal	Belgium	no	Notes Fauniques de Gembloux	na	na
Apoidea	Hymenoptera	Rhopalum		weipanum		Valid	Species	Y	Leclercq	1997	Leclercq, J.	1	no	1718	Leclercq, J. 1997. Hyménoptères Sphécides Crabroniens d'Australie, du genre Rhopalum Stephens, 1829. Notes Fauniques de Gembloux 32: 3-101	Article in Journal	Belgium	no	Notes Fauniques de Gembloux	na	na
Apoidea	Hymenoptera	Rhopalum		wonvillei		Valid	Species	Y	Leclercq	1997	Leclercq, J.	1	no	1718	Leclercq, J. 1997. Hyménoptères Sphécides Crabroniens d'Australie, du genre Rhopalum Stephens, 1829. Notes Fauniques de Gembloux 32: 3-101	Article in Journal	Belgium	no	Notes Fauniques de Gembloux	na	na
Apoidea	Hymenoptera	Rhopalum		yallingupae		Valid	Species	Y	Leclercq	1997	Leclercq, J.	1	no	1718	Leclercq, J. 1997. Hyménoptères Sphécides Crabroniens d'Australie, du genre Rhopalum Stephens, 1829. Notes Fauniques de Gembloux 32: 3-101	Article in Journal	Belgium	no	Notes Fauniques de Gembloux	na	na
Apoidea	Hymenoptera	Sericophorus		argentifacies		Valid	Species	Y	Lomholdt in Lomholdt & Pulawski	2010	Lomholdt, O. in Lomholdt, O. & Pulawski, W.J.	1	yes	1784	Lomholdt, O. & Pulawski, W.J. 2010. A revision of the wasp genus Sericophorus F. Smith, 1851 (Hymenoptera: Apoidea: Crabronidae). Proceedings of the California Academy of Sciences Series 4 61: 1-234	Article in Journal	USA	no	Proceedings of the California Academy of Sciences	na	na
Apoidea	Hymenoptera	Sericophorus		arrernte		Valid	Species	Y	Pulawski in Lomholdt & Pulawski	2010	Pulawski, W.J. in Lomholdt, O. & Pulawski, W.J.	1	yes	1784	Lomholdt, O. & Pulawski, W.J. 2010. A revision of the wasp genus Sericophorus F. Smith, 1851 (Hymenoptera: Apoidea: Crabronidae). Proceedings of the California Academy of Sciences Series 4 61: 1-234	Article in Journal	USA	no	Proceedings of the California Academy of Sciences	na	na
Apoidea	Hymenoptera	Sericophorus		aurifrons		Valid	Species	Y	Lomholdt in Lomholdt & Pulawski	2010	Lomholdt, O. in Lomholdt, O. & Pulawski, W.J.	1	yes	1784	Lomholdt, O. & Pulawski, W.J. 2010. A revision of the wasp genus Sericophorus F. Smith, 1851 (Hymenoptera: Apoidea: Crabronidae). Proceedings of the California Academy of Sciences Series 4 61: 1-234	Article in Journal	USA	no	Proceedings of the California Academy of Sciences	na	na
Apoidea	Hymenoptera	Sericophorus		axillaris		Valid	Species	Y	Lomholdt in Lomholdt & Pulawski	2010	Lomholdt, O. in Lomholdt, O. & Pulawski, W.J.	1	yes	1784	Lomholdt, O. & Pulawski, W.J. 2010. A revision of the wasp genus Sericophorus F. Smith, 1851 (Hymenoptera: Apoidea: Crabronidae). Proceedings of the California Academy of Sciences Series 4 61: 1-234	Article in Journal	USA	no	Proceedings of the California Academy of Sciences	na	na
Apoidea	Hymenoptera	Sericophorus		barakula		Valid	Species	Y	Pulawski in Lomholdt & Pulawski	2010	Pulawski, W.J. in Lomholdt, O. & Pulawski, W.J.	1	yes	1784	Lomholdt, O. & Pulawski, W.J. 2010. A revision of the wasp genus Sericophorus F. Smith, 1851 (Hymenoptera: Apoidea: Crabronidae). Proceedings of the California Academy of Sciences Series 4 61: 1-234	Article in Journal	USA	no	Proceedings of the California Academy of Sciences	na	na
Apoidea	Hymenoptera	Sericophorus		bicellularis		Valid	Species	Y	Pulawski in Lomholdt & Pulawski	2010	Pulawski, W.J. in Lomholdt, O. & Pulawski, W.J.	1	yes	1784	Lomholdt, O. & Pulawski, W.J. 2010. A revision of the wasp genus Sericophorus F. Smith, 1851 (Hymenoptera: Apoidea: Crabronidae). Proceedings of the California Academy of Sciences Series 4 61: 1-234	Article in Journal	USA	no	Proceedings of the California Academy of Sciences	na	na
Apoidea	Hymenoptera	Sericophorus		cardaleae		Valid	Species	Y	Lomholdt in Lomholdt & Pulawski	2010	Lomholdt, O. in Lomholdt, O. & Pulawski, W.J.	1	yes	1784	Lomholdt, O. & Pulawski, W.J. 2010. A revision of the wasp genus Sericophorus F. Smith, 1851 (Hymenoptera: Apoidea: Crabronidae). Proceedings of the California Academy of Sciences Series 4 61: 1-234	Article in Journal	USA	no	Proceedings of the California Academy of Sciences	na	na
Apoidea	Hymenoptera	Sericophorus		centralis		Valid	Species	Y	Pulawski in Lomholdt & Pulawski	2010	Pulawski, W.J. in Lomholdt, O. & Pulawski, W.J.	1	yes	1784	Lomholdt, O. & Pulawski, W.J. 2010. A revision of the wasp genus Sericophorus F. Smith, 1851 (Hymenoptera: Apoidea: Crabronidae). Proceedings of the California Academy of Sciences Series 4 61: 1-234	Article in Journal	USA	no	Proceedings of the California Academy of Sciences	na	na
Apoidea	Hymenoptera	Sericophorus		chrysophorus		Valid	Species	Y	Pulawski in Lomholdt & Pulawski	2010	Pulawski, W.J. in Lomholdt, O. & Pulawski, W.J.	1	yes	1784	Lomholdt, O. & Pulawski, W.J. 2010. A revision of the wasp genus Sericophorus F. Smith, 1851 (Hymenoptera: Apoidea: Crabronidae). Proceedings of the California Academy of Sciences Series 4 61: 1-234	Article in Journal	USA	no	Proceedings of the California Academy of Sciences	na	na
Apoidea	Hymenoptera	Sericophorus		confusus		Valid	Species	Y	Lomholdt in Lomholdt & Pulawski	2010	Lomholdt, O. in Lomholdt, O. & Pulawski, W.J.	1	yes	1784	Lomholdt, O. & Pulawski, W.J. 2010. A revision of the wasp genus Sericophorus F. Smith, 1851 (Hymenoptera: Apoidea: Crabronidae). Proceedings of the California Academy of Sciences Series 4 61: 1-234	Article in Journal	USA	no	Proceedings of the California Academy of Sciences	na	na
Apoidea	Hymenoptera	Sericophorus		cornutus		Valid	Species	Y	Lomholdt in Lomholdt & Pulawski	2010	Lomholdt, O. in Lomholdt, O. & Pulawski, W.J.	1	yes	1784	Lomholdt, O. & Pulawski, W.J. 2010. A revision of the wasp genus Sericophorus F. Smith, 1851 (Hymenoptera: Apoidea: Crabronidae). Proceedings of the California Academy of Sciences Series 4 61: 1-234	Article in Journal	USA	no	Proceedings of the California Academy of Sciences	na	na
Apoidea	Hymenoptera	Sericophorus		deserticola		Valid	Species	Y	Pulawski in Lomholdt & Pulawski	2010	Pulawski, W.J. in Lomholdt, O. & Pulawski, W.J.	1	yes	1784	Lomholdt, O. & Pulawski, W.J. 2010. A revision of the wasp genus Sericophorus F. Smith, 1851 (Hymenoptera: Apoidea: Crabronidae). Proceedings of the California Academy of Sciences Series 4 61: 1-234	Article in Journal	USA	no	Proceedings of the California Academy of Sciences	na	na
Apoidea	Hymenoptera	Sericophorus		evansi		Valid	Species	Y	Lomholdt in Lomholdt & Pulawski	2010	Lomholdt, O. in Lomholdt, O. & Pulawski, W.J.	1	yes	1784	Lomholdt, O. & Pulawski, W.J. 2010. A revision of the wasp genus Sericophorus F. Smith, 1851 (Hymenoptera: Apoidea: Crabronidae). Proceedings of the California Academy of Sciences Series 4 61: 1-234	Article in Journal	USA	no	Proceedings of the California Academy of Sciences	na	na
Apoidea	Hymenoptera	Sericophorus		fissus		Valid	Species	Y	Lomholdt in Lomholdt & Pulawski	2010	Lomholdt, O. in Lomholdt, O. & Pulawski, W.J.	1	yes	1784	Lomholdt, O. & Pulawski, W.J. 2010. A revision of the wasp genus Sericophorus F. Smith, 1851 (Hymenoptera: Apoidea: Crabronidae). Proceedings of the California Academy of Sciences Series 4 61: 1-234	Article in Journal	USA	no	Proceedings of the California Academy of Sciences	na	na
Apoidea	Hymenoptera	Sericophorus		flavipes		Valid	Species	Y	Pulawski in Lomholdt & Pulawski	2010	Pulawski, W.J. in Lomholdt, O. & Pulawski, W.J.	1	yes	1784	Lomholdt, O. & Pulawski, W.J. 2010. A revision of the wasp genus Sericophorus F. Smith, 1851 (Hymenoptera: Apoidea: Crabronidae). Proceedings of the California Academy of Sciences Series 4 61: 1-234	Article in Journal	USA	no	Proceedings of the California Academy of Sciences	na	na
Apoidea	Hymenoptera	Sericophorus		flavorufoniger		Valid	Species	Y	Pulawski in Lomholdt & Pulawski	2010	Pulawski, W.J. in Lomholdt, O. & Pulawski, W.J.	1	yes	1784	Lomholdt, O. & Pulawski, W.J. 2010. A revision of the wasp genus Sericophorus F. Smith, 1851 (Hymenoptera: Apoidea: Crabronidae). Proceedings of the California Academy of Sciences Series 4 61: 1-234	Article in Journal	USA	no	Proceedings of the California Academy of Sciences	na	na
Apoidea	Hymenoptera	Sericophorus		genalis		Valid	Species	Y	Pulawski in Lomholdt & Pulawski	2010	Pulawski, W.J. in Lomholdt, O. & Pulawski, W.J.	1	yes	1784	Lomholdt, O. & Pulawski, W.J. 2010. A revision of the wasp genus Sericophorus F. Smith, 1851 (Hymenoptera: Apoidea: Crabronidae). Proceedings of the California Academy of Sciences Series 4 61: 1-234	Article in Journal	USA	no	Proceedings of the California Academy of Sciences	na	na
Apoidea	Hymenoptera	Sericophorus		glaucus		Valid	Species	Y	Pulawski in Lomholdt & Pulawski	2010	Pulawski, W.J. in Lomholdt, O. & Pulawski, W.J.	1	yes	1784	Lomholdt, O. & Pulawski, W.J. 2010. A revision of the wasp genus Sericophorus F. Smith, 1851 (Hymenoptera: Apoidea: Crabronidae). Proceedings of the California Academy of Sciences Series 4 61: 1-234	Article in Journal	USA	no	Proceedings of the California Academy of Sciences	na	na
Apoidea	Hymenoptera	Sericophorus		glossatus		Valid	Species	Y	Lomholdt in Lomholdt & Pulawski	2010	Lomholdt, O. in Lomholdt, O. & Pulawski, W.J.	1	yes	1784	Lomholdt, O. & Pulawski, W.J. 2010. A revision of the wasp genus Sericophorus F. Smith, 1851 (Hymenoptera: Apoidea: Crabronidae). Proceedings of the California Academy of Sciences Series 4 61: 1-234	Article in Journal	USA	no	Proceedings of the California Academy of Sciences	na	na
Apoidea	Hymenoptera	Sericophorus		glyptus		Valid	Species	Y	Pulawski in Lomholdt & Pulawski	2010	Pulawski, W.J. in Lomholdt, O. & Pulawski, W.J.	1	yes	1784	Lomholdt, O. & Pulawski, W.J. 2010. A revision of the wasp genus Sericophorus F. Smith, 1851 (Hymenoptera: Apoidea: Crabronidae). Proceedings of the California Academy of Sciences Series 4 61: 1-234	Article in Journal	USA	no	Proceedings of the California Academy of Sciences	na	na
Apoidea	Hymenoptera	Sericophorus		houstoni		Valid	Species	Y	Lomholdt in Lomholdt & Pulawski	2010	Lomholdt, O. in Lomholdt, O. & Pulawski, W.J.	1	yes	1784	Lomholdt, O. & Pulawski, W.J. 2010. A revision of the wasp genus Sericophorus F. Smith, 1851 (Hymenoptera: Apoidea: Crabronidae). Proceedings of the California Academy of Sciences Series 4 61: 1-234	Article in Journal	USA	no	Proceedings of the California Academy of Sciences	na	na
Apoidea	Hymenoptera	Sericophorus		karrathensis		Valid	Species	Y	Pulawski in Lomholdt & Pulawski	2010	Pulawski, W.J. in Lomholdt, O. & Pulawski, W.J.	1	yes	1784	Lomholdt, O. & Pulawski, W.J. 2010. A revision of the wasp genus Sericophorus F. Smith, 1851 (Hymenoptera: Apoidea: Crabronidae). Proceedings of the California Academy of Sciences Series 4 61: 1-234	Article in Journal	USA	no	Proceedings of the California Academy of Sciences	na	na
Apoidea	Hymenoptera	Sericophorus		kurandae		Valid	Species	Y	Pulawski in Lomholdt & Pulawski	2010	Pulawski, W.J. in Lomholdt, O. & Pulawski, W.J.	1	yes	1784	Lomholdt, O. & Pulawski, W.J. 2010. A revision of the wasp genus Sericophorus F. Smith, 1851 (Hymenoptera: Apoidea: Crabronidae). Proceedings of the California Academy of Sciences Series 4 61: 1-234	Article in Journal	USA	no	Proceedings of the California Academy of Sciences	na	na
Apoidea	Hymenoptera	Sericophorus		laticeps		Valid	Species	Y	Lomholdt in Lomholdt & Pulawski	2010	Lomholdt, O. in Lomholdt, O. & Pulawski, W.J.	1	yes	1784	Lomholdt, O. & Pulawski, W.J. 2010. A revision of the wasp genus Sericophorus F. Smith, 1851 (Hymenoptera: Apoidea: Crabronidae). Proceedings of the California Academy of Sciences Series 4 61: 1-234	Article in Journal	USA	no	Proceedings of the California Academy of Sciences	na	na
Apoidea	Hymenoptera	Sericophorus		lissonotus		Valid	Species	Y	Lomholdt in Lomholdt & Pulawski	2010	Lomholdt, O. in Lomholdt, O. & Pulawski, W.J.	1	yes	1784	Lomholdt, O. & Pulawski, W.J. 2010. A revision of the wasp genus Sericophorus F. Smith, 1851 (Hymenoptera: Apoidea: Crabronidae). Proceedings of the California Academy of Sciences Series 4 61: 1-234	Article in Journal	USA	no	Proceedings of the California Academy of Sciences	na	na
Apoidea	Hymenoptera	Sericophorus		maculatus		Valid	Species	Y	Pulawski in Lomholdt & Pulawski	2010	Pulawski, W.J. in Lomholdt, O. & Pulawski, W.J.	1	yes	1784	Lomholdt, O. & Pulawski, W.J. 2010. A revision of the wasp genus Sericophorus F. Smith, 1851 (Hymenoptera: Apoidea: Crabronidae). Proceedings of the California Academy of Sciences Series 4 61: 1-234	Article in Journal	USA	no	Proceedings of the California Academy of Sciences	na	na
Apoidea	Hymenoptera	Sericophorus		mandibularis		Valid	Species	Y	Lomholdt in Lomholdt & Pulawski	2010	Lomholdt, O. in Lomholdt, O. & Pulawski, W.J.	1	yes	1784	Lomholdt, O. & Pulawski, W.J. 2010. A revision of the wasp genus Sericophorus F. Smith, 1851 (Hymenoptera: Apoidea: Crabronidae). Proceedings of the California Academy of Sciences Series 4 61: 1-234	Article in Journal	USA	no	Proceedings of the California Academy of Sciences	na	na
Apoidea	Hymenoptera	Sericophorus		mesopleuralis		Valid	Species	Y	Pulawski in Lomholdt & Pulawski	2010	Pulawski, W.J. in Lomholdt, O. & Pulawski, W.J.	1	yes	1784	Lomholdt, O. & Pulawski, W.J. 2010. A revision of the wasp genus Sericophorus F. Smith, 1851 (Hymenoptera: Apoidea: Crabronidae). Proceedings of the California Academy of Sciences Series 4 61: 1-234	Article in Journal	USA	no	Proceedings of the California Academy of Sciences	na	na
Apoidea	Hymenoptera	Sericophorus		mimus		Valid	Species	Y	Pulawski in Lomholdt & Pulawski	2010	Pulawski, W.J. in Lomholdt, O. & Pulawski, W.J.	1	yes	1784	Lomholdt, O. & Pulawski, W.J. 2010. A revision of the wasp genus Sericophorus F. Smith, 1851 (Hymenoptera: Apoidea: Crabronidae). Proceedings of the California Academy of Sciences Series 4 61: 1-234	Article in Journal	USA	no	Proceedings of the California Academy of Sciences	na	na
Apoidea	Hymenoptera	Sericophorus		minys		Valid	Species	Y	Pulawski in Lomholdt & Pulawski	2010	Pulawski, W.J. in Lomholdt, O. & Pulawski, W.J.	1	yes	1784	Lomholdt, O. & Pulawski, W.J. 2010. A revision of the wasp genus Sericophorus F. Smith, 1851 (Hymenoptera: Apoidea: Crabronidae). Proceedings of the California Academy of Sciences Series 4 61: 1-234	Article in Journal	USA	no	Proceedings of the California Academy of Sciences	na	na
Apoidea	Hymenoptera	Sericophorus		multipictus		Valid	Species	Y	Pulawski in Lomholdt & Pulawski	2010	Pulawski, W.J. in Lomholdt, O. & Pulawski, W.J.	1	yes	1784	Lomholdt, O. & Pulawski, W.J. 2010. A revision of the wasp genus Sericophorus F. Smith, 1851 (Hymenoptera: Apoidea: Crabronidae). Proceedings of the California Academy of Sciences Series 4 61: 1-234	Article in Journal	USA	no	Proceedings of the California Academy of Sciences	na	na
Apoidea	Hymenoptera	Sericophorus		nasicornis		Valid	Species	Y	Lomholdt in Lomholdt & Pulawski	2010	Lomholdt, O. in Lomholdt, O. & Pulawski, W.J.	1	yes	1784	Lomholdt, O. & Pulawski, W.J. 2010. A revision of the wasp genus Sericophorus F. Smith, 1851 (Hymenoptera: Apoidea: Crabronidae). Proceedings of the California Academy of Sciences Series 4 61: 1-234	Article in Journal	USA	no	Proceedings of the California Academy of Sciences	na	na
Apoidea	Hymenoptera	Sericophorus		nasutus		Valid	Species	Y	Pulawski in Lomholdt & Pulawski	2010	Pulawski, W.J. in Lomholdt, O. & Pulawski, W.J.	1	yes	1784	Lomholdt, O. & Pulawski, W.J. 2010. A revision of the wasp genus Sericophorus F. Smith, 1851 (Hymenoptera: Apoidea: Crabronidae). Proceedings of the California Academy of Sciences Series 4 61: 1-234	Article in Journal	USA	no	Proceedings of the California Academy of Sciences	na	na
Apoidea	Hymenoptera	Sericophorus		nigrescens		Valid	Species	Y	Lomholdt in Lomholdt & Pulawski	2010	Lomholdt, O. in Lomholdt, O. & Pulawski, W.J.	1	yes	1784	Lomholdt, O. & Pulawski, W.J. 2010. A revision of the wasp genus Sericophorus F. Smith, 1851 (Hymenoptera: Apoidea: Crabronidae). Proceedings of the California Academy of Sciences Series 4 61: 1-234	Article in Journal	USA	no	Proceedings of the California Academy of Sciences	na	na
Apoidea	Hymenoptera	Sericophorus		nigripes		Valid	Species	Y	Lomholdt in Lomholdt & Pulawski	2010	Lomholdt, O. in Lomholdt, O. & Pulawski, W.J.	1	yes	1784	Lomholdt, O. & Pulawski, W.J. 2010. A revision of the wasp genus Sericophorus F. Smith, 1851 (Hymenoptera: Apoidea: Crabronidae). Proceedings of the California Academy of Sciences Series 4 61: 1-234	Article in Journal	USA	no	Proceedings of the California Academy of Sciences	na	na
Apoidea	Hymenoptera	Sericophorus		nitidus		Valid	Species	Y	Pulawski in Lomholdt & Pulawski	2010	Pulawski, W.J. in Lomholdt, O. & Pulawski, W.J.	1	yes	1784	Lomholdt, O. & Pulawski, W.J. 2010. A revision of the wasp genus Sericophorus F. Smith, 1851 (Hymenoptera: Apoidea: Crabronidae). Proceedings of the California Academy of Sciences Series 4 61: 1-234	Article in Journal	USA	no	Proceedings of the California Academy of Sciences	na	na
Apoidea	Hymenoptera	Sericophorus		pectinatus		Valid	Species	Y	Lomholdt in Lomholdt & Pulawski	2010	Lomholdt, O. in Lomholdt, O. & Pulawski, W.J.	1	yes	1784	Lomholdt, O. & Pulawski, W.J. 2010. A revision of the wasp genus Sericophorus F. Smith, 1851 (Hymenoptera: Apoidea: Crabronidae). Proceedings of the California Academy of Sciences Series 4 61: 1-234	Article in Journal	USA	no	Proceedings of the California Academy of Sciences	na	na
Apoidea	Hymenoptera	Sericophorus		politus		Valid	Species	Y	Lomholdt in Lomholdt & Pulawski	2010	Lomholdt, O. in Lomholdt, O. & Pulawski, W.J.	1	yes	1784	Lomholdt, O. & Pulawski, W.J. 2010. A revision of the wasp genus Sericophorus F. Smith, 1851 (Hymenoptera: Apoidea: Crabronidae). Proceedings of the California Academy of Sciences Series 4 61: 1-234	Article in Journal	USA	no	Proceedings of the California Academy of Sciences	na	na
Apoidea	Hymenoptera	Sericophorus		protrudens		Valid	Species	Y	Lomholdt in Lomholdt & Pulawski	2010	Lomholdt, O. in Lomholdt, O. & Pulawski, W.J.	1	yes	1784	Lomholdt, O. & Pulawski, W.J. 2010. A revision of the wasp genus Sericophorus F. Smith, 1851 (Hymenoptera: Apoidea: Crabronidae). Proceedings of the California Academy of Sciences Series 4 61: 1-234	Article in Journal	USA	no	Proceedings of the California Academy of Sciences	na	na
Apoidea	Hymenoptera	Sericophorus		punctum		Valid	Species	Y	Lomholdt in Lomholdt & Pulawski	2010	Lomholdt, O. in Lomholdt, O. & Pulawski, W.J.	1	yes	1784	Lomholdt, O. & Pulawski, W.J. 2010. A revision of the wasp genus Sericophorus F. Smith, 1851 (Hymenoptera: Apoidea: Crabronidae). Proceedings of the California Academy of Sciences Series 4 61: 1-234	Article in Journal	USA	no	Proceedings of the California Academy of Sciences	na	na
Apoidea	Hymenoptera	Sericophorus		riparius		Valid	Species	Y	Pulawski in Lomholdt & Pulawski	2010	Pulawski, W.J. in Lomholdt, O. & Pulawski, W.J.	1	yes	1784	Lomholdt, O. & Pulawski, W.J. 2010. A revision of the wasp genus Sericophorus F. Smith, 1851 (Hymenoptera: Apoidea: Crabronidae). Proceedings of the California Academy of Sciences Series 4 61: 1-234	Article in Journal	USA	no	Proceedings of the California Academy of Sciences	na	na
Apoidea	Hymenoptera	Sericophorus		ruficollis		Valid	Species	Y	Lomholdt in Lomholdt & Pulawski	2010	Lomholdt, O. in Lomholdt, O. & Pulawski, W.J.	1	yes	1784	Lomholdt, O. & Pulawski, W.J. 2010. A revision of the wasp genus Sericophorus F. Smith, 1851 (Hymenoptera: Apoidea: Crabronidae). Proceedings of the California Academy of Sciences Series 4 61: 1-234	Article in Journal	USA	no	Proceedings of the California Academy of Sciences	na	na
Apoidea	Hymenoptera	Sericophorus		rufithorax		Valid	Species	Y	Lomholdt in Lomholdt & Pulawski	2010	Lomholdt, O. in Lomholdt, O. & Pulawski, W.J.	1	yes	1784	Lomholdt, O. & Pulawski, W.J. 2010. A revision of the wasp genus Sericophorus F. Smith, 1851 (Hymenoptera: Apoidea: Crabronidae). Proceedings of the California Academy of Sciences Series 4 61: 1-234	Article in Journal	USA	no	Proceedings of the California Academy of Sciences	na	na
Apoidea	Hymenoptera	Sericophorus		rufus		Valid	Species	Y	Pulawski in Lomholdt & Pulawski	2010	Pulawski, W.J. in Lomholdt, O. & Pulawski, W.J.	1	yes	1784	Lomholdt, O. & Pulawski, W.J. 2010. A revision of the wasp genus Sericophorus F. Smith, 1851 (Hymenoptera: Apoidea: Crabronidae). Proceedings of the California Academy of Sciences Series 4 61: 1-234	Article in Journal	USA	no	Proceedings of the California Academy of Sciences	na	na
Apoidea	Hymenoptera	Sericophorus		sabulosus		Valid	Species	Y	Lomholdt in Lomholdt & Pulawski	2010	Lomholdt, O. in Lomholdt, O. & Pulawski, W.J.	1	yes	1784	Lomholdt, O. & Pulawski, W.J. 2010. A revision of the wasp genus Sericophorus F. Smith, 1851 (Hymenoptera: Apoidea: Crabronidae). Proceedings of the California Academy of Sciences Series 4 61: 1-234	Article in Journal	USA	no	Proceedings of the California Academy of Sciences	na	na
Apoidea	Hymenoptera	Sericophorus		sanguineus		Valid	Species	Y	Lomholdt in Lomholdt & Pulawski	2010	Lomholdt, O. in Lomholdt, O. & Pulawski, W.J.	1	yes	1784	Lomholdt, O. & Pulawski, W.J. 2010. A revision of the wasp genus Sericophorus F. Smith, 1851 (Hymenoptera: Apoidea: Crabronidae). Proceedings of the California Academy of Sciences Series 4 61: 1-234	Article in Journal	USA	no	Proceedings of the California Academy of Sciences	na	na
Apoidea	Hymenoptera	Sericophorus		scintillans		Valid	Species	Y	Pulawski in Lomholdt & Pulawski	2010	Pulawski, W.J. in Lomholdt, O. & Pulawski, W.J.	1	yes	1784	Lomholdt, O. & Pulawski, W.J. 2010. A revision of the wasp genus Sericophorus F. Smith, 1851 (Hymenoptera: Apoidea: Crabronidae). Proceedings of the California Academy of Sciences Series 4 61: 1-234	Article in Journal	USA	no	Proceedings of the California Academy of Sciences	na	na
Apoidea	Hymenoptera	Sericophorus		setulosus		Valid	Species	Y	Lomholdt in Lomholdt & Pulawski	2010	Lomholdt, O. in Lomholdt, O. & Pulawski, W.J.	1	yes	1784	Lomholdt, O. & Pulawski, W.J. 2010. A revision of the wasp genus Sericophorus F. Smith, 1851 (Hymenoptera: Apoidea: Crabronidae). Proceedings of the California Academy of Sciences Series 4 61: 1-234	Article in Journal	USA	no	Proceedings of the California Academy of Sciences	na	na
Apoidea	Hymenoptera	Sericophorus		sparsus		Valid	Species	Y	Pulawski in Lomholdt & Pulawski	2010	Pulawski, W.J. in Lomholdt, O. & Pulawski, W.J.	1	yes	1784	Lomholdt, O. & Pulawski, W.J. 2010. A revision of the wasp genus Sericophorus F. Smith, 1851 (Hymenoptera: Apoidea: Crabronidae). Proceedings of the California Academy of Sciences Series 4 61: 1-234	Article in Journal	USA	no	Proceedings of the California Academy of Sciences	na	na
Apoidea	Hymenoptera	Sericophorus		tibialis		Valid	Species	Y	Pulawski in Lomholdt & Pulawski	2010	Pulawski, W.J. in Lomholdt, O. & Pulawski, W.J.	1	yes	1784	Lomholdt, O. & Pulawski, W.J. 2010. A revision of the wasp genus Sericophorus F. Smith, 1851 (Hymenoptera: Apoidea: Crabronidae). Proceedings of the California Academy of Sciences Series 4 61: 1-234	Article in Journal	USA	no	Proceedings of the California Academy of Sciences	na	na
Apoidea	Hymenoptera	Sericophorus		triangularis		Valid	Species	Y	Lomholdt in Lomholdt & Pulawski	2010	Lomholdt, O. in Lomholdt, O. & Pulawski, W.J.	1	yes	1784	Lomholdt, O. & Pulawski, W.J. 2010. A revision of the wasp genus Sericophorus F. Smith, 1851 (Hymenoptera: Apoidea: Crabronidae). Proceedings of the California Academy of Sciences Series 4 61: 1-234	Article in Journal	USA	no	Proceedings of the California Academy of Sciences	na	na
Apoidea	Hymenoptera	Sericophorus		trichocephalus		Valid	Species	Y	Pulawski in Lomholdt & Pulawski	2010	Pulawski, W.J. in Lomholdt, O. & Pulawski, W.J.	1	yes	1784	Lomholdt, O. & Pulawski, W.J. 2010. A revision of the wasp genus Sericophorus F. Smith, 1851 (Hymenoptera: Apoidea: Crabronidae). Proceedings of the California Academy of Sciences Series 4 61: 1-234	Article in Journal	USA	no	Proceedings of the California Academy of Sciences	na	na
Apoidea	Hymenoptera	Sericophorus		vicarius		Valid	Species	Y	Lomholdt in Lomholdt & Pulawski	2010	Lomholdt, O. in Lomholdt, O. & Pulawski, W.J.	1	yes	1784	Lomholdt, O. & Pulawski, W.J. 2010. A revision of the wasp genus Sericophorus F. Smith, 1851 (Hymenoptera: Apoidea: Crabronidae). Proceedings of the California Academy of Sciences Series 4 61: 1-234	Article in Journal	USA	no	Proceedings of the California Academy of Sciences	na	na
Apoidea	Hymenoptera	Sericophorus		viridescens		Valid	Species	Y	Lomholdt in Lomholdt & Pulawski	2010	Lomholdt, O. in Lomholdt, O. & Pulawski, W.J.	1	yes	1784	Lomholdt, O. & Pulawski, W.J. 2010. A revision of the wasp genus Sericophorus F. Smith, 1851 (Hymenoptera: Apoidea: Crabronidae). Proceedings of the California Academy of Sciences Series 4 61: 1-234	Article in Journal	USA	no	Proceedings of the California Academy of Sciences	na	na
Apoidea	Hymenoptera	Sericophorus		wheeleri		Valid	Species	Y	Lomholdt in Lomholdt & Pulawski	2010	Lomholdt, O. in Lomholdt, O. & Pulawski, W.J.	1	yes	1784	Lomholdt, O. & Pulawski, W.J. 2010. A revision of the wasp genus Sericophorus F. Smith, 1851 (Hymenoptera: Apoidea: Crabronidae). Proceedings of the California Academy of Sciences Series 4 61: 1-234	Article in Journal	USA	no	Proceedings of the California Academy of Sciences	na	na
Apoidea	Hymenoptera	Sericophorus		xanthogaster		Valid	Species	Y	Lomholdt in Lomholdt & Pulawski	2010	Lomholdt, O. in Lomholdt, O. & Pulawski, W.J.	1	yes	1784	Lomholdt, O. & Pulawski, W.J. 2010. A revision of the wasp genus Sericophorus F. Smith, 1851 (Hymenoptera: Apoidea: Crabronidae). Proceedings of the California Academy of Sciences Series 4 61: 1-234	Article in Journal	USA	no	Proceedings of the California Academy of Sciences	na	na
Apoidea	Hymenoptera	Sericophorus		xanthomelas		Valid	Species	Y	Pulawski in Lomholdt & Pulawski	2010	Pulawski, W.J. in Lomholdt, O. & Pulawski, W.J.	1	yes	1784	Lomholdt, O. & Pulawski, W.J. 2010. A revision of the wasp genus Sericophorus F. Smith, 1851 (Hymenoptera: Apoidea: Crabronidae). Proceedings of the California Academy of Sciences Series 4 61: 1-234	Article in Journal	USA	no	Proceedings of the California Academy of Sciences	na	na
Apoidea	Hymenoptera	Sphodrotes		acuticollis		Valid	Species	Y	Lomholdt	1983	Lomholdt, O.	1	no	1783	Lomholdt, O. 1983. A revision of Sphodrotes Kohl, 1889 (Hymenoptera, Sphecoidea, Larridae). Steenstrupia 9: 85-116	Article in Journal	Denmark	no	Steenstrupia	na	na
Apoidea	Hymenoptera	Sphodrotes		dearmata		Valid	Species	Y	Lomholdt	1983	Lomholdt, O.	1	no	1783	Lomholdt, O. 1983. A revision of Sphodrotes Kohl, 1889 (Hymenoptera, Sphecoidea, Larridae). Steenstrupia 9: 85-116	Article in Journal	Denmark	no	Steenstrupia	na	na
Apoidea	Hymenoptera	Sphodrotes		nemoralis		Valid	Species	Y	Evans	1973	Evans, H.E.	1	no	938	Evans, H.E. 1973. Observations on the nests and prey of Sphodrotes nemoralis sp.n. (Hymenoptera: Sphecidae). Journal of the Australian Entomological Society 12: 311-314	Article in Journal	Australia	yes	Journal of the Australian Entomological Society	society	AustEntSoc
Apoidea	Hymenoptera	Sphodrotes		occidentalis		Valid	Species	Y	Lomholdt	1983	Lomholdt, O.	1	no	1783	Lomholdt, O. 1983. A revision of Sphodrotes Kohl, 1889 (Hymenoptera, Sphecoidea, Larridae). Steenstrupia 9: 85-116	Article in Journal	Denmark	no	Steenstrupia	na	na
Apoidea	Hymenoptera	Sphodrotes		ordinaria		Valid	Species	Y	Lomholdt	1983	Lomholdt, O.	1	no	1783	Lomholdt, O. 1983. A revision of Sphodrotes Kohl, 1889 (Hymenoptera, Sphecoidea, Larridae). Steenstrupia 9: 85-116	Article in Journal	Denmark	no	Steenstrupia	na	na
Apoidea	Hymenoptera	Sphodrotes		prima		Valid	Species	Y	Lomholdt	1983	Lomholdt, O.	1	no	1783	Lomholdt, O. 1983. A revision of Sphodrotes Kohl, 1889 (Hymenoptera, Sphecoidea, Larridae). Steenstrupia 9: 85-116	Article in Journal	Denmark	no	Steenstrupia	na	na
Apoidea	Hymenoptera	Sphodrotes		rubra		Valid	Species	Y	Lomholdt	1983	Lomholdt, O.	1	no	1783	Lomholdt, O. 1983. A revision of Sphodrotes Kohl, 1889 (Hymenoptera, Sphecoidea, Larridae). Steenstrupia 9: 85-116	Article in Journal	Denmark	no	Steenstrupia	na	na
Apoidea	Hymenoptera	Sphodrotes		splendens		Valid	Species	Y	Lomholdt	1983	Lomholdt, O.	1	no	1783	Lomholdt, O. 1983. A revision of Sphodrotes Kohl, 1889 (Hymenoptera, Sphecoidea, Larridae). Steenstrupia 9: 85-116	Article in Journal	Denmark	no	Steenstrupia	na	na
Apoidea	Hymenoptera	Spilomena		subterranea		Valid	Species	Y	McCorquodale & Naumann	1988	McCorquodale, D.B. & Naumann, I.D.	2	no	1966	McCorquodale, D.B. & Naumann, I.D. 1988. A new Australian species of communal ground nesting wasp, in the genus Spilomena Shuckard (Hymenoptera: Sphecidae: Pemphredoninae). Journal of the Australian Entomological Society 27: 221-231	Article in Journal	Australia	yes	Journal of the Australian Entomological Society	society	AustEntSoc
Apoidea	Hymenoptera	Stenohesma		nomadiformis		Valid	Species	Y	Michener	1965	Michener, C.D.	1	no	2014	Michener, C.D. 1965. A classification of the bees of the Australian and South Pacific regions. Bulletin of the American Museum of Natural History 130: 1-362 [Date published 31/12/1965]	Article in Journal	USA	no	Bulletin of the American Museum of Natural History	na	na
Apoidea	Hymenoptera	Tachysphex		aborigenus		Valid	Species	Y	Pulawski	1977	Pulawski, W.	1	no	2486	Pulawski, W. 1977. A synopsis of Tachysphex Kohl (Hym., Sphecidae) of Australia and Oceania. Polskie Pismo Entomologiczne 47: 203-332	Article in Journal	Poland	yes	Polskie Pismo Entomologiczne	na	na
Apoidea	Hymenoptera	Tachysphex		brevicornis		Valid	Species	Y	Pulawski	1977	Pulawski, W.	1	no	2486	Pulawski, W. 1977. A synopsis of Tachysphex Kohl (Hym., Sphecidae) of Australia and Oceania. Polskie Pismo Entomologiczne 47: 203-332	Article in Journal	Poland	yes	Polskie Pismo Entomologiczne	na	na
Apoidea	Hymenoptera	Tachysphex		buccalis		Valid	Species	Y	Pulawski	1977	Pulawski, W.	1	no	2486	Pulawski, W. 1977. A synopsis of Tachysphex Kohl (Hym., Sphecidae) of Australia and Oceania. Polskie Pismo Entomologiczne 47: 203-332	Article in Journal	Poland	yes	Polskie Pismo Entomologiczne	na	na
Apoidea	Hymenoptera	Tachysphex		circulans		Valid	Species	Y	Pulawski	1977	Pulawski, W.	1	no	2486	Pulawski, W. 1977. A synopsis of Tachysphex Kohl (Hym., Sphecidae) of Australia and Oceania. Polskie Pismo Entomologiczne 47: 203-332	Article in Journal	Poland	yes	Polskie Pismo Entomologiczne	na	na
Apoidea	Hymenoptera	Tachysphex		contrarius		Valid	Species	Y	Pulawski	1977	Pulawski, W.	1	no	2486	Pulawski, W. 1977. A synopsis of Tachysphex Kohl (Hym., Sphecidae) of Australia and Oceania. Polskie Pismo Entomologiczne 47: 203-332	Article in Journal	Poland	yes	Polskie Pismo Entomologiczne	na	na
Apoidea	Hymenoptera	Tachysphex		eucalypticus		Valid	Species	Y	Pulawski	1977	Pulawski, W.	1	no	2486	Pulawski, W. 1977. A synopsis of Tachysphex Kohl (Hym., Sphecidae) of Australia and Oceania. Polskie Pismo Entomologiczne 47: 203-332	Article in Journal	Poland	yes	Polskie Pismo Entomologiczne	na	na
Apoidea	Hymenoptera	Tachysphex		fanuiensis	corallinus	Valid	Subspecies	Y	Pulawski	1977	Pulawski, W.	1	no	2486	Pulawski, W. 1977. A synopsis of Tachysphex Kohl (Hym., Sphecidae) of Australia and Oceania. Polskie Pismo Entomologiczne 47: 203-332	Article in Journal	Poland	yes	Polskie Pismo Entomologiczne	na	na
Apoidea	Hymenoptera	Tachysphex		fanuiensis	howeanus	Valid	Subspecies	Y	Pulawski	1977	Pulawski, W.	1	no	2486	Pulawski, W. 1977. A synopsis of Tachysphex Kohl (Hym., Sphecidae) of Australia and Oceania. Polskie Pismo Entomologiczne 47: 203-332	Article in Journal	Poland	yes	Polskie Pismo Entomologiczne	na	na
Apoidea	Hymenoptera	Tachysphex		foliaceus		Valid	Species	Y	Pulawski	1977	Pulawski, W.	1	no	2486	Pulawski, W. 1977. A synopsis of Tachysphex Kohl (Hym., Sphecidae) of Australia and Oceania. Polskie Pismo Entomologiczne 47: 203-332	Article in Journal	Poland	yes	Polskie Pismo Entomologiczne	na	na
Apoidea	Hymenoptera	Tachysphex		galeatus		Valid	Species	Y	Pulawski	1977	Pulawski, W.	1	no	2486	Pulawski, W. 1977. A synopsis of Tachysphex Kohl (Hym., Sphecidae) of Australia and Oceania. Polskie Pismo Entomologiczne 47: 203-332	Article in Journal	Poland	yes	Polskie Pismo Entomologiczne	na	na
Apoidea	Hymenoptera	Tachysphex		maculipennis		Valid	Species	Y	Pulawski	1977	Pulawski, W.	1	no	2486	Pulawski, W. 1977. A synopsis of Tachysphex Kohl (Hym., Sphecidae) of Australia and Oceania. Polskie Pismo Entomologiczne 47: 203-332	Article in Journal	Poland	yes	Polskie Pismo Entomologiczne	na	na
Apoidea	Hymenoptera	Tachysphex		maximus		Valid	Species	Y	Pulawski	1977	Pulawski, W.	1	no	2486	Pulawski, W. 1977. A synopsis of Tachysphex Kohl (Hym., Sphecidae) of Australia and Oceania. Polskie Pismo Entomologiczne 47: 203-332	Article in Journal	Poland	yes	Polskie Pismo Entomologiczne	na	na
Apoidea	Hymenoptera	Tachysphex		multifasciatus		Valid	Species	Y	Pulawski in Evans, Matthews & Pulawski, 1976	1976	Pulawski, W. in Evans, H.E., Matthews, R.W. & Pulawski, W.	1	yes	953	Evans, H.E., Matthews, R.W. & Pulawski, W. 1976. Notes on the nests and prey of four Australian species of Tachysphex Kohl, with description of a new species (Hymenoptera: Sphecidae). Journal of the Australian Entomological Society 15: 441-445	Article in Journal	Australia	yes	Journal of the Australian Entomological Society	society	AustEntSoc
Apoidea	Hymenoptera	Tachysphex		nefarius		Valid	Species	Y	Pulawski	1977	Pulawski, W.	1	no	2486	Pulawski, W. 1977. A synopsis of Tachysphex Kohl (Hym., Sphecidae) of Australia and Oceania. Polskie Pismo Entomologiczne 47: 203-332	Article in Journal	Poland	yes	Polskie Pismo Entomologiczne	na	na
Apoidea	Hymenoptera	Tachysphex		paucispina		Valid	Species	Y	Pulawski	1977	Pulawski, W.	1	no	2486	Pulawski, W. 1977. A synopsis of Tachysphex Kohl (Hym., Sphecidae) of Australia and Oceania. Polskie Pismo Entomologiczne 47: 203-332	Article in Journal	Poland	yes	Polskie Pismo Entomologiczne	na	na
Apoidea	Hymenoptera	Tachysphex		platypus		Valid	Species	Y	Pulawski	1977	Pulawski, W.	1	no	2486	Pulawski, W. 1977. A synopsis of Tachysphex Kohl (Hym., Sphecidae) of Australia and Oceania. Polskie Pismo Entomologiczne 47: 203-332	Article in Journal	Poland	yes	Polskie Pismo Entomologiczne	na	na
Apoidea	Hymenoptera	Tachysphex		pleuralis		Valid	Species	Y	Pulawski	1977	Pulawski, W.	1	no	2486	Pulawski, W. 1977. A synopsis of Tachysphex Kohl (Hym., Sphecidae) of Australia and Oceania. Polskie Pismo Entomologiczne 47: 203-332	Article in Journal	Poland	yes	Polskie Pismo Entomologiczne	na	na
Apoidea	Hymenoptera	Tachysphex		politus		Valid	Species	Y	Pulawski	1977	Pulawski, W.	1	no	2486	Pulawski, W. 1977. A synopsis of Tachysphex Kohl (Hym., Sphecidae) of Australia and Oceania. Polskie Pismo Entomologiczne 47: 203-332	Article in Journal	Poland	yes	Polskie Pismo Entomologiczne	na	na
Apoidea	Hymenoptera	Tachysphex		proteus		Valid	Species	Y	Pulawski	1977	Pulawski, W.	1	no	2486	Pulawski, W. 1977. A synopsis of Tachysphex Kohl (Hym., Sphecidae) of Australia and Oceania. Polskie Pismo Entomologiczne 47: 203-332	Article in Journal	Poland	yes	Polskie Pismo Entomologiczne	na	na
Apoidea	Hymenoptera	Tachysphex		pubescens		Valid	Species	Y	Pulawski	1977	Pulawski, W.	1	no	2486	Pulawski, W. 1977. A synopsis of Tachysphex Kohl (Hym., Sphecidae) of Australia and Oceania. Polskie Pismo Entomologiczne 47: 203-332	Article in Journal	Poland	yes	Polskie Pismo Entomologiczne	na	na
Apoidea	Hymenoptera	Tachysphex		rhynchocephalus		Valid	Species	Y	Pulawski	1977	Pulawski, W.	1	no	2486	Pulawski, W. 1977. A synopsis of Tachysphex Kohl (Hym., Sphecidae) of Australia and Oceania. Polskie Pismo Entomologiczne 47: 203-332	Article in Journal	Poland	yes	Polskie Pismo Entomologiczne	na	na
Apoidea	Hymenoptera	Tachysphex		tenuisculptus		Valid	Species	Y	Pulawski	1977	Pulawski, W.	1	no	2486	Pulawski, W. 1977. A synopsis of Tachysphex Kohl (Hym., Sphecidae) of Australia and Oceania. Polskie Pismo Entomologiczne 47: 203-332	Article in Journal	Poland	yes	Polskie Pismo Entomologiczne	na	na
Apoidea	Hymenoptera	Tachysphex		vardyi		Valid	Species	Y	Pulawski	1977	Pulawski, W.	1	no	2486	Pulawski, W. 1977. A synopsis of Tachysphex Kohl (Hym., Sphecidae) of Australia and Oceania. Polskie Pismo Entomologiczne 47: 203-332	Article in Journal	Poland	yes	Polskie Pismo Entomologiczne	na	na
Apoidea	Hymenoptera	Tachysphex		vividus		Valid	Species	Y	Pulawski	1977	Pulawski, W.	1	no	2486	Pulawski, W. 1977. A synopsis of Tachysphex Kohl (Hym., Sphecidae) of Australia and Oceania. Polskie Pismo Entomologiczne 47: 203-332	Article in Journal	Poland	yes	Polskie Pismo Entomologiczne	na	na
Apoidea	Hymenoptera	Tachytes		codonocarpi		Valid	Species	Y	Pulawski	1975	Pulawski, W.	1	no	2485	Pulawski, W. 1975. Two new species of Larrinae (Hym., Sphecidae) from Australia and Tunisia. Polskie Pismo Entomologiczne 45: 165-169	Article in Journal	Poland	yes	Polskie Pismo Entomologiczne	na	na
Apoidea	Hymenoptera	Tetragonula		davenporti		Valid	Species	N	Franck in Franck, Cameron, Good, Rasplus & Oldroyd	2004	Franck, P. in Franck, P., Cameron, E., Good, G., Rasplus, J.-Y. & Oldroyd, B.P.	1	yes	1060	Franck, P., Cameron, E., Good, G., Rasplus, J.-Y. & Oldroyd, B.P. 2004. Nest architecture and genetic differentiation in a species complex of Australian stingless bees. Molecular Ecology 13: 2317-2331	Article in Journal	UK	no	Molecular Ecology	na	na
Apoidea	Hymenoptera	Thyreus		sicarius		Valid	Species	Y	Lieftinck	1962	Lieftinck, M.A.	1	no	1740	Lieftinck, M.A. 1962. Revision of the Indo-Australian species of the genus Thyreus Panzer (=Crocisa Jurine) (Hym., Apoidea, Anthophoridae). Part 3. Oriental and Australian species. Zoologische Verhandelingen (Leiden) 53: 1-212 [Date published 31/12/1962]	Article in Journal	Netherlands	no	Zoologische Verhandelingen	na	na
Apoidea	Hymenoptera	Trichocolletes		burnsi		Valid	Species	Y	Michener	1965	Michener, C.D.	1	no	2014	Michener, C.D. 1965. A classification of the bees of the Australian and South Pacific regions. Bulletin of the American Museum of Natural History 130: 1-362 [Date published 31/12/1965]	Article in Journal	USA	no	Bulletin of the American Museum of Natural History	na	na
Apoidea	Hymenoptera	Trichocolletes		eremophilae		Valid	Species	Y	Houston	1990	Houston, T.F.	1	no	1342	Houston, T.F. 1990. Descriptions of new paracolletine bees associated with flowers of Eremophila (Hymenoptera: Colletidae). Records of the Western Australian Museum 14: 583-621 [Date published 31/12/1990]	Article in Journal	Australia	no	Records of the Western Australian Museum	museum	WAMus
Apoidea	Hymenoptera	Trichocolletes		multipectinatus		Valid	Species	Y	Houston	1990	Houston, T.F.	1	no	1342	Houston, T.F. 1990. Descriptions of new paracolletine bees associated with flowers of Eremophila (Hymenoptera: Colletidae). Records of the Western Australian Museum 14: 583-621 [Date published 31/12/1990]	Article in Journal	Australia	no	Records of the Western Australian Museum	museum	WAMus
Apoidea	Hymenoptera	Trichocolletes		pulcherrimus		Valid	Species	Y	Michener	1965	Michener, C.D.	1	no	2014	Michener, C.D. 1965. A classification of the bees of the Australian and South Pacific regions. Bulletin of the American Museum of Natural History 130: 1-362 [Date published 31/12/1965]	Article in Journal	USA	no	Bulletin of the American Museum of Natural History	na	na
Apoidea	Hymenoptera	Trypoxylon		albitarsatum	huonense	Valid	Subspecies	Y	Tsuneki	1977	Tsuneki, K.	1	no	3124	Tsuneki, K. 1977. Some Trypoxylon species from the southwestern Pacific (Hymenoptera, Sphecidae, Larrinae). Special Publication, Japan Hymenopterists Association 6: 20 pp.	Article in Journal	Japan	yes	Special Publication, Japan Hymenopterists Association	na	na
Apoidea	Hymenoptera	Trypoxylon		albitarsatum	albitarsatum	Valid	Subspecies	Y	Tsuneki	1977	Tsuneki, K.	1	no	3124	Tsuneki, K. 1977. Some Trypoxylon species from the southwestern Pacific (Hymenoptera, Sphecidae, Larrinae). Special Publication, Japan Hymenopterists Association 6: 20 pp.	Article in Journal	Japan	yes	Special Publication, Japan Hymenopterists Association	na	na
Apoidea	Hymenoptera	Trypoxylon		bituberculatum		Valid	Species	Y	Tsuneki	1977	Tsuneki, K.	1	no	3124	Tsuneki, K. 1977. Some Trypoxylon species from the southwestern Pacific (Hymenoptera, Sphecidae, Larrinae). Special Publication, Japan Hymenopterists Association 6: 20 pp.	Article in Journal	Japan	yes	Special Publication, Japan Hymenopterists Association	na	na
Apoidea	Hymenoptera	Trypoxylon		flavipes		Valid	Species	Y	Tsuneki	1979	Tsuneki, K.	1	no	3125	Tsuneki, K. 1979. Studies on the genus Trypoxylon Latreille of the Oriental and Australian regions (Hymenoptera, Sphecidae). III. Species from the Indian subcontinent including southeast Asia. Special Publication, Japan Hymenopterists Association 9: 178 pp.	Article in Journal	Japan	yes	Special Publication, Japan Hymenopterists Association	na	na
Apoidea	Hymenoptera	Trypoxylon		huonense		Synonym of Trypoxylon albitarsatum huonense Tsuneki, 1977	Species	Y	Tsuneki	1977	Tsuneki, K.	1	no	3124	Tsuneki, K. 1977. Some Trypoxylon species from the southwestern Pacific (Hymenoptera, Sphecidae, Larrinae). Special Publication, Japan Hymenopterists Association 6: 20 pp.	Article in Journal	Japan	yes	Special Publication, Japan Hymenopterists Association	na	na
Apoidea	Hymenoptera	Trypoxylon		lavongaianum		Synonym of Trypoxylon schmiedeknechti connexum Turner, 1908	Species	Y	Tsuneki	1977	Tsuneki, K.	1	no	3124	Tsuneki, K. 1977. Some Trypoxylon species from the southwestern Pacific (Hymenoptera, Sphecidae, Larrinae). Special Publication, Japan Hymenopterists Association 6: 20 pp.	Article in Journal	Japan	yes	Special Publication, Japan Hymenopterists Association	na	na
Apoidea	Hymenoptera	Trypoxylon		mindanaonis		Valid	Species	Y	Tsuneki	1976	Tsuneki, K.	1	no	3122	Tsuneki, K. 1976. Sphecoidea taken by the Noona Dan Expedition in the Philippine Islands (Insecta, Hymenoptera). Steenstrupia 4: 33-120	Article in Journal	Denmark	no	Steenstrupia	na	na
Apoidea	Hymenoptera	Trypoxylon		papuanum		Valid	Species	Y	Tsuneki	1977	Tsuneki, K.	1	no	3124	Tsuneki, K. 1977. Some Trypoxylon species from the southwestern Pacific (Hymenoptera, Sphecidae, Larrinae). Special Publication, Japan Hymenopterists Association 6: 20 pp.	Article in Journal	Japan	yes	Special Publication, Japan Hymenopterists Association	na	na
Apoidea	Hymenoptera	Tumidihesma		flaviceps		Valid	Species	Y	Exley	1996	Exley, E.M.	1	no	1001	Exley, E.M. 1996. Tumidihesma, a new genus of Australian bees (Hymenoptera: Colletidae: Euryglossinae). Australian Journal of Entomology 35(3): 253-255 [Date published August]	Article in Journal	Australia	yes	Australian Journal of Entomology	society	AustEntSoc
Apoidea	Hymenoptera	Tumidihesma		tridentata		Valid	Species	Y	Exley	1996	Exley, E.M.	1	no	1001	Exley, E.M. 1996. Tumidihesma, a new genus of Australian bees (Hymenoptera: Colletidae: Euryglossinae). Australian Journal of Entomology 35(3): 253-255 [Date published August]	Article in Journal	Australia	yes	Australian Journal of Entomology	society	AustEntSoc
Apoidea	Hymenoptera	Williamsita		bushiella		Valid	Species	Y	Leclercq	1974	Leclercq, J.	1	no	1714	Leclercq, J. 1974. Crabroniens d'Australie (Hymenoptera Sphecidae and Crabroninae). Bulletin et Annales de la Société Royale Belgique d'Entomologie 110: 37-57	Article in Journal	Belgium	yes	Bulletin et Annales de la Société Royale Belgique d'Entomologie	na	na
Apoidea	Hymenoptera	Williamsita		riekiella		Valid	Species	Y	Leclercq	1974	Leclercq, J.	1	no	1714	Leclercq, J. 1974. Crabroniens d'Australie (Hymenoptera Sphecidae and Crabroninae). Bulletin et Annales de la Société Royale Belgique d'Entomologie 110: 37-57	Article in Journal	Belgium	yes	Bulletin et Annales de la Société Royale Belgique d'Entomologie	na	na
Apoidea	Hymenoptera	Williamsita		vedetta		Valid	Species	Y	Leclercq	1974	Leclercq, J.	1	no	1714	Leclercq, J. 1974. Crabroniens d'Australie (Hymenoptera Sphecidae and Crabroninae). Bulletin et Annales de la Société Royale Belgique d'Entomologie 110: 37-57	Article in Journal	Belgium	yes	Bulletin et Annales de la Société Royale Belgique d'Entomologie	na	na
Apoidea	Hymenoptera	Xanthesma	Argohesma	clara		Valid	Species	N	Exley	1974	Exley, E.M.	1	no	987	Exley, E.M. 1974. A contribution to our knowledge of the bee fauna (Colletidae: Euryglossinae) of remote areas of Australia with descriptions of new species. Proceedings of the Royal Society of Queensland 85: 95-110 [Date published 31/12/1974]	Article in Journal	Australia	no	Proceedings of the Royal Society of Queensland	society	RoySocQld
Apoidea	Hymenoptera	Xanthesma	Argohesma	deloschema		Valid	Species	N	Exley	1969	Exley, E.M.	1	no	981	Exley, E.M. 1969. Argohesma--a new genus of Australian bees (Apoidea: Colletidae). Australian Journal of Zoology 17: 527-534 [Date published 31/12/1969]	Article in Journal	Australia	no	Australian Journal of Zoology	agency	CSIRO
Apoidea	Hymenoptera	Xanthesma	Argohesma	eremica		Valid	Species	N	Exley	1969	Exley, E.M.	1	no	981	Exley, E.M. 1969. Argohesma--a new genus of Australian bees (Apoidea: Colletidae). Australian Journal of Zoology 17: 527-534 [Date published 31/12/1969]	Article in Journal	Australia	no	Australian Journal of Zoology	agency	CSIRO
Apoidea	Hymenoptera	Xanthesma	Argohesma	euxesta		Valid	Species	N	Exley	1969	Exley, E.M.	1	no	981	Exley, E.M. 1969. Argohesma--a new genus of Australian bees (Apoidea: Colletidae). Australian Journal of Zoology 17: 527-534 [Date published 31/12/1969]	Article in Journal	Australia	no	Australian Journal of Zoology	agency	CSIRO
Apoidea	Hymenoptera	Xanthesma	Argohesma	lucida		Valid	Species	N	Exley	1974	Exley, E.M.	1	no	987	Exley, E.M. 1974. A contribution to our knowledge of the bee fauna (Colletidae: Euryglossinae) of remote areas of Australia with descriptions of new species. Proceedings of the Royal Society of Queensland 85: 95-110 [Date published 31/12/1974]	Article in Journal	Australia	no	Proceedings of the Royal Society of Queensland	society	RoySocQld
Apoidea	Hymenoptera	Xanthesma	Argohesma	lukinsiana		Valid	Species	N	Exley	1969	Exley, E.M.	1	no	981	Exley, E.M. 1969. Argohesma--a new genus of Australian bees (Apoidea: Colletidae). Australian Journal of Zoology 17: 527-534 [Date published 31/12/1969]	Article in Journal	Australia	no	Australian Journal of Zoology	agency	CSIRO
Apoidea	Hymenoptera	Xanthesma	Argohesma	megacephala		Valid	Species	N	Exley	1974	Exley, E.M.	1	no	987	Exley, E.M. 1974. A contribution to our knowledge of the bee fauna (Colletidae: Euryglossinae) of remote areas of Australia with descriptions of new species. Proceedings of the Royal Society of Queensland 85: 95-110 [Date published 31/12/1974]	Article in Journal	Australia	no	Proceedings of the Royal Society of Queensland	society	RoySocQld
Apoidea	Hymenoptera	Xanthesma	Argohesma	nukarnensis		Valid	Species	N	Exley	1974	Exley, E.M.	1	no	987	Exley, E.M. 1974. A contribution to our knowledge of the bee fauna (Colletidae: Euryglossinae) of remote areas of Australia with descriptions of new species. Proceedings of the Royal Society of Queensland 85: 95-110 [Date published 31/12/1974]	Article in Journal	Australia	no	Proceedings of the Royal Society of Queensland	society	RoySocQld
Apoidea	Hymenoptera	Xanthesma	Chaetohesma	baringa		Valid	Species	N	Exley	1978	Exley, E.M.	1	no	996	Exley, E.M. 1978. Chaetohesma--a new genus of Australian bees (Apoidea: Colletidae: Euryglossinae). Australian Journal of Zoology 26: 373-397 [Date published 31/12/1978]	Article in Journal	Australia	no	Australian Journal of Zoology	agency	CSIRO
Apoidea	Hymenoptera	Xanthesma	Chaetohesma	foveolata		Valid	Species	N	Exley	1978	Exley, E.M.	1	no	996	Exley, E.M. 1978. Chaetohesma--a new genus of Australian bees (Apoidea: Colletidae: Euryglossinae). Australian Journal of Zoology 26: 373-397 [Date published 31/12/1978]	Article in Journal	Australia	no	Australian Journal of Zoology	agency	CSIRO
Apoidea	Hymenoptera	Xanthesma	Chaetohesma	infuscata		Valid	Species	N	Exley	1978	Exley, E.M.	1	no	996	Exley, E.M. 1978. Chaetohesma--a new genus of Australian bees (Apoidea: Colletidae: Euryglossinae). Australian Journal of Zoology 26: 373-397 [Date published 31/12/1978]	Article in Journal	Australia	no	Australian Journal of Zoology	agency	CSIRO
Apoidea	Hymenoptera	Xanthesma	Chaetohesma	isae		Valid	Species	N	Exley	1978	Exley, E.M.	1	no	996	Exley, E.M. 1978. Chaetohesma--a new genus of Australian bees (Apoidea: Colletidae: Euryglossinae). Australian Journal of Zoology 26: 373-397 [Date published 31/12/1978]	Article in Journal	Australia	no	Australian Journal of Zoology	agency	CSIRO
Apoidea	Hymenoptera	Xanthesma	Chaetohesma	levis		Valid	Species	N	Exley	1978	Exley, E.M.	1	no	996	Exley, E.M. 1978. Chaetohesma--a new genus of Australian bees (Apoidea: Colletidae: Euryglossinae). Australian Journal of Zoology 26: 373-397 [Date published 31/12/1978]	Article in Journal	Australia	no	Australian Journal of Zoology	agency	CSIRO
Apoidea	Hymenoptera	Xanthesma	Chaetohesma	megastigma		Valid	Species	N	Exley	1978	Exley, E.M.	1	no	996	Exley, E.M. 1978. Chaetohesma--a new genus of Australian bees (Apoidea: Colletidae: Euryglossinae). Australian Journal of Zoology 26: 373-397 [Date published 31/12/1978]	Article in Journal	Australia	no	Australian Journal of Zoology	agency	CSIRO
Apoidea	Hymenoptera	Xanthesma	Chaetohesma	newmanensis		Valid	Species	N	Exley	1978	Exley, E.M.	1	no	996	Exley, E.M. 1978. Chaetohesma--a new genus of Australian bees (Apoidea: Colletidae: Euryglossinae). Australian Journal of Zoology 26: 373-397 [Date published 31/12/1978]	Article in Journal	Australia	no	Australian Journal of Zoology	agency	CSIRO
Apoidea	Hymenoptera	Xanthesma	Chaetohesma	robusta		Valid	Species	N	Exley	1978	Exley, E.M.	1	no	996	Exley, E.M. 1978. Chaetohesma--a new genus of Australian bees (Apoidea: Colletidae: Euryglossinae). Australian Journal of Zoology 26: 373-397 [Date published 31/12/1978]	Article in Journal	Australia	no	Australian Journal of Zoology	agency	CSIRO
Apoidea	Hymenoptera	Xanthesma	Chaetohesma	striolata		Valid	Species	N	Exley	1978	Exley, E.M.	1	no	996	Exley, E.M. 1978. Chaetohesma--a new genus of Australian bees (Apoidea: Colletidae: Euryglossinae). Australian Journal of Zoology 26: 373-397 [Date published 31/12/1978]	Article in Journal	Australia	no	Australian Journal of Zoology	agency	CSIRO
Apoidea	Hymenoptera	Xanthesma	Chaetohesma	tuberculata		Valid	Species	N	Exley	1978	Exley, E.M.	1	no	996	Exley, E.M. 1978. Chaetohesma--a new genus of Australian bees (Apoidea: Colletidae: Euryglossinae). Australian Journal of Zoology 26: 373-397 [Date published 31/12/1978]	Article in Journal	Australia	no	Australian Journal of Zoology	agency	CSIRO
Apoidea	Hymenoptera	Xanthesma	Xanthesma	argosomata		Valid	Species	Y	Exley	1969	Exley, E.M.	1	no	983	Exley, E.M. 1969. Revision of the genus Xanthesma Michener (Apoidea: Colletidae). Australian Journal of Zoology 17: 515-526 [Date published 31/12/1969]	Article in Journal	Australia	no	Australian Journal of Zoology	agency	CSIRO
Apoidea	Hymenoptera	Xanthesma	Xanthesma	dasycephala		Valid	Species	Y	Exley	1969	Exley, E.M.	1	no	983	Exley, E.M. 1969. Revision of the genus Xanthesma Michener (Apoidea: Colletidae). Australian Journal of Zoology 17: 515-526 [Date published 31/12/1969]	Article in Journal	Australia	no	Australian Journal of Zoology	agency	CSIRO
Apoidea	Hymenoptera	Xanthesma	Xanthesma	flava		Valid	Species	Y	Michener	1965	Michener, C.D.	1	no	2014	Michener, C.D. 1965. A classification of the bees of the Australian and South Pacific regions. Bulletin of the American Museum of Natural History 130: 1-362 [Date published 31/12/1965]	Article in Journal	USA	no	Bulletin of the American Museum of Natural History	na	na
Apoidea	Hymenoptera	Xanthesma	Xanthesma	lasiosomata		Valid	Species	Y	Exley	1969	Exley, E.M.	1	no	983	Exley, E.M. 1969. Revision of the genus Xanthesma Michener (Apoidea: Colletidae). Australian Journal of Zoology 17: 515-526 [Date published 31/12/1969]	Article in Journal	Australia	no	Australian Journal of Zoology	agency	CSIRO
Apoidea	Hymenoptera	Xanthesma	Xanthesma	lutea		Valid	Species	Y	Exley	1969	Exley, E.M.	1	no	983	Exley, E.M. 1969. Revision of the genus Xanthesma Michener (Apoidea: Colletidae). Australian Journal of Zoology 17: 515-526 [Date published 31/12/1969]	Article in Journal	Australia	no	Australian Journal of Zoology	agency	CSIRO
Apoidea	Hymenoptera	Xanthesma	Xanthesma	merredensis		Valid	Species	Y	Exley	1974	Exley, E.M.	1	no	987	Exley, E.M. 1974. A contribution to our knowledge of the bee fauna (Colletidae: Euryglossinae) of remote areas of Australia with descriptions of new species. Proceedings of the Royal Society of Queensland 85: 95-110 [Date published 31/12/1974]	Article in Journal	Australia	no	Proceedings of the Royal Society of Queensland	society	RoySocQld
Apoidea	Hymenoptera	Xanthesma	Xanthesma	micheneri		Valid	Species	Y	Exley	1978	Exley, E.M.	1	no	995	Exley, E.M. 1978. A new species of Xanthesma from Australia (Apoidea: Colletidae: Euryglossinae). Journal of the Kansas Entomological Society 51: 781-786 [Date published 31/12/1978]	Article in Journal	USA	yes	Journal of the Kansas Entomological Society	na	na
Apoidea	Hymenoptera	Xanthesma	Xanthesma	nigrior		Valid	Species	Y	Michener	1965	Michener, C.D.	1	no	2014	Michener, C.D. 1965. A classification of the bees of the Australian and South Pacific regions. Bulletin of the American Museum of Natural History 130: 1-362 [Date published 31/12/1965]	Article in Journal	USA	no	Bulletin of the American Museum of Natural History	na	na
Apoidea	Hymenoptera	Xanthesma	Xanthesma	parva		Valid	Species	Y	Exley	1969	Exley, E.M.	1	no	983	Exley, E.M. 1969. Revision of the genus Xanthesma Michener (Apoidea: Colletidae). Australian Journal of Zoology 17: 515-526 [Date published 31/12/1969]	Article in Journal	Australia	no	Australian Journal of Zoology	agency	CSIRO
Apoidea	Hymenoptera	Xanthesma	Xanthesma	trisulca		Valid	Species	Y	Exley	1969	Exley, E.M.	1	no	983	Exley, E.M. 1969. Revision of the genus Xanthesma Michener (Apoidea: Colletidae). Australian Journal of Zoology 17: 515-526 [Date published 31/12/1969]	Article in Journal	Australia	no	Australian Journal of Zoology	agency	CSIRO
Apoidea	Hymenoptera	Xanthesma	Xanthesma	vittata		Valid	Species	Y	Exley	1969	Exley, E.M.	1	no	983	Exley, E.M. 1969. Revision of the genus Xanthesma Michener (Apoidea: Colletidae). Australian Journal of Zoology 17: 515-526 [Date published 31/12/1969]	Article in Journal	Australia	no	Australian Journal of Zoology	agency	CSIRO
Apoidea	Hymenoptera	Xanthesma	Xenohesma	chrysea		Valid	Species	N	Exley	1969	Exley, E.M.	1	no	984	Exley, E.M. 1969. Revision of the subgenus Xenohesma Michener (Apoidea: Colletidae). Australian Journal of Zoology 17: 535-551 [Date published 31/12/1969]	Article in Journal	Australia	no	Australian Journal of Zoology	agency	CSIRO
Apoidea	Hymenoptera	Xanthesma	Xenohesma	clethrosema		Valid	Species	N	Exley	1969	Exley, E.M.	1	no	984	Exley, E.M. 1969. Revision of the subgenus Xenohesma Michener (Apoidea: Colletidae). Australian Journal of Zoology 17: 535-551 [Date published 31/12/1969]	Article in Journal	Australia	no	Australian Journal of Zoology	agency	CSIRO
Apoidea	Hymenoptera	Xanthesma	Xenohesma	clypearis		Valid	Species	N	Michener	1965	Michener, C.D.	1	no	2014	Michener, C.D. 1965. A classification of the bees of the Australian and South Pacific regions. Bulletin of the American Museum of Natural History 130: 1-362 [Date published 31/12/1965]	Article in Journal	USA	no	Bulletin of the American Museum of Natural History	na	na
Apoidea	Hymenoptera	Xanthesma	Xenohesma	evansi		Valid	Species	N	Michener	1965	Michener, C.D.	1	no	2014	Michener, C.D. 1965. A classification of the bees of the Australian and South Pacific regions. Bulletin of the American Museum of Natural History 130: 1-362 [Date published 31/12/1965]	Article in Journal	USA	no	Bulletin of the American Museum of Natural History	na	na
Apoidea	Hymenoptera	Xanthesma	Xenohesma	fasciata		Valid	Species	N	Exley	1969	Exley, E.M.	1	no	984	Exley, E.M. 1969. Revision of the subgenus Xenohesma Michener (Apoidea: Colletidae). Australian Journal of Zoology 17: 535-551 [Date published 31/12/1969]	Article in Journal	Australia	no	Australian Journal of Zoology	agency	CSIRO
Apoidea	Hymenoptera	Xanthesma	Xenohesma	federalis		Valid	Species	N	Michener	1965	Michener, C.D.	1	no	2014	Michener, C.D. 1965. A classification of the bees of the Australian and South Pacific regions. Bulletin of the American Museum of Natural History 130: 1-362 [Date published 31/12/1965]	Article in Journal	USA	no	Bulletin of the American Museum of Natural History	na	na
Apoidea	Hymenoptera	Xanthesma	Xenohesma	flavicauda		Valid	Species	N	Michener	1965	Michener, C.D.	1	no	2014	Michener, C.D. 1965. A classification of the bees of the Australian and South Pacific regions. Bulletin of the American Museum of Natural History 130: 1-362 [Date published 31/12/1965]	Article in Journal	USA	no	Bulletin of the American Museum of Natural History	na	na
Apoidea	Hymenoptera	Xanthesma	Xenohesma	hirsutoscapa		Valid	Species	N	Exley	1969	Exley, E.M.	1	no	984	Exley, E.M. 1969. Revision of the subgenus Xenohesma Michener (Apoidea: Colletidae). Australian Journal of Zoology 17: 535-551 [Date published 31/12/1969]	Article in Journal	Australia	no	Australian Journal of Zoology	agency	CSIRO
Apoidea	Hymenoptera	Xanthesma	Xenohesma	melanoclypearis		Valid	Species	N	Exley	1969	Exley, E.M.	1	no	984	Exley, E.M. 1969. Revision of the subgenus Xenohesma Michener (Apoidea: Colletidae). Australian Journal of Zoology 17: 535-551 [Date published 31/12/1969]	Article in Journal	Australia	no	Australian Journal of Zoology	agency	CSIRO
Apoidea	Hymenoptera	Xanthesma	Xenohesma	primaria		Valid	Species	N	Michener	1965	Michener, C.D.	1	no	2014	Michener, C.D. 1965. A classification of the bees of the Australian and South Pacific regions. Bulletin of the American Museum of Natural History 130: 1-362 [Date published 31/12/1965]	Article in Journal	USA	no	Bulletin of the American Museum of Natural History	na	na
Apoidea	Hymenoptera	Xanthesma	Xenohesma	scutellaris		Valid	Species	N	Michener	1965	Michener, C.D.	1	no	2014	Michener, C.D. 1965. A classification of the bees of the Australian and South Pacific regions. Bulletin of the American Museum of Natural History 130: 1-362 [Date published 31/12/1965]	Article in Journal	USA	no	Bulletin of the American Museum of Natural History	na	na
Apoidea	Hymenoptera	Xanthesma	Xenohesma	sigaloessa		Valid	Species	N	Exley	1969	Exley, E.M.	1	no	984	Exley, E.M. 1969. Revision of the subgenus Xenohesma Michener (Apoidea: Colletidae). Australian Journal of Zoology 17: 535-551 [Date published 31/12/1969]	Article in Journal	Australia	no	Australian Journal of Zoology	agency	CSIRO
Apoidea	Hymenoptera	Xanthesma	Xenohesma	stagei		Valid	Species	N	Exley	1969	Exley, E.M.	1	no	984	Exley, E.M. 1969. Revision of the subgenus Xenohesma Michener (Apoidea: Colletidae). Australian Journal of Zoology 17: 535-551 [Date published 31/12/1969]	Article in Journal	Australia	no	Australian Journal of Zoology	agency	CSIRO
Apoidea	Hymenoptera	Xylocopa	Koptortosoma	lieftincki		Valid	Species	Y	Leys	2000	Leys, R.	1	no	1736	Leys, R. 2000. A revision of the Australian carpenter bees, genus Xylocopa Latreille, subgenera Koptortosoma Griboda and Lestis Lepeletier & Serville (Hymenoptera: Apidae). Invertebrate Taxonomy 14: 115-136	Article in Journal	Australia	no	Invertebrate Taxonomy	agency	CSIRO
Apoidea	Hymenoptera	Xylocopa	Koptortosoma	waterhousei		Valid	Species	Y	Leys	2000	Leys, R.	1	no	1736	Leys, R. 2000. A revision of the Australian carpenter bees, genus Xylocopa Latreille, subgenera Koptortosoma Griboda and Lestis Lepeletier & Serville (Hymenoptera: Apidae). Invertebrate Taxonomy 14: 115-136	Article in Journal	Australia	no	Invertebrate Taxonomy	agency	CSIRO
Apoidea	Hymenoptera	Zutrhopalum		bataviae		Valid	Species	Y	Leclercq	1998	Leclercq, J.	1	no	1719	Leclercq, J. 1998. Hyménoptères Crabroniens d'Australie du genre Zutrhopalum Leclercq, gen. n. (Hymenoptera, Sphecidae). Bulletin et Annales de la Société Royale Belgique d'Entomologie 134: 59-66	Article in Journal	Belgium	yes	Bulletin et Annales de la Société Royale Belgique d'Entomologie	na	na
Apoidea	Hymenoptera	Zutrhopalum		liepae		Valid	Species	Y	Leclercq	1998	Leclercq, J.	1	no	1719	Leclercq, J. 1998. Hyménoptères Crabroniens d'Australie du genre Zutrhopalum Leclercq, gen. n. (Hymenoptera, Sphecidae). Bulletin et Annales de la Société Royale Belgique d'Entomologie 134: 59-66	Article in Journal	Belgium	yes	Bulletin et Annales de la Société Royale Belgique d'Entomologie	na	na
Apoidea	Hymenoptera	Zutrhopalum		webbanum		Valid	Species	Y	Leclercq	1998	Leclercq, J.	1	no	1719	Leclercq, J. 1998. Hyménoptères Crabroniens d'Australie du genre Zutrhopalum Leclercq, gen. n. (Hymenoptera, Sphecidae). Bulletin et Annales de la Société Royale Belgique d'Entomologie 134: 59-66	Article in Journal	Belgium	yes	Bulletin et Annales de la Société Royale Belgique d'Entomologie	na	na
Apoidea	Hymenoptera	Zutrhopalum		zborowskii		Valid	Species	Y	Leclercq	1998	Leclercq, J.	1	no	1719	Leclercq, J. 1998. Hyménoptères Crabroniens d'Australie du genre Zutrhopalum Leclercq, gen. n. (Hymenoptera, Sphecidae). Bulletin et Annales de la Société Royale Belgique d'Entomologie 134: 59-66	Article in Journal	Belgium	yes	Bulletin et Annales de la Société Royale Belgique d'Entomologie	na	na
Archaeognatha	Archaeognatha	Machilelloides		incoloratus		Valid	Species	Y	Sturm & Smith	1993	Sturm, H. & Smith, G.B.	2	no	2914	Sturm, H. & Smith, G.B. 1993. New bristle tails (Archaeognatha: Meinertellidae) from Australia. Journal of the Australian Entomological Society 32: 233-240	Article in Journal	Australia	yes	Journal of the Australian Entomological Society	society	AustEntSoc
Archaeognatha	Archaeognatha	Machiloides		granulatus		Valid	Species	Y	Sturm & Smith	1993	Sturm, H. & Smith, G.B.	2	no	2914	Sturm, H. & Smith, G.B. 1993. New bristle tails (Archaeognatha: Meinertellidae) from Australia. Journal of the Australian Entomological Society 32: 233-240	Article in Journal	Australia	yes	Journal of the Australian Entomological Society	society	AustEntSoc
Archaeognatha	Archaeognatha	Nesomachilis		howensis		Valid	Species	Y	Sturm	1980	Sturm, H.	1	no	2913	Sturm, H. 1980. Redescription of Nesomachilis (Archaeognatha: Meinertellidae), with descriptions of new species from the Australian region. New Zealand Journal of Zoology 7: 533-550	Article in Journal	New Zealand	no	New Zealand Journal of Zoology	na	na
Archaeognatha	Archaeognatha	Nesomachilis		queenslandica		Valid	Species	Y	Sturm	1980	Sturm, H.	1	no	2913	Sturm, H. 1980. Redescription of Nesomachilis (Archaeognatha: Meinertellidae), with descriptions of new species from the Australian region. New Zealand Journal of Zoology 7: 533-550	Article in Journal	New Zealand	no	New Zealand Journal of Zoology	na	na
Archaeognatha	Archaeognatha	Nesomachilis		tamborina		Valid	Species	Y	Sturm	1980	Sturm, H.	1	no	2913	Sturm, H. 1980. Redescription of Nesomachilis (Archaeognatha: Meinertellidae), with descriptions of new species from the Australian region. New Zealand Journal of Zoology 7: 533-550	Article in Journal	New Zealand	no	New Zealand Journal of Zoology	na	na
Archaeognatha	Archaeognatha	Nesomachilis		watsoni		Valid	Species	Y	Sturm	1980	Sturm, H.	1	no	2913	Sturm, H. 1980. Redescription of Nesomachilis (Archaeognatha: Meinertellidae), with descriptions of new species from the Australian region. New Zealand Journal of Zoology 7: 533-550	Article in Journal	New Zealand	no	New Zealand Journal of Zoology	na	na
Archostemata	Coleoptera	Adinolepis		apodema		Valid	Species	Y	Neboiss	1987	Neboiss, A.	1	no	2219	Neboiss, A. 1987. A new species of Adinolepis Neboiss from Western Australia (Cupedidae: Coleoptera). Records of the Western Australian Museum 13(3): 323-325	Article in Journal	Australia	no	Records of the Australian Museum	museum	AusMus
Archostemata	Coleoptera	Adinolepis		scalena		Valid	Species	Y	Neboiss	1984	Neboiss, A.	1	no	2216	Neboiss, A. 1984. Reclassification of Cupes Fabricius (s. lat.), with descriptions of new genera and species (Cupedidae: Coleoptera). Systematic Entomology 9: 443-477	Article in Journal	UK	yes	Systematic Entomology	na	na
Archostemata	Coleoptera	Omma		rutherfordi		Valid	Species	Y	Lawrence	1999	Lawrence, J.F.	1	no	1706	Lawrence, J.F. 1999. The Australian Ommatidae (Coleoptera: Archostemata): new species, larva and discussion of relationships. Invertebrate Taxonomy 13(3): 369-390	Article in Journal	Australia	no	Invertebrate Taxonomy	agency	CSIRO
Archostemata	Coleoptera	Omma		sagitta		Valid	Species	Y	Neboiss	1989	Neboiss, A.	1	no	2220	Neboiss, A. 1989. New species of Archostemata (Coleoptera, Ommatidae, Cupedidae). Revue Française d'Entomologie ns 11(3): 109-115	Article in Journal	France	yes	Revue Française d'Entomologie	na	na
Auchenorrhyncha	Hemiptera	Acanthucalis		macalpini		Valid	Species	Y	Evans	1966	Evans, J.W.	1	no	955	Evans, J.W. 1966. The leafhoppers and froghoppers of Australia and New Zealand. Memoirs of the Australian Museum 12: 1-347	Article in Journal	Australia	no	Memoirs of the Australian Museum	museum	AusMus
Auchenorrhyncha	Hemiptera	Acrodelphax		thimbron		Valid	Species	Y	Fennah	1965	Fennah, R.G.	1	no	1020	Fennah, R.G. 1965. Delphacidae from Australia and New Zealand (Homoptera: Fulgoroidea). Bulletin of the British Museum (Natural History) Entomology 17(1): 1-59	Article in Journal	UK	yes	Bulletin of the British Museum (Natural History) Entomology	na	na
Auchenorrhyncha	Hemiptera	Alocanthella		fulva		Valid	Species	Y	Evans	1966	Evans, J.W.	1	no	955	Evans, J.W. 1966. The leafhoppers and froghoppers of Australia and New Zealand. Memoirs of the Australian Museum 12: 1-347	Article in Journal	Australia	no	Memoirs of the Australian Museum	museum	AusMus
Auchenorrhyncha	Hemiptera	Alocebes		dixoni		Valid	Species	Y	Evans	1966	Evans, J.W.	1	no	955	Evans, J.W. 1966. The leafhoppers and froghoppers of Australia and New Zealand. Memoirs of the Australian Museum 12: 1-347	Article in Journal	Australia	no	Memoirs of the Australian Museum	museum	AusMus
Auchenorrhyncha	Hemiptera	Alodeltocephalus		draba		Valid	Species	Y	Evans	1966	Evans, J.W.	1	no	955	Evans, J.W. 1966. The leafhoppers and froghoppers of Australia and New Zealand. Memoirs of the Australian Museum 12: 1-347	Article in Journal	Australia	no	Memoirs of the Australian Museum	museum	AusMus
Auchenorrhyncha	Hemiptera	Aloeurymela		gearyi		Valid	Species	Y	Evans	1965	Evans, J.W.	1	no	954	Evans, J.W. 1965. A new genus and species of Eurymelidae (Homoptera, Cicadelloidea). Proceedings of the Linnean Society of New South Wales 90(1): 85-86	Article in Journal	Australia	no	Proceedings of the Linnean Society of New South Wales	society	LinnSocNSW
Auchenorrhyncha	Hemiptera	Aloeurymela		langfieldi		Valid	Species	Y	Evans	1966	Evans, J.W.	1	no	955	Evans, J.W. 1966. The leafhoppers and froghoppers of Australia and New Zealand. Memoirs of the Australian Museum 12: 1-347	Article in Journal	Australia	no	Memoirs of the Australian Museum	museum	AusMus
Auchenorrhyncha	Hemiptera	Aloplemmeles		colorata		Valid	Species	Y	Evans	1966	Evans, J.W.	1	no	955	Evans, J.W. 1966. The leafhoppers and froghoppers of Australia and New Zealand. Memoirs of the Australian Museum 12: 1-347	Article in Journal	Australia	no	Memoirs of the Australian Museum	museum	AusMus
Auchenorrhyncha	Hemiptera	Aloplemmeles		gearyi		Valid	Species	Y	Evans	1966	Evans, J.W.	1	no	955	Evans, J.W. 1966. The leafhoppers and froghoppers of Australia and New Zealand. Memoirs of the Australian Museum 12: 1-347	Article in Journal	Australia	no	Memoirs of the Australian Museum	museum	AusMus
Auchenorrhyncha	Hemiptera	Aloplemmeles		simplex		Valid	Species	Y	Evans	1966	Evans, J.W.	1	no	955	Evans, J.W. 1966. The leafhoppers and froghoppers of Australia and New Zealand. Memoirs of the Australian Museum 12: 1-347	Article in Journal	Australia	no	Memoirs of the Australian Museum	museum	AusMus
Auchenorrhyncha	Hemiptera	Alseis		awoongaensis		Valid	Species	Y	Stevens	1991	Stevens, M.M.	1	no	2896	Stevens, M.M. 1991. Revision of the genus Alseis Kirkaldy (Homoptera: Cicadelloidea: Cicadellidae) with descriptions of six new species. Invertebrate Taxonomy 5: 43-59	Article in Journal	Australia	no	Invertebrate Taxonomy	agency	CSIRO
Auchenorrhyncha	Hemiptera	Alseis		brittoni		Valid	Species	Y	Stevens	1991	Stevens, M.M.	1	no	2896	Stevens, M.M. 1991. Revision of the genus Alseis Kirkaldy (Homoptera: Cicadelloidea: Cicadellidae) with descriptions of six new species. Invertebrate Taxonomy 5: 43-59	Article in Journal	Australia	no	Invertebrate Taxonomy	agency	CSIRO
Auchenorrhyncha	Hemiptera	Alseis		gattonensis		Valid	Species	Y	Stevens	1991	Stevens, M.M.	1	no	2896	Stevens, M.M. 1991. Revision of the genus Alseis Kirkaldy (Homoptera: Cicadelloidea: Cicadellidae) with descriptions of six new species. Invertebrate Taxonomy 5: 43-59	Article in Journal	Australia	no	Invertebrate Taxonomy	agency	CSIRO
Auchenorrhyncha	Hemiptera	Alseis		hackeri		Valid	Species	Y	Stevens	1991	Stevens, M.M.	1	no	2896	Stevens, M.M. 1991. Revision of the genus Alseis Kirkaldy (Homoptera: Cicadelloidea: Cicadellidae) with descriptions of six new species. Invertebrate Taxonomy 5: 43-59	Article in Journal	Australia	no	Invertebrate Taxonomy	agency	CSIRO
Auchenorrhyncha	Hemiptera	Alseis		monstrosa		Valid	Species	Y	Stevens	1991	Stevens, M.M.	1	no	2896	Stevens, M.M. 1991. Revision of the genus Alseis Kirkaldy (Homoptera: Cicadelloidea: Cicadellidae) with descriptions of six new species. Invertebrate Taxonomy 5: 43-59	Article in Journal	Australia	no	Invertebrate Taxonomy	agency	CSIRO
Auchenorrhyncha	Hemiptera	Alseis		noccundraensis		Valid	Species	Y	Stevens	1991	Stevens, M.M.	1	no	2896	Stevens, M.M. 1991. Revision of the genus Alseis Kirkaldy (Homoptera: Cicadelloidea: Cicadellidae) with descriptions of six new species. Invertebrate Taxonomy 5: 43-59	Article in Journal	Australia	no	Invertebrate Taxonomy	agency	CSIRO
Auchenorrhyncha	Hemiptera	Anabunda		minuta		Valid	Species	Y	Moir & Fletcher	2006	Moir, M.L. & Fletcher, M.J.	2	no	2041	Moir, M.L. & Fletcher, M.J. 2006. Two new species of Anabunda Emeljanov (Hemiptera: Fulgoromorpha: Achilidae) from Australia. Zootaxa 1328: 39-50	Article in Journal	New Zealand	no	Zootaxa	na	na
Auchenorrhyncha	Hemiptera	Anabunda		murrayfletcheri		Valid	Species	Y	Moir in Moir & Fletcher	2006	Moir, M.L. in Moir, M.L. & Fletcher, M.J.	1	yes	2041	Moir, M.L. & Fletcher, M.J. 2006. Two new species of Anabunda Emeljanov (Hemiptera: Fulgoromorpha: Achilidae) from Australia. Zootaxa 1328: 39-50	Article in Journal	New Zealand	no	Zootaxa	na	na
Auchenorrhyncha	Hemiptera	Anabunda		retortinervis		Valid	Species	Y	Emeljanov	2005	Emeljanov, A.F.	1	no	907	Emeljanov, A.F. 2005. New genera and species of the Family Achilidae (Homoptera). Entomologicheskoe Obozrenie (English translation as Entomological Reviews) 84 1: 10-45	Article in Journal	Russia	yes	Entomologicheskoe Obozrenie	na	na
Auchenorrhyncha	Hemiptera	Anchodelphax		olenus		Valid	Species	Y	Fennah	1965	Fennah, R.G.	1	no	1020	Fennah, R.G. 1965. Delphacidae from Australia and New Zealand (Homoptera: Fulgoroidea). Bulletin of the British Museum (Natural History) Entomology 17(1): 1-59	Article in Journal	UK	yes	Bulletin of the British Museum (Natural History) Entomology	na	na
Auchenorrhyncha	Hemiptera	Andes		dossenus		Valid	Species	Y	Löcker in Löcker, Fletcher, Holzinger & Gurr	2007	Löcker, B. in Löcker, B., Fletcher, M.J., Holzinger, W.E. & Gurr, G.M.	1	yes	1779	Löcker, B., Fletcher, M.J., Holzinger, W.E. & Gurr, G.M. 2007. Revision of the Australian Andini (Hemiptera: Fulgoromorpha: Cixiidae) with a description of five new species. Zootaxa 1475: 43-59	Article in Journal	New Zealand	no	Zootaxa	na	na
Auchenorrhyncha	Hemiptera	Andes		ikelus		Valid	Species	Y	Löcker in Löcker, Fletcher, Holzinger & Gurr	2007	Löcker, B. in Löcker, B., Fletcher, M.J., Holzinger, W.E. & Gurr, G.M.	1	yes	1779	Löcker, B., Fletcher, M.J., Holzinger, W.E. & Gurr, G.M. 2007. Revision of the Australian Andini (Hemiptera: Fulgoromorpha: Cixiidae) with a description of five new species. Zootaxa 1475: 43-59	Article in Journal	New Zealand	no	Zootaxa	na	na
Auchenorrhyncha	Hemiptera	Andes		lamondensis		Valid	Species	Y	Löcker in Löcker, Fletcher, Holzinger & Gurr	2007	Löcker, B. in Löcker, B., Fletcher, M.J., Holzinger, W.E. & Gurr, G.M.	1	yes	1779	Löcker, B., Fletcher, M.J., Holzinger, W.E. & Gurr, G.M. 2007. Revision of the Australian Andini (Hemiptera: Fulgoromorpha: Cixiidae) with a description of five new species. Zootaxa 1475: 43-59	Article in Journal	New Zealand	no	Zootaxa	na	na
Auchenorrhyncha	Hemiptera	Andes		moaensis		Valid	Species	Y	Löcker in Löcker, Fletcher, Holzinger & Gurr	2007	Löcker, B. in Löcker, B., Fletcher, M.J., Holzinger, W.E. & Gurr, G.M.	1	yes	1779	Löcker, B., Fletcher, M.J., Holzinger, W.E. & Gurr, G.M. 2007. Revision of the Australian Andini (Hemiptera: Fulgoromorpha: Cixiidae) with a description of five new species. Zootaxa 1475: 43-59	Article in Journal	New Zealand	no	Zootaxa	na	na
Auchenorrhyncha	Hemiptera	Andes		turrondi		Valid	Species	Y	Löcker in Löcker, Fletcher, Holzinger & Gurr	2007	Löcker, B. in Löcker, B., Fletcher, M.J., Holzinger, W.E. & Gurr, G.M.	1	yes	1779	Löcker, B., Fletcher, M.J., Holzinger, W.E. & Gurr, G.M. 2007. Revision of the Australian Andini (Hemiptera: Fulgoromorpha: Cixiidae) with a description of five new species. Zootaxa 1475: 43-59	Article in Journal	New Zealand	no	Zootaxa	na	na
Auchenorrhyncha	Hemiptera	Aneipo		minerva		Valid	Species	Y	Lambkin	1978	Lambkin, K.J.	1	no	1666	Lambkin, K.J. 1978. The Australian achiline genera Aneipo Kirkaldy and Bunduica Jacobi (Homoptera: Fulgoroidea: Achilidae). Journal of the Australian Entomological Society 17(1): 25-40	Article in Journal	Australia	yes	Journal of the Australian Entomological Society	society	AustEntSoc
Auchenorrhyncha	Hemiptera	Aneono		darwinensis		Valid	Species	Y	Evans	1966	Evans, J.W.	1	no	955	Evans, J.W. 1966. The leafhoppers and froghoppers of Australia and New Zealand. Memoirs of the Australian Museum 12: 1-347	Article in Journal	Australia	no	Memoirs of the Australian Museum	museum	AusMus
Auchenorrhyncha	Hemiptera	Aneono		evansi		Valid	Species	Y	Dworakowska	1972	Dworakowska, I.	1	no	882	Dworakowska, I. 1972. Australian Dikraneurini (Auchenorrhyncha: Cicadellidae: Typhlocybinae). Bulletin de l'Académie Polonaise des Sciences. Série des Sciences Biologiques 20(3): 193-201	Article in Journal	Poland	no	Bulletin de l'Académie Polonaise des Sciences, Série des Sciences Biologiques	na	na
Auchenorrhyncha	Hemiptera	Aneono		leichhardti		Valid	Species	Y	Dworakowska	1972	Dworakowska, I.	1	no	882	Dworakowska, I. 1972. Australian Dikraneurini (Auchenorrhyncha: Cicadellidae: Typhlocybinae). Bulletin de l'Académie Polonaise des Sciences. Série des Sciences Biologiques 20(3): 193-201	Article in Journal	Poland	no	Bulletin de l'Académie Polonaise des Sciences, Série des Sciences Biologiques	na	na
Auchenorrhyncha	Hemiptera	Anyllis		spinostylus		Valid	Species	Y	Liang in Liang, Fletcher & Jiang	2005	Liang, A.P. in Liang, A.P., Fletcher, M.J. & Jiang, G.M.	1	yes	1738	Liang, A.P., Fletcher, M.J. & Jiang, G.M. 2005. The endemic Australian spittlebug genus Anyllis Kirkaldy (Hemiptera: Aphrophoridae) with description of a new species from Tasmania. Journal of the Kansas Entomological Society 78(4): 301-307	Article in Journal	USA	yes	Journal of the Kansas Entomological Society	na	na
Auchenorrhyncha	Hemiptera	Anzygina		agni		Valid	Species	N	Knight	1976	Knight, W.J.	1	no	1568	Knight, W.J. 1976. Typhlocybinae of New Zealand (Homoptera : Cicadellidae). New Zealand Journal of Zoology 2(2): 71-87	Article in Journal	New Zealand	no	New Zealand Journal of Zoology	na	na
Auchenorrhyncha	Hemiptera	Anzygina		billi		Valid	Species	Y	Fletcher & Larivière	2009	Fletcher, M.J. & Larivière, M.-C.	2	no	1052	Fletcher, M.J. & Larivière, M.-C. 2009. Anzygina, a new genus for some Australasian microleafhopper species formerly placed in the genus Zygina Fieber (Cicadellidae: Typhlocybinae: Erythroneurini). Australian Journal of Entomology 48(2): 164-176	Article in Journal	Australia	yes	Australian Journal of Entomology	society	AustEntSoc
Auchenorrhyncha	Hemiptera	Anzygina		jowettae		Valid	Species	N	Knight	1976	Knight, W.J.	1	no	1567	Knight, W.J. 1976. The leafhoppers of Lord Howe, Norfolk, Kermadec, and Chatham Islands and their relationship to the fauna of New Zealand (Homoptera: Cicadellidae). New Zealand Journal of Zoology 3: 89-98	Article in Journal	New Zealand	no	New Zealand Journal of Zoology	na	na
Auchenorrhyncha	Hemiptera	Arawa		pulchra		Valid	Species	Y	Knight	1975	Knight, W.J.	1	no	1566	Knight, W.J. 1975. Deltocephalinae of New Zealand. New Zealand Journal of Zoology 2(2): 169-208	Article in Journal	New Zealand	no	New Zealand Journal of Zoology	na	na
Auchenorrhyncha	Hemiptera	Aubirestus		semicirculatus		Valid	Species	Y	Löcker & Larivière in Löcker, Fletcher, Larivière, Gurr, Holzinger and Löcker	2006	Löcker, B. & Larivière, M.-C. in Löcker, B., Fletcher, M.J., Larivière, M.-C., Gurr, G.M., Holzinger, W.E. & Löcker, H.	2	yes	1781	Löcker, B., Fletcher, M.J., Larivière, M.-C., Gurr, G.M., Holzinger, W.E. & Löcker, H. 2006. Taxonomic and phylogenetic revision of the Gelastocephalini (Hemiptera: Cixiidae). Invertebrate Systematics 20: 59-160	Article in Journal	Australia	no	Invertebrate Systematics	agency	CSIRO
Auchenorrhyncha	Hemiptera	Austroagalloides		moorei		Valid	Species	Y	Evans	1977	Evans, J.W.	1	no	963	Evans, J.W. 1977. The leafhoppers and froghoppers of Australia and New Zealand. Part 2. Records of the Australian Museum 31(3): 83-129	Article in Journal	Australia	no	Records of the Australian Museum	museum	AusMus
Auchenorrhyncha	Hemiptera	Austrocerus		asymmetricus		Valid	Species	Y	Webb	1983	Webb, M.D.	1	no	3237	Webb, M.D. 1983. Revision of the Australian Idiocerinae (Hemiptera: Homoptera: Cicadellidae). Australian Journal of Zoology Supplementary Series 92: 1-147	Article in Journal	Australia	no	Australian Journal of Zoology Supplementary Series	agency	CSIRO
Auchenorrhyncha	Hemiptera	Austrodascalia		evansorum		Valid	Species	Y	Fletcher	1988	Fletcher, M.J.	1	no	1041	Fletcher, M.J. 1988. The Australian genera of Flatidae (Homoptera: Fulgoroidea). General and Applied Entomology 20: 9-32	Article in Journal	Australia	yes	General and Applied Entomology	society	EntSocNSW
Auchenorrhyncha	Hemiptera	Austrotartessus		flavobrunneus		Valid	Species	Y	Evans	1981	Evans, F.	1	no	931	Evans, F. 1981. The Tartessinae of Australia, New Guinea and some adjacent Islands (Homoptera: Cicadellidae). Pacific Insects 23(1-2): 112-188	Article in Journal	USA	yes	Pacific Insects	na	na
Auchenorrhyncha	Hemiptera	Austrotartessus		hattonensis		Valid	Species	Y	Evans	1981	Evans, F.	1	no	931	Evans, F. 1981. The Tartessinae of Australia, New Guinea and some adjacent Islands (Homoptera: Cicadellidae). Pacific Insects 23(1-2): 112-188	Article in Journal	USA	yes	Pacific Insects	na	na
Auchenorrhyncha	Hemiptera	Austrotartessus		monteithi		Valid	Species	Y	Evans	1981	Evans, F.	1	no	931	Evans, F. 1981. The Tartessinae of Australia, New Guinea and some adjacent Islands (Homoptera: Cicadellidae). Pacific Insects 23(1-2): 112-188	Article in Journal	USA	yes	Pacific Insects	na	na
Auchenorrhyncha	Hemiptera	Austrotartessus		muiri		Valid	Species	Y	Evans	1981	Evans, F.	1	no	931	Evans, F. 1981. The Tartessinae of Australia, New Guinea and some adjacent Islands (Homoptera: Cicadellidae). Pacific Insects 23(1-2): 112-188	Article in Journal	USA	yes	Pacific Insects	na	na
Auchenorrhyncha	Hemiptera	Austrotartessus		numinus		Valid	Species	Y	Evans	1981	Evans, F.	1	no	931	Evans, F. 1981. The Tartessinae of Australia, New Guinea and some adjacent Islands (Homoptera: Cicadellidae). Pacific Insects 23(1-2): 112-188	Article in Journal	USA	yes	Pacific Insects	na	na
Auchenorrhyncha	Hemiptera	Austrotartessus		sedlaceki		Valid	Species	Y	Evans	1981	Evans, F.	1	no	931	Evans, F. 1981. The Tartessinae of Australia, New Guinea and some adjacent Islands (Homoptera: Cicadellidae). Pacific Insects 23(1-2): 112-188	Article in Journal	USA	yes	Pacific Insects	na	na
Auchenorrhyncha	Hemiptera	Bajauana		acuminata		Valid	Species	Y	Löcker in Löcker, Fletcher & Gurr	2010	Löcker, B. in Löcker, B., Fletcher, M.J. & Gurr, G.M.	1	yes	1778	Löcker, B., Fletcher, M.J. & Gurr, G.M. 2010. Taxonomic revision of the Australian Eucarpiini (Hemiptera: Fulgoromorpha: Cixiidae) with the description of nine new species. Zootaxa 2425: 1-31	Article in Journal	New Zealand	no	Zootaxa	na	na
Auchenorrhyncha	Hemiptera	Bakeriana		nigra		Valid	Species	Y	Evans	1966	Evans, J.W.	1	no	955	Evans, J.W. 1966. The leafhoppers and froghoppers of Australia and New Zealand. Memoirs of the Australian Museum 12: 1-347	Article in Journal	Australia	no	Memoirs of the Australian Museum	museum	AusMus
Auchenorrhyncha	Hemiptera	Bakeriana		obscura		Valid	Species	Y	Evans	1966	Evans, J.W.	1	no	955	Evans, J.W. 1966. The leafhoppers and froghoppers of Australia and New Zealand. Memoirs of the Australian Museum 12: 1-347	Article in Journal	Australia	no	Memoirs of the Australian Museum	museum	AusMus
Auchenorrhyncha	Hemiptera	Balclutha		bacchusi		Valid	Species	Y	Knight	1987	Knight, W.J.	1	no	1570	Knight, W.J. 1987. Leafhoppers of the grass-feeding genus Balclutha (Homoptera, Cicadellidae) in the Pacific region. Journal of Natural History 21: 1173-1224	Article in Journal	UK	no	Journal of Natural History	na	na
Auchenorrhyncha	Hemiptera	Balclutha		rieki		Valid	Species	Y	Knight	1987	Knight, W.J.	1	no	1570	Knight, W.J. 1987. Leafhoppers of the grass-feeding genus Balclutha (Homoptera, Cicadellidae) in the Pacific region. Journal of Natural History 21: 1173-1224	Article in Journal	UK	no	Journal of Natural History	na	na
Auchenorrhyncha	Hemiptera	Balocerus		brooksi		Valid	Species	Y	Webb	1983	Webb, M.D.	1	no	3237	Webb, M.D. 1983. Revision of the Australian Idiocerinae (Hemiptera: Homoptera: Cicadellidae). Australian Journal of Zoology Supplementary Series 92: 1-147	Article in Journal	Australia	no	Australian Journal of Zoology Supplementary Series	agency	CSIRO
Auchenorrhyncha	Hemiptera	Balocerus		careebus		Valid	Species	Y	Webb	1983	Webb, M.D.	1	no	3237	Webb, M.D. 1983. Revision of the Australian Idiocerinae (Hemiptera: Homoptera: Cicadellidae). Australian Journal of Zoology Supplementary Series 92: 1-147	Article in Journal	Australia	no	Australian Journal of Zoology Supplementary Series	agency	CSIRO
Auchenorrhyncha	Hemiptera	Balocerus		lintus		Valid	Species	Y	Webb	1983	Webb, M.D.	1	no	3237	Webb, M.D. 1983. Revision of the Australian Idiocerinae (Hemiptera: Homoptera: Cicadellidae). Australian Journal of Zoology Supplementary Series 92: 1-147	Article in Journal	Australia	no	Australian Journal of Zoology Supplementary Series	agency	CSIRO
Auchenorrhyncha	Hemiptera	Balocerus		longicornis		Valid	Species	Y	Webb	1983	Webb, M.D.	1	no	3237	Webb, M.D. 1983. Revision of the Australian Idiocerinae (Hemiptera: Homoptera: Cicadellidae). Australian Journal of Zoology Supplementary Series 92: 1-147	Article in Journal	Australia	no	Australian Journal of Zoology Supplementary Series	agency	CSIRO
Auchenorrhyncha	Hemiptera	Balocerus		triozus		Valid	Species	Y	Webb	1983	Webb, M.D.	1	no	3237	Webb, M.D. 1983. Revision of the Australian Idiocerinae (Hemiptera: Homoptera: Cicadellidae). Australian Journal of Zoology Supplementary Series 92: 1-147	Article in Journal	Australia	no	Australian Journal of Zoology Supplementary Series	agency	CSIRO
Auchenorrhyncha	Hemiptera	Balocharella		bulbulla		Valid	Species	Y	Webb	1983	Webb, M.D.	1	no	3237	Webb, M.D. 1983. Revision of the Australian Idiocerinae (Hemiptera: Homoptera: Cicadellidae). Australian Journal of Zoology Supplementary Series 92: 1-147	Article in Journal	Australia	no	Australian Journal of Zoology Supplementary Series	agency	CSIRO
Auchenorrhyncha	Hemiptera	Balocharella		crosea		Valid	Species	Y	Webb	1983	Webb, M.D.	1	no	3237	Webb, M.D. 1983. Revision of the Australian Idiocerinae (Hemiptera: Homoptera: Cicadellidae). Australian Journal of Zoology Supplementary Series 92: 1-147	Article in Journal	Australia	no	Australian Journal of Zoology Supplementary Series	agency	CSIRO
Auchenorrhyncha	Hemiptera	Balocha		toesa		Valid	Species	Y	Webb	1983	Webb, M.D.	1	no	3237	Webb, M.D. 1983. Revision of the Australian Idiocerinae (Hemiptera: Homoptera: Cicadellidae). Australian Journal of Zoology Supplementary Series 92: 1-147	Article in Journal	Australia	no	Australian Journal of Zoology Supplementary Series	agency	CSIRO
Auchenorrhyncha	Hemiptera	Balocha		unilineata		Valid	Species	Y	Maldonado Capriles	1970	Maldonado Capriles, J.	1	no	1828	Maldonado Capriles, J. 1970. Studies on idiocerine leafhoppers VI. New species of Balocha from the Papuan subregion (Homoptera : Cicadellidae). Pacific Insects 12: 297-302	Article in Journal	USA	yes	Pacific Insects	na	na
Auchenorrhyncha	Hemiptera	Balyadimetopia		frederi		Valid	Species	Y	Löcker & Larivière in Löcker, Fletcher, Larivière, Gurr, Holzinger and Löcker	2006	Löcker, B. & Larivière, M.-C. in Löcker, B., Fletcher, M.J., Larivière, M.-C., Gurr, G.M., Holzinger, W.E. & Löcker, H.	2	yes	1781	Löcker, B., Fletcher, M.J., Larivière, M.-C., Gurr, G.M., Holzinger, W.E. & Löcker, H. 2006. Taxonomic and phylogenetic revision of the Gelastocephalini (Hemiptera: Cixiidae). Invertebrate Systematics 20: 59-160	Article in Journal	Australia	no	Invertebrate Systematics	agency	CSIRO
Auchenorrhyncha	Hemiptera	Balyadimetopia		krahalla		Valid	Species	Y	Löcker & Larivière in Löcker, Fletcher, Larivière, Gurr, Holzinger and Löcker	2006	Löcker, B. & Larivière, M.-C. in Löcker, B., Fletcher, M.J., Larivière, M.-C., Gurr, G.M., Holzinger, W.E. & Löcker, H.	2	yes	1781	Löcker, B., Fletcher, M.J., Larivière, M.-C., Gurr, G.M., Holzinger, W.E. & Löcker, H. 2006. Taxonomic and phylogenetic revision of the Gelastocephalini (Hemiptera: Cixiidae). Invertebrate Systematics 20: 59-160	Article in Journal	Australia	no	Invertebrate Systematics	agency	CSIRO
Auchenorrhyncha	Hemiptera	Balyadimetopia		marci		Valid	Species	Y	Löcker & Larivière in Löcker, Fletcher, Larivière, Gurr, Holzinger and Löcker	2006	Löcker, B. & Larivière, M.-C. in Löcker, B., Fletcher, M.J., Larivière, M.-C., Gurr, G.M., Holzinger, W.E. & Löcker, H.	2	yes	1781	Löcker, B., Fletcher, M.J., Larivière, M.-C., Gurr, G.M., Holzinger, W.E. & Löcker, H. 2006. Taxonomic and phylogenetic revision of the Gelastocephalini (Hemiptera: Cixiidae). Invertebrate Systematics 20: 59-160	Article in Journal	Australia	no	Invertebrate Systematics	agency	CSIRO
Auchenorrhyncha	Hemiptera	Barbonia		spectabilis		Valid	Species	Y	Löcker & Larivière in Löcker, Fletcher, Larivière, Gurr, Holzinger and Löcker	2006	Löcker, B. & Larivière, M.-C. in Löcker, B., Fletcher, M.J., Larivière, M.-C., Gurr, G.M., Holzinger, W.E. & Löcker, H.	2	yes	1781	Löcker, B., Fletcher, M.J., Larivière, M.-C., Gurr, G.M., Holzinger, W.E. & Löcker, H. 2006. Taxonomic and phylogenetic revision of the Gelastocephalini (Hemiptera: Cixiidae). Invertebrate Systematics 20: 59-160	Article in Journal	Australia	no	Invertebrate Systematics	agency	CSIRO
Auchenorrhyncha	Hemiptera	Barsac		cinerascens		Valid	Species	Y	Fletcher	1988	Fletcher, M.J.	1	no	1041	Fletcher, M.J. 1988. The Australian genera of Flatidae (Homoptera: Fulgoroidea). General and Applied Entomology 20: 9-32	Article in Journal	Australia	yes	General and Applied Entomology	society	EntSocNSW
Auchenorrhyncha	Hemiptera	Barsac		cocoa		Valid	Species	Y	Fletcher	1988	Fletcher, M.J.	1	no	1041	Fletcher, M.J. 1988. The Australian genera of Flatidae (Homoptera: Fulgoroidea). General and Applied Entomology 20: 9-32	Article in Journal	Australia	yes	General and Applied Entomology	society	EntSocNSW
Auchenorrhyncha	Hemiptera	Barsac		excurva		Valid	Species	Y	Fletcher	1988	Fletcher, M.J.	1	no	1041	Fletcher, M.J. 1988. The Australian genera of Flatidae (Homoptera: Fulgoroidea). General and Applied Entomology 20: 9-32	Article in Journal	Australia	yes	General and Applied Entomology	society	EntSocNSW
Auchenorrhyncha	Hemiptera	Barsac		minima		Valid	Species	Y	Fletcher	1988	Fletcher, M.J.	1	no	1041	Fletcher, M.J. 1988. The Australian genera of Flatidae (Homoptera: Fulgoroidea). General and Applied Entomology 20: 9-32	Article in Journal	Australia	yes	General and Applied Entomology	society	EntSocNSW
Auchenorrhyncha	Hemiptera	Basilioterpa		fasciata		Valid	Species	N	Evans	1966	Evans, J.W.	1	no	955	Evans, J.W. 1966. The leafhoppers and froghoppers of Australia and New Zealand. Memoirs of the Australian Museum 12: 1-347	Article in Journal	Australia	no	Memoirs of the Australian Museum	museum	AusMus
Auchenorrhyncha	Hemiptera	Basilioterpa		pallida		Valid	Species	N	Evans	1966	Evans, J.W.	1	no	955	Evans, J.W. 1966. The leafhoppers and froghoppers of Australia and New Zealand. Memoirs of the Australian Museum 12: 1-347	Article in Journal	Australia	no	Memoirs of the Australian Museum	museum	AusMus
Auchenorrhyncha	Hemiptera	Batrachomorphus		croceus		Synonym of Thalattoscopus krusei Schmidt, 1930	Species	Y	Evans	1972	Evans, J.W.	1	no	961	Evans, J.W. 1972. Some leafhoppers from New Guinea, Australia and Thailand belonging to the subfamily Jassinae and a new genus from New Guinea referred to a new subfamily, the Acostemminae (Homoptera: Cicadellidae). Pacific Insects 14(4): 647-662	Article in Journal	USA	yes	Pacific Insects	na	na
Auchenorrhyncha	Hemiptera	Batrachomorphus		fasciatus		Synonym of Batracomorphus lentiginosus Kirkaldy, 1906	Species	Y	Evans	1972	Evans, J.W.	1	no	961	Evans, J.W. 1972. Some leafhoppers from New Guinea, Australia and Thailand belonging to the subfamily Jassinae and a new genus from New Guinea referred to a new subfamily, the Acostemminae (Homoptera: Cicadellidae). Pacific Insects 14(4): 647-662	Article in Journal	USA	yes	Pacific Insects	na	na
Auchenorrhyncha	Hemiptera	Batracomorphus		adventitiosus		Valid	Species	Y	Evans	1966	Evans, J.W.	1	no	955	Evans, J.W. 1966. The leafhoppers and froghoppers of Australia and New Zealand. Memoirs of the Australian Museum 12: 1-347	Article in Journal	Australia	no	Memoirs of the Australian Museum	museum	AusMus
Auchenorrhyncha	Hemiptera	Batracomorphus		atreus		Valid	Species	Y	Knight	1983	Knight, W.J.	1	no	1569	Knight, W.J. 1983. The leafhopper genus Batracomorphus (Cicadellidae) in the eastern Oriental and Australian Regions. Bulletin of the British Museum (Natural History) Entomology 47(2): 27-210	Article in Journal	UK	yes	Bulletin of the British Museum (Natural History) Entomology	na	na
Auchenorrhyncha	Hemiptera	Batracomorphus		brooksi		Valid	Species	Y	Evans	1972	Evans, J.W.	1	no	961	Evans, J.W. 1972. Some leafhoppers from New Guinea, Australia and Thailand belonging to the subfamily Jassinae and a new genus from New Guinea referred to a new subfamily, the Acostemminae (Homoptera: Cicadellidae). Pacific Insects 14(4): 647-662	Article in Journal	USA	yes	Pacific Insects	na	na
Auchenorrhyncha	Hemiptera	Batracomorphus		gressitti		Valid	Species	Y	Knight	1983	Knight, W.J.	1	no	1569	Knight, W.J. 1983. The leafhopper genus Batracomorphus (Cicadellidae) in the eastern Oriental and Australian Regions. Bulletin of the British Museum (Natural History) Entomology 47(2): 27-210	Article in Journal	UK	yes	Bulletin of the British Museum (Natural History) Entomology	na	na
Auchenorrhyncha	Hemiptera	Batracomorphus		hecate		Valid	Species	Y	Knight	1983	Knight, W.J.	1	no	1569	Knight, W.J. 1983. The leafhopper genus Batracomorphus (Cicadellidae) in the eastern Oriental and Australian Regions. Bulletin of the British Museum (Natural History) Entomology 47(2): 27-210	Article in Journal	UK	yes	Bulletin of the British Museum (Natural History) Entomology	na	na
Auchenorrhyncha	Hemiptera	Batracomorphus		icarus		Valid	Species	Y	Knight	1983	Knight, W.J.	1	no	1569	Knight, W.J. 1983. The leafhopper genus Batracomorphus (Cicadellidae) in the eastern Oriental and Australian Regions. Bulletin of the British Museum (Natural History) Entomology 47(2): 27-210	Article in Journal	UK	yes	Bulletin of the British Museum (Natural History) Entomology	na	na
Auchenorrhyncha	Hemiptera	Batracomorphus		latona		Valid	Species	Y	Knight	1983	Knight, W.J.	1	no	1569	Knight, W.J. 1983. The leafhopper genus Batracomorphus (Cicadellidae) in the eastern Oriental and Australian Regions. Bulletin of the British Museum (Natural History) Entomology 47(2): 27-210	Article in Journal	UK	yes	Bulletin of the British Museum (Natural History) Entomology	na	na
Auchenorrhyncha	Hemiptera	Batracomorphus		nervoviridis		Valid	Species	Y	Evans	1972	Evans, J.W.	1	no	961	Evans, J.W. 1972. Some leafhoppers from New Guinea, Australia and Thailand belonging to the subfamily Jassinae and a new genus from New Guinea referred to a new subfamily, the Acostemminae (Homoptera: Cicadellidae). Pacific Insects 14(4): 647-662	Article in Journal	USA	yes	Pacific Insects	na	na
Auchenorrhyncha	Hemiptera	Batracomorphus		orestes		Valid	Species	Y	Knight	1983	Knight, W.J.	1	no	1569	Knight, W.J. 1983. The leafhopper genus Batracomorphus (Cicadellidae) in the eastern Oriental and Australian Regions. Bulletin of the British Museum (Natural History) Entomology 47(2): 27-210	Article in Journal	UK	yes	Bulletin of the British Museum (Natural History) Entomology	na	na
Auchenorrhyncha	Hemiptera	Batracomorphus		palicus		Valid	Species	Y	Knight	1983	Knight, W.J.	1	no	1569	Knight, W.J. 1983. The leafhopper genus Batracomorphus (Cicadellidae) in the eastern Oriental and Australian Regions. Bulletin of the British Museum (Natural History) Entomology 47(2): 27-210	Article in Journal	UK	yes	Bulletin of the British Museum (Natural History) Entomology	na	na
Auchenorrhyncha	Hemiptera	Batracomorphus		pallas		Synonym of Batracomorphus lentiginosus Kirkaldy, 1906	Species	Y	Knight	1983	Knight, W.J.	1	no	1569	Knight, W.J. 1983. The leafhopper genus Batracomorphus (Cicadellidae) in the eastern Oriental and Australian Regions. Bulletin of the British Museum (Natural History) Entomology 47(2): 27-210	Article in Journal	UK	yes	Bulletin of the British Museum (Natural History) Entomology	na	na
Auchenorrhyncha	Hemiptera	Batracomorphus		samii		Valid	Species	Y	Evans	1972	Evans, J.W.	1	no	961	Evans, J.W. 1972. Some leafhoppers from New Guinea, Australia and Thailand belonging to the subfamily Jassinae and a new genus from New Guinea referred to a new subfamily, the Acostemminae (Homoptera: Cicadellidae). Pacific Insects 14(4): 647-662	Article in Journal	USA	yes	Pacific Insects	na	na
Auchenorrhyncha	Hemiptera	Batracomorphus		sarpedon		Valid	Species	Y	Knight	1983	Knight, W.J.	1	no	1569	Knight, W.J. 1983. The leafhopper genus Batracomorphus (Cicadellidae) in the eastern Oriental and Australian Regions. Bulletin of the British Museum (Natural History) Entomology 47(2): 27-210	Article in Journal	UK	yes	Bulletin of the British Museum (Natural History) Entomology	na	na
Auchenorrhyncha	Hemiptera	Batracomorphus		torquatus		Valid	Species	Y	Knight	1983	Knight, W.J.	1	no	1569	Knight, W.J. 1983. The leafhopper genus Batracomorphus (Cicadellidae) in the eastern Oriental and Australian Regions. Bulletin of the British Museum (Natural History) Entomology 47(2): 27-210	Article in Journal	UK	yes	Bulletin of the British Museum (Natural History) Entomology	na	na
Auchenorrhyncha	Hemiptera	Batracomorphus		tyndareus		Valid	Species	Y	Knight	1983	Knight, W.J.	1	no	1569	Knight, W.J. 1983. The leafhopper genus Batracomorphus (Cicadellidae) in the eastern Oriental and Australian Regions. Bulletin of the British Museum (Natural History) Entomology 47(2): 27-210	Article in Journal	UK	yes	Bulletin of the British Museum (Natural History) Entomology	na	na
Auchenorrhyncha	Hemiptera	Bharinka		storeyi		Valid	Species	Y	Webb	1983	Webb, M.D.	1	no	3237	Webb, M.D. 1983. Revision of the Australian Idiocerinae (Hemiptera: Homoptera: Cicadellidae). Australian Journal of Zoology Supplementary Series 92: 1-147	Article in Journal	Australia	no	Australian Journal of Zoology Supplementary Series	agency	CSIRO
Auchenorrhyncha	Hemiptera	Bharoopra		clavosignata		Valid	Species	Y	Webb	1983	Webb, M.D.	1	no	3237	Webb, M.D. 1983. Revision of the Australian Idiocerinae (Hemiptera: Homoptera: Cicadellidae). Australian Journal of Zoology Supplementary Series 92: 1-147	Article in Journal	Australia	no	Australian Journal of Zoology Supplementary Series	agency	CSIRO
Auchenorrhyncha	Hemiptera	Bilbilis		caligula		Valid	Species	Y	Fennah	1984	Fennah, R.G.	1	no	1024	Fennah, R.G. 1984. Revisionary notes on the classification of the Nogodinidae (Homoptera, Fulgoroidea), with descriptions of a new genus and a new species. Entomologist's Monthly Magazine 120: 81-86	Article in Journal	UK	yes	Entomologist's Monthly Magazine	na	na
Auchenorrhyncha	Hemiptera	Borditartessus		casulaensis		Valid	Species	Y	Evans	1981	Evans, F.	1	no	931	Evans, F. 1981. The Tartessinae of Australia, New Guinea and some adjacent Islands (Homoptera: Cicadellidae). Pacific Insects 23(1-2): 112-188	Article in Journal	USA	yes	Pacific Insects	na	na
Auchenorrhyncha	Hemiptera	Brunotartessus		cunnamullensis		Valid	Species	Y	Evans	1981	Evans, F.	1	no	931	Evans, F. 1981. The Tartessinae of Australia, New Guinea and some adjacent Islands (Homoptera: Cicadellidae). Pacific Insects 23(1-2): 112-188	Article in Journal	USA	yes	Pacific Insects	na	na
Auchenorrhyncha	Hemiptera	Brunotartessus		darwinensis		Valid	Species	Y	Evans	1981	Evans, F.	1	no	931	Evans, F. 1981. The Tartessinae of Australia, New Guinea and some adjacent Islands (Homoptera: Cicadellidae). Pacific Insects 23(1-2): 112-188	Article in Journal	USA	yes	Pacific Insects	na	na
Auchenorrhyncha	Hemiptera	Brunotartessus		eldoensis		Valid	Species	Y	Evans	1981	Evans, F.	1	no	931	Evans, F. 1981. The Tartessinae of Australia, New Guinea and some adjacent Islands (Homoptera: Cicadellidae). Pacific Insects 23(1-2): 112-188	Article in Journal	USA	yes	Pacific Insects	na	na
Auchenorrhyncha	Hemiptera	Brunotartessus		weiri		Valid	Species	Y	Evans	1981	Evans, F.	1	no	931	Evans, F. 1981. The Tartessinae of Australia, New Guinea and some adjacent Islands (Homoptera: Cicadellidae). Pacific Insects 23(1-2): 112-188	Article in Journal	USA	yes	Pacific Insects	na	na
Auchenorrhyncha	Hemiptera	Budginmaya		eulae		Valid	Species	Y	Fletcher & Moir	2009	Fletcher, M.J. & Moir, M.L.	2	no	1055	Fletcher, M.J. & Moir, M.L. 2009. Budginmaya eulae gen. et sp. nov., a myrmecophilous planthopper (Hemiptera: Fulgoromorpha: Flatidae) from Western Australia. Australian Journal of Entomology 48(1): 36-39	Article in Journal	Australia	yes	Australian Journal of Entomology	society	AustEntSoc
Auchenorrhyncha	Hemiptera	Bulotartessus		ambiguus		Valid	Species	Y	Evans	1981	Evans, F.	1	no	931	Evans, F. 1981. The Tartessinae of Australia, New Guinea and some adjacent Islands (Homoptera: Cicadellidae). Pacific Insects 23(1-2): 112-188	Article in Journal	USA	yes	Pacific Insects	na	na
Auchenorrhyncha	Hemiptera	Bulotartessus		cooloolensis		Valid	Species	Y	Evans	1981	Evans, F.	1	no	931	Evans, F. 1981. The Tartessinae of Australia, New Guinea and some adjacent Islands (Homoptera: Cicadellidae). Pacific Insects 23(1-2): 112-188	Article in Journal	USA	yes	Pacific Insects	na	na
Auchenorrhyncha	Hemiptera	Bundabrilla		clovella		Valid	Species	Y	Webb	1983	Webb, M.D.	1	no	3237	Webb, M.D. 1983. Revision of the Australian Idiocerinae (Hemiptera: Homoptera: Cicadellidae). Australian Journal of Zoology Supplementary Series 92: 1-147	Article in Journal	Australia	no	Australian Journal of Zoology Supplementary Series	agency	CSIRO
Auchenorrhyncha	Hemiptera	Burbunga		nanda		Valid	Species	N	Burns	1964	Burns, A.N.	1	no	507	Burns, A.N. 1964. Revision of the genus Macrotristria Stål (Cicadidae-Homoptera-Hemiptera) with descriptions of new species. Memoirs of the National Museum of Victoria 26: 77-123	Article in Journal	Australia	no	Memoirs of the National Museum of Victoria	museum	MusVic
Auchenorrhyncha	Hemiptera	Burbunga		parva		Valid	Species	Y	Moulds	1994	Moulds, M.S.	1	no	2107	Moulds, M.S. 1994. The identity of Burbunga gilmorei (Distant) and B. inornata Distant (Hemiptera: Cicadidae) with descriptions of two allied new species. Journal of the Australian Entomological Society 33: 97-103	Article in Journal	Australia	yes	Journal of the Australian Entomological Society	society	AustEntSoc
Auchenorrhyncha	Hemiptera	Burbunga		queenslandica		Valid	Species	Y	Moulds	1994	Moulds, M.S.	1	no	2107	Moulds, M.S. 1994. The identity of Burbunga gilmorei (Distant) and B. inornata Distant (Hemiptera: Cicadidae) with descriptions of two allied new species. Journal of the Australian Entomological Society 33: 97-103	Article in Journal	Australia	yes	Journal of the Australian Entomological Society	society	AustEntSoc
Auchenorrhyncha	Hemiptera	Busoniomimus		annulatus		Valid	Species	Y	Webb	1983	Webb, M.D.	1	no	3237	Webb, M.D. 1983. Revision of the Australian Idiocerinae (Hemiptera: Homoptera: Cicadellidae). Australian Journal of Zoology Supplementary Series 92: 1-147	Article in Journal	Australia	no	Australian Journal of Zoology Supplementary Series	agency	CSIRO
Auchenorrhyncha	Hemiptera	Caliginopsalta		percola		Valid	Species	Y	Ewart	2005	Ewart, A.	1	no	971	Ewart, A. 2005. New genera and species of small ticking and 'chirping' cicadas (Hemiptera: Cicadoidea: Cicadidae) from Queensland, with descriptions of their songs. Memoirs of the Queensland Museum 51(2): 439-500	Article in Journal	Australia	no	Memoirs of the Queensland Museum	museum	QldMus
Auchenorrhyncha	Hemiptera	Calotettix		lais		Synonym of Dryadomorpha metrosideri Osborn, 1934	Species	Y	Eyles & Linnavuori	1974	Eyles, A.C. & Linnavuori, R.E.	2	no	1012	Eyles, A.C. & Linnavuori, R. 1974. Cicadellidae and Issidae (Homoptera) of Niue Island, and material from the Cook Islands. New Zealand Journal of Zoology 1 1: 29-44	Article in Journal	New Zealand	no	New Zealand Journal of Zoology	na	na
Auchenorrhyncha	Hemiptera	Candicarina		geroldi		Valid	Species	Y	Löcker & Larivière in Löcker, Fletcher, Larivière, Gurr, Holzinger and Löcker	2006	Löcker, B. & Larivière, M.-C. in Löcker, B., Fletcher, M.J., Larivière, M.-C., Gurr, G.M., Holzinger, W.E. & Löcker, H.	2	yes	1781	Löcker, B., Fletcher, M.J., Larivière, M.-C., Gurr, G.M., Holzinger, W.E. & Löcker, H. 2006. Taxonomic and phylogenetic revision of the Gelastocephalini (Hemiptera: Cixiidae). Invertebrate Systematics 20: 59-160	Article in Journal	Australia	no	Invertebrate Systematics	agency	CSIRO
Auchenorrhyncha	Hemiptera	Candicarina		pulchra		Valid	Species	Y	Löcker & Larivière in Löcker, Fletcher, Larivière, Gurr, Holzinger and Löcker	2006	Löcker, B. & Larivière, M.-C. in Löcker, B., Fletcher, M.J., Larivière, M.-C., Gurr, G.M., Holzinger, W.E. & Löcker, H.	2	yes	1781	Löcker, B., Fletcher, M.J., Larivière, M.-C., Gurr, G.M., Holzinger, W.E. & Löcker, H. 2006. Taxonomic and phylogenetic revision of the Gelastocephalini (Hemiptera: Cixiidae). Invertebrate Systematics 20: 59-160	Article in Journal	Australia	no	Invertebrate Systematics	agency	CSIRO
Auchenorrhyncha	Hemiptera	Candulifera		rapea		Valid	Species	Y	Webb	1983	Webb, M.D.	1	no	3237	Webb, M.D. 1983. Revision of the Australian Idiocerinae (Hemiptera: Homoptera: Cicadellidae). Australian Journal of Zoology Supplementary Series 92: 1-147	Article in Journal	Australia	no	Australian Journal of Zoology Supplementary Series	agency	CSIRO
Auchenorrhyncha	Hemiptera	Carolus		carinatus		Valid	Species	Y	Löcker & Larivière in Löcker, Fletcher, Larivière, Gurr, Holzinger and Löcker	2006	Löcker, B. & Larivière, M.-C. in Löcker, B., Fletcher, M.J., Larivière, M.-C., Gurr, G.M., Holzinger, W.E. & Löcker, H.	2	yes	1781	Löcker, B., Fletcher, M.J., Larivière, M.-C., Gurr, G.M., Holzinger, W.E. & Löcker, H. 2006. Taxonomic and phylogenetic revision of the Gelastocephalini (Hemiptera: Cixiidae). Invertebrate Systematics 20: 59-160	Article in Journal	Australia	no	Invertebrate Systematics	agency	CSIRO
Auchenorrhyncha	Hemiptera	Carolus		stiriae		Valid	Species	Y	Löcker & Larivière in Löcker, Fletcher, Larivière, Gurr, Holzinger and Löcker	2006	Löcker, B. & Larivière, M.-C. in Löcker, B., Fletcher, M.J., Larivière, M.-C., Gurr, G.M., Holzinger, W.E. & Löcker, H.	2	yes	1781	Löcker, B., Fletcher, M.J., Larivière, M.-C., Gurr, G.M., Holzinger, W.E. & Löcker, H. 2006. Taxonomic and phylogenetic revision of the Gelastocephalini (Hemiptera: Cixiidae). Invertebrate Systematics 20: 59-160	Article in Journal	Australia	no	Invertebrate Systematics	agency	CSIRO
Auchenorrhyncha	Hemiptera	Carvaka		elegantula		Valid	Species	N	Evans	1966	Evans, J.W.	1	no	955	Evans, J.W. 1966. The leafhoppers and froghoppers of Australia and New Zealand. Memoirs of the Australian Museum 12: 1-347	Article in Journal	Australia	no	Memoirs of the Australian Museum	museum	AusMus
Auchenorrhyncha	Hemiptera	Carvaka		flava		Valid	Species	Y	Fletcher & Semeraro	2007	Fletcher, M.J. & Semeraro, L.	2	no	1057	Fletcher, M.J. & Semeraro, L. 2007. Genus Carvaka Distant in Australia (Hemiptera: Cicadellidae: Selenocephalinae). Australian Journal of Entomology 46(2): 89-95	Article in Journal	Australia	yes	Australian Journal of Entomology	society	AustEntSoc
Auchenorrhyncha	Hemiptera	Carvaka		fulvida		Synonym of Carvaka contempta Kirkaldy, 1906	Species	Y	Evans	1966	Evans, J.W.	1	no	955	Evans, J.W. 1966. The leafhoppers and froghoppers of Australia and New Zealand. Memoirs of the Australian Museum 12: 1-347	Article in Journal	Australia	no	Memoirs of the Australian Museum	museum	AusMus
Auchenorrhyncha	Hemiptera	Carvaka		maculata		Valid	Species	Y	Fletcher & Semeraro	2007	Fletcher, M.J. & Semeraro, L.	2	no	1057	Fletcher, M.J. & Semeraro, L. 2007. Genus Carvaka Distant in Australia (Hemiptera: Cicadellidae: Selenocephalinae). Australian Journal of Entomology 46(2): 89-95	Article in Journal	Australia	yes	Australian Journal of Entomology	society	AustEntSoc
Auchenorrhyncha	Hemiptera	Carvaka		mouldsorum		Valid	Species	Y	Fletcher & Semeraro	2007	Fletcher, M.J. & Semeraro, L.	2	no	1057	Fletcher, M.J. & Semeraro, L. 2007. Genus Carvaka Distant in Australia (Hemiptera: Cicadellidae: Selenocephalinae). Australian Journal of Entomology 46(2): 89-95	Article in Journal	Australia	yes	Australian Journal of Entomology	society	AustEntSoc
Auchenorrhyncha	Hemiptera	Carystoterpa		fusiformis		Valid	Species	Y	Hamilton & Morales	1992	Hamilton, K.G.A. & Morales, C.F.	2	no	1216	Hamilton, K.G.A. & Morales, C.F. 1992. Cercopidae (Insecta: Homoptera). Fauna of New Zealand 25: 1-35	Article in Journal	New Zealand	no	Fauna of New Zealand	na	na
Auchenorrhyncha	Hemiptera	Ceraon		pix		Valid	Species	Y	Kitching	1976	Kitching, R.L.	1	no	1555	Kitching, R.L. 1976. The genus Ceraon Buckton (Homoptera: Membracidae) with description of a new species and notes on genitalic nomenclature. Journal of the Australian Entomological Society 14: 339-351	Article in Journal	Australia	yes	Journal of the Australian Entomological Society	society	AustEntSoc
Auchenorrhyncha	Hemiptera	Chaetophyes		pulcherrima		Valid	Species	Y	Evans	1970	Evans, J.W.	1	no	958	Evans, J.W. 1970. A new species of Machaerotidae from Australia (Homoptera: Cercopoidea). Proceedings of the Royal Society of Queensland 81(8): 83-84	Article in Journal	Australia	no	Proceedings of the Royal Society of Queensland	society	RoySocQld
Auchenorrhyncha	Hemiptera	Chewobrachys		limbourgi		Valid	Species	Y	Constant	2008	Constant, J.	1	no	668	Constant, J. 2008. Revision of the Eurybrachidae (XIII). The new Australian genus Chewobrachys (Hemiptera: Fulgoromorpha). Zootaxa 1898: 41-54	Article in Journal	New Zealand	no	Zootaxa	na	na
Auchenorrhyncha	Hemiptera	Chidaea		dayi		Valid	Species	Y	Emeljanov	2000	Emeljanov, A.F.	1	no	906	Emeljanov, A.F. 2000. New genera of the family Cixiidae (Homoptera, Fulgoroidea) from Australia and neighbouring Territories. Entomologicheskoe Obozrenie (English translation as Entomological Reviews) 79(1): 12-34	Article in Journal	Russia	yes	Entomologicheskoe Obozrenie	na	na
Auchenorrhyncha	Hemiptera	Chinaella		pingellensis		Valid	Species	Y	Evans	1972	Evans, J.W.	1	no	960	Evans, J.W. 1972. Characteristics and relationships of the Penthimiinae and some new genera and new species from New Guinea and Australia; also new species of Drabescinae from New Guinea and Australia. Pacific Insects 14(1): 169-200	Article in Journal	USA	yes	Pacific Insects	na	na
Auchenorrhyncha	Hemiptera	Chlamydopteryx		mammoides		Valid	Species	Y	Gnezdilov & Fletcher	2010	Gnezdilov, V.M. & Fletcher, M.J.	2	no	1143	Gnezdilov, V.M. & Fletcher, M.J. 2010. A review of the Australian genera of the planthopper family Issidae (Hemiptera: Fulgoromorpha) with description of an unusual new species of Chlamydopteryx Kirkaldy. Zootaxa 2366: 35-45	Article in Journal	New Zealand	no	Zootaxa	na	na
Auchenorrhyncha	Hemiptera	Chrysocicada		franceaustralae		Valid	Species	Y	Boulard	1989	Boulard, M	1	no	378	Boulard, M 1989. Expedition France-Australe (5 juillet-5 aout 1988). Participation entomologique. Compte-Rendu de Mission en Australie Occidentale. Ecole pratique des hautes Etudes, travaux du Laboratoire Biologie et Evolution des Insectes Hemipteroidea 2: 55-82 [Reproduced in part in English with minor amendments, 1990]	Article in Journal	France	yes	Ecole pratique des hautes Etudes, travaux du Laboratoire Biologie et Evolution des Insectes Hemipteroidea	na	na
Auchenorrhyncha	Hemiptera	Chunra		australis		Valid	Species	Y	Webb	1983	Webb, M.D.	1	no	3237	Webb, M.D. 1983. Revision of the Australian Idiocerinae (Hemiptera: Homoptera: Cicadellidae). Australian Journal of Zoology Supplementary Series 92: 1-147	Article in Journal	Australia	no	Australian Journal of Zoology Supplementary Series	agency	CSIRO
Auchenorrhyncha	Hemiptera	Cleotyche		mariae		Valid	Species	Y	Emeljanov	1997	Emeljanov, A.F.	1	no	905	Emeljanov, A.F. 1997. A new genus and species of the Dictyopharidae from Australia belonging to a new tribe (Homoptera: Cicadina). Zoosystematica Rossica 6(1/2): 77-82	Article in Journal	Russia	no	Zoosystematica Rossica	na	na
Auchenorrhyncha	Hemiptera	Cordoliarus		mareebensis		Valid	Species	Y	Löcker in Löcker, Fletcher, Larivière & Gurr	2006	Löcker, B. in Löcker, B., Fletcher, M.J., Larivière, M.-C. & Gurr, G.M.	1	yes	1780	Löcker, B., Fletcher, M.J., Larivière, M.-C. & Gurr, G.M. 2006. The Australian Pentastirini (Hemiptera: Fulgoromorpha: Cixiidae). Zootaxa 1290: 1-138	Article in Journal	New Zealand	no	Zootaxa	na	na
Auchenorrhyncha	Hemiptera	Cornutipo		bakeri		Valid	Species	Y	Evans	1969	Evans, J.W.	1	no	957	Evans, J.W. 1969. Notes on the Eurymelidae (Homoptera; Cicadelloidea) and some new species from Eastern and Western Australia. Proceedings of the Royal Society of Queensland 81(4): 51-55	Article in Journal	Australia	no	Proceedings of the Royal Society of Queensland	society	RoySocQld
Auchenorrhyncha	Hemiptera	Corylonga		aaroni		Valid	Species	Y	Löcker & Fletcher in Löcker, Fletcher, Larivière, Gurr, Holzinger and Löcker	2006	Löcker, B. & Fletcher, M.J. in Löcker, B., Fletcher, M.J., Larivière, M.-C., Gurr, G.M., Holzinger, W.E. & Löcker, H.	2	yes	1781	Löcker, B., Fletcher, M.J., Larivière, M.-C., Gurr, G.M., Holzinger, W.E. & Löcker, H. 2006. Taxonomic and phylogenetic revision of the Gelastocephalini (Hemiptera: Cixiidae). Invertebrate Systematics 20: 59-160	Article in Journal	Australia	no	Invertebrate Systematics	agency	CSIRO
Auchenorrhyncha	Hemiptera	Corylonga		krottendorfi		Valid	Species	Y	Löcker & Fletcher in Löcker, Fletcher, Larivière, Gurr, Holzinger and Löcker	2006	Löcker, B. & Fletcher, M.J. in Löcker, B., Fletcher, M.J., Larivière, M.-C., Gurr, G.M., Holzinger, W.E. & Löcker, H.	2	yes	1781	Löcker, B., Fletcher, M.J., Larivière, M.-C., Gurr, G.M., Holzinger, W.E. & Löcker, H. 2006. Taxonomic and phylogenetic revision of the Gelastocephalini (Hemiptera: Cixiidae). Invertebrate Systematics 20: 59-160	Article in Journal	Australia	no	Invertebrate Systematics	agency	CSIRO
Auchenorrhyncha	Hemiptera	Corylonga		leighi		Valid	Species	Y	Löcker & Fletcher in Löcker, Fletcher, Larivière, Gurr, Holzinger and Löcker	2006	Löcker, B. & Fletcher, M.J. in Löcker, B., Fletcher, M.J., Larivière, M.-C., Gurr, G.M., Holzinger, W.E. & Löcker, H.	2	yes	1781	Löcker, B., Fletcher, M.J., Larivière, M.-C., Gurr, G.M., Holzinger, W.E. & Löcker, H. 2006. Taxonomic and phylogenetic revision of the Gelastocephalini (Hemiptera: Cixiidae). Invertebrate Systematics 20: 59-160	Article in Journal	Australia	no	Invertebrate Systematics	agency	CSIRO
Auchenorrhyncha	Hemiptera	Corylonga		lobata		Valid	Species	Y	Löcker & Fletcher in Löcker, Fletcher, Larivière, Gurr, Holzinger and Löcker	2006	Löcker, B. & Fletcher, M.J. in Löcker, B., Fletcher, M.J., Larivière, M.-C., Gurr, G.M., Holzinger, W.E. & Löcker, H.	2	yes	1781	Löcker, B., Fletcher, M.J., Larivière, M.-C., Gurr, G.M., Holzinger, W.E. & Löcker, H. 2006. Taxonomic and phylogenetic revision of the Gelastocephalini (Hemiptera: Cixiidae). Invertebrate Systematics 20: 59-160	Article in Journal	Australia	no	Invertebrate Systematics	agency	CSIRO
Auchenorrhyncha	Hemiptera	Corylonga		loisae		Valid	Species	Y	Löcker & Fletcher in Löcker, Fletcher, Larivière, Gurr, Holzinger and Löcker	2006	Löcker, B. & Fletcher, M.J. in Löcker, B., Fletcher, M.J., Larivière, M.-C., Gurr, G.M., Holzinger, W.E. & Löcker, H.	2	yes	1781	Löcker, B., Fletcher, M.J., Larivière, M.-C., Gurr, G.M., Holzinger, W.E. & Löcker, H. 2006. Taxonomic and phylogenetic revision of the Gelastocephalini (Hemiptera: Cixiidae). Invertebrate Systematics 20: 59-160	Article in Journal	Australia	no	Invertebrate Systematics	agency	CSIRO
Auchenorrhyncha	Hemiptera	Corylonga		mahmudae		Valid	Species	Y	Löcker & Fletcher in Löcker, Fletcher, Larivière, Gurr, Holzinger and Löcker	2006	Löcker, B. & Fletcher, M.J. in Löcker, B., Fletcher, M.J., Larivière, M.-C., Gurr, G.M., Holzinger, W.E. & Löcker, H.	2	yes	1781	Löcker, B., Fletcher, M.J., Larivière, M.-C., Gurr, G.M., Holzinger, W.E. & Löcker, H. 2006. Taxonomic and phylogenetic revision of the Gelastocephalini (Hemiptera: Cixiidae). Invertebrate Systematics 20: 59-160	Article in Journal	Australia	no	Invertebrate Systematics	agency	CSIRO
Auchenorrhyncha	Hemiptera	Corylonga		triangula		Valid	Species	Y	Löcker & Fletcher in Löcker, Fletcher, Larivière, Gurr, Holzinger and Löcker	2006	Löcker, B. & Fletcher, M.J. in Löcker, B., Fletcher, M.J., Larivière, M.-C., Gurr, G.M., Holzinger, W.E. & Löcker, H.	2	yes	1781	Löcker, B., Fletcher, M.J., Larivière, M.-C., Gurr, G.M., Holzinger, W.E. & Löcker, H. 2006. Taxonomic and phylogenetic revision of the Gelastocephalini (Hemiptera: Cixiidae). Invertebrate Systematics 20: 59-160	Article in Journal	Australia	no	Invertebrate Systematics	agency	CSIRO
Auchenorrhyncha	Hemiptera	Crotopsalta		fronsecetes		Valid	Species	Y	Ewart	2005	Ewart, A.	1	no	971	Ewart, A. 2005. New genera and species of small ticking and 'chirping' cicadas (Hemiptera: Cicadoidea: Cicadidae) from Queensland, with descriptions of their songs. Memoirs of the Queensland Museum 51(2): 439-500	Article in Journal	Australia	no	Memoirs of the Queensland Museum	museum	QldMus
Auchenorrhyncha	Hemiptera	Crotopsalta		leptotigris		Valid	Species	Y	Ewart	2009	Ewart, A.	1	no	972	Ewart, A. 2009. Crotopsalta leptotigris, a new species of ticking cicada (Hemiptera: Cicadoidea: Cicadidae) from Cravens Peak, Southwest Queensland. Australian Entomologist 36(3): 139 - 151	Article in Journal	Australia	yes	Australian Entomologist	society	EntSocQld
Auchenorrhyncha	Hemiptera	Crotopsalta		plexis		Valid	Species	Y	Ewart	2005	Ewart, A.	1	no	971	Ewart, A. 2005. New genera and species of small ticking and 'chirping' cicadas (Hemiptera: Cicadoidea: Cicadidae) from Queensland, with descriptions of their songs. Memoirs of the Queensland Museum 51(2): 439-500	Article in Journal	Australia	no	Memoirs of the Queensland Museum	museum	QldMus
Auchenorrhyncha	Hemiptera	Crotopsalta		poaecetes		Valid	Species	Y	Ewart	2005	Ewart, A.	1	no	971	Ewart, A. 2005. New genera and species of small ticking and 'chirping' cicadas (Hemiptera: Cicadoidea: Cicadidae) from Queensland, with descriptions of their songs. Memoirs of the Queensland Museum 51(2): 439-500	Article in Journal	Australia	no	Memoirs of the Queensland Museum	museum	QldMus
Auchenorrhyncha	Hemiptera	Crotopsalta		strenulum		Valid	Species	Y	Ewart	2005	Ewart, A.	1	no	971	Ewart, A. 2005. New genera and species of small ticking and 'chirping' cicadas (Hemiptera: Cicadoidea: Cicadidae) from Queensland, with descriptions of their songs. Memoirs of the Queensland Museum 51(2): 439-500	Article in Journal	Australia	no	Memoirs of the Queensland Museum	museum	QldMus
Auchenorrhyncha	Hemiptera	Cryptobarsac		rubriops		Valid	Species	Y	Fletcher & Moir	2002	Fletcher, M.J. & Moir, M.L.	2	no	1053	Fletcher, M.J. & Moir, M.L. 2002. Cryptobarsac rubriops, a new genus and species of selizine Flatidae (Hemiptera: Fulgoromorpha) from grasstrees (Xanthorrhoea preissii) in south Western Australia. Records of the Western Australian Museum 21(3): 221-225	Article in Journal	Australia	no	Records of the Western Australian Museum	museum	WAMus
Auchenorrhyncha	Hemiptera	Daymfus		montanus		Valid	Species	N	Day	1999	Day, M.F.	1	no	760	Day, M.F. 1999. The genera of Australian Membracidae (Hemiptera : Auchenorrhyncha). Invertebrate Taxonomy 13: 629-747	Article in Journal	Australia	no	Invertebrate Taxonomy	agency	CSIRO
Auchenorrhyncha	Hemiptera	Deltocephalus		viridellus		Valid	Species	Y	Evans	1966	Evans, J.W.	1	no	955	Evans, J.W. 1966. The leafhoppers and froghoppers of Australia and New Zealand. Memoirs of the Australian Museum 12: 1-347	Article in Journal	Australia	no	Memoirs of the Australian Museum	museum	AusMus
Auchenorrhyncha	Hemiptera	Desudaboides		fletcheri		Valid	Species	Y	Constant	2010	Constant, J.	1	no	669	Constant, J. 2010. Review of the Australian genus Desudaboides Musgrave with descriptions of four new species (Hemiptera: Fulgoromorpha: Fulgoridae). Zootaxa (2351): 39-48	Article in Journal	New Zealand	no	Zootaxa	na	na
Auchenorrhyncha	Hemiptera	Desudaboides		melindae		Valid	Species	Y	Constant	2010	Constant, J.	1	no	669	Constant, J. 2010. Review of the Australian genus Desudaboides Musgrave with descriptions of four new species (Hemiptera: Fulgoromorpha: Fulgoridae). Zootaxa (2351): 39-48	Article in Journal	New Zealand	no	Zootaxa	na	na
Auchenorrhyncha	Hemiptera	Desudaboides		nigrifrons		Valid	Species	Y	Constant	2010	Constant, J.	1	no	669	Constant, J. 2010. Review of the Australian genus Desudaboides Musgrave with descriptions of four new species (Hemiptera: Fulgoromorpha: Fulgoridae). Zootaxa (2351): 39-48	Article in Journal	New Zealand	no	Zootaxa	na	na
Auchenorrhyncha	Hemiptera	Desudaboides		rentzi		Valid	Species	Y	Constant	2010	Constant, J.	1	no	669	Constant, J. 2010. Review of the Australian genus Desudaboides Musgrave with descriptions of four new species (Hemiptera: Fulgoromorpha: Fulgoridae). Zootaxa (2351): 39-48	Article in Journal	New Zealand	no	Zootaxa	na	na
Auchenorrhyncha	Hemiptera	Dhongariva		spinosa		Valid	Species	Y	Webb	1983	Webb, M.D.	1	no	3237	Webb, M.D. 1983. Revision of the Australian Idiocerinae (Hemiptera: Homoptera: Cicadellidae). Australian Journal of Zoology Supplementary Series 92: 1-147	Article in Journal	Australia	no	Australian Journal of Zoology Supplementary Series	agency	CSIRO
Auchenorrhyncha	Hemiptera	Dilacreon	Dilacreon	akethe		Valid	Species	Y	Löcker in Löcker, Fletcher & Gurr	2010	Löcker, B. in Löcker, B., Fletcher, M.J. & Gurr, G.M.	1	yes	1778	Löcker, B., Fletcher, M.J. & Gurr, G.M. 2010. Taxonomic revision of the Australian Eucarpiini (Hemiptera: Fulgoromorpha: Cixiidae) with the description of nine new species. Zootaxa 2425: 1-31	Article in Journal	New Zealand	no	Zootaxa	na	na
Auchenorrhyncha	Hemiptera	Dilacreon	Dilacreon	ispi		Valid	Species	Y	Löcker in Löcker, Fletcher & Gurr	2010	Löcker, B. in Löcker, B., Fletcher, M.J. & Gurr, G.M.	1	yes	1778	Löcker, B., Fletcher, M.J. & Gurr, G.M. 2010. Taxonomic revision of the Australian Eucarpiini (Hemiptera: Fulgoromorpha: Cixiidae) with the description of nine new species. Zootaxa 2425: 1-31	Article in Journal	New Zealand	no	Zootaxa	na	na
Auchenorrhyncha	Hemiptera	Dipsiathus		obscurifrons		Valid	Species	Y	Emeljanov	2005	Emeljanov, A.F.	1	no	907	Emeljanov, A.F. 2005. New genera and species of the Family Achilidae (Homoptera). Entomologicheskoe Obozrenie (English translation as Entomological Reviews) 84 1: 10-45	Article in Journal	Russia	yes	Entomologicheskoe Obozrenie	na	na
Auchenorrhyncha	Hemiptera	Dipsiathus		pallidifrons		Valid	Species	Y	Emeljanov	2005	Emeljanov, A.F.	1	no	907	Emeljanov, A.F. 2005. New genera and species of the Family Achilidae (Homoptera). Entomologicheskoe Obozrenie (English translation as Entomological Reviews) 84 1: 10-45	Article in Journal	Russia	yes	Entomologicheskoe Obozrenie	na	na
Auchenorrhyncha	Hemiptera	Doowella		wanungarae		Valid	Species	N	Evans	1966	Evans, J.W.	1	no	955	Evans, J.W. 1966. The leafhoppers and froghoppers of Australia and New Zealand. Memoirs of the Australian Museum 12: 1-347	Article in Journal	Australia	no	Memoirs of the Australian Museum	museum	AusMus
Auchenorrhyncha	Hemiptera	Dorrotartessus		dorrigensis		Valid	Species	Y	Evans	1981	Evans, F.	1	no	931	Evans, F. 1981. The Tartessinae of Australia, New Guinea and some adjacent Islands (Homoptera: Cicadellidae). Pacific Insects 23(1-2): 112-188	Article in Journal	USA	yes	Pacific Insects	na	na
Auchenorrhyncha	Hemiptera	Drabescus		heroni		Synonym of Drabescus samoanus Osborn, 1934	Species	Y	Evans	1966	Evans, J.W.	1	no	955	Evans, J.W. 1966. The leafhoppers and froghoppers of Australia and New Zealand. Memoirs of the Australian Museum 12: 1-347	Article in Journal	Australia	no	Memoirs of the Australian Museum	museum	AusMus
Auchenorrhyncha	Hemiptera	Drabescus		palmerstoni		Synonym of Drabescus samoanus Osborn, 1934	Species	Y	Evans	1972	Evans, J.W.	1	no	960	Evans, J.W. 1972. Characteristics and relationships of the Penthimiinae and some new genera and new species from New Guinea and Australia; also new species of Drabescinae from New Guinea and Australia. Pacific Insects 14(1): 169-200	Article in Journal	USA	yes	Pacific Insects	na	na
Auchenorrhyncha	Hemiptera	Dremuela		hieroglyphica		Valid	Species	Y	Evans	1966	Evans, J.W.	1	no	955	Evans, J.W. 1966. The leafhoppers and froghoppers of Australia and New Zealand. Memoirs of the Australian Museum 12: 1-347	Article in Journal	Australia	no	Memoirs of the Australian Museum	museum	AusMus
Auchenorrhyncha	Hemiptera	Drymopsalta		crepitum		Valid	Species	Y	Ewart	2005	Ewart, A.	1	no	971	Ewart, A. 2005. New genera and species of small ticking and 'chirping' cicadas (Hemiptera: Cicadoidea: Cicadidae) from Queensland, with descriptions of their songs. Memoirs of the Queensland Museum 51(2): 439-500	Article in Journal	Australia	no	Memoirs of the Queensland Museum	museum	QldMus
Auchenorrhyncha	Hemiptera	Dunioa		picturata		Valid	Species	N	Evans	1966	Evans, J.W.	1	no	955	Evans, J.W. 1966. The leafhoppers and froghoppers of Australia and New Zealand. Memoirs of the Australian Museum 12: 1-347	Article in Journal	Australia	no	Memoirs of the Australian Museum	museum	AusMus
Auchenorrhyncha	Hemiptera	Dziwneono		alfa		Valid	Species	Y	Dworakowska	1993	Dworakowska, I.	1	no	884	Dworakowska, I. 1993. Fusiplata Ahmed and some other Dikraneurini (Insecta, Auchenorrhyncha, Cicadellidae: Typhlocybinae). Entomologische Abhandlungen. Staatliches Museum für Tierkunde Dresden 55(2): 97-139	Article in Journal	Germany	yes	Entomologische Abhandlungen, Staatliches Museum für Tierkunde Dresden	na	na
Auchenorrhyncha	Hemiptera	Dziwneono		etcetera		Valid	Species	Y	Dworakowska	1972	Dworakowska, I.	1	no	882	Dworakowska, I. 1972. Australian Dikraneurini (Auchenorrhyncha: Cicadellidae: Typhlocybinae). Bulletin de l'Académie Polonaise des Sciences. Série des Sciences Biologiques 20(3): 193-201	Article in Journal	Poland	no	Bulletin de l'Académie Polonaise des Sciences, Série des Sciences Biologiques	na	na
Auchenorrhyncha	Hemiptera	Dziwneono		olszewskii		Valid	Species	Y	Dworakowska	1972	Dworakowska, I.	1	no	882	Dworakowska, I. 1972. Australian Dikraneurini (Auchenorrhyncha: Cicadellidae: Typhlocybinae). Bulletin de l'Académie Polonaise des Sciences. Série des Sciences Biologiques 20(3): 193-201	Article in Journal	Poland	no	Bulletin de l'Académie Polonaise des Sciences, Série des Sciences Biologiques	na	na
Auchenorrhyncha	Hemiptera	Dziwneono		sagittata		Valid	Species	Y	Dworakowska	1993	Dworakowska, I.	1	no	884	Dworakowska, I. 1993. Fusiplata Ahmed and some other Dikraneurini (Insecta, Auchenorrhyncha, Cicadellidae: Typhlocybinae). Entomologische Abhandlungen. Staatliches Museum für Tierkunde Dresden 55(2): 97-139	Article in Journal	Germany	yes	Entomologische Abhandlungen, Staatliches Museum für Tierkunde Dresden	na	na
[truncated: 17,230 more rows]
